# Supplementary material for: Discovering sparse transcription factor codes for cell states and state transitions during development
Source: eLife. 2017 Mar 15;6:e20488. doi: 10.7554/eLife.20488 (PMC5352226; doi:10.7554/eLife.20488)
Supplement: Figure 1—source data 1. — Sheet 1: The 150 related triplets used for pattern detection are listed, with the root cell type of the triplet in the first column and the two leaves in second and third columns. Cell type names follow (Heng et al., 2008). For each triplet are listed the number of genes with a clear minimum in each cell type and a clear maximum in each cell type (t-test p-value < 0.005). Also listed for each triplet are the length of the triplet, whether the triplet is a lineage progression or a cell fate decision, whether the triplet contains a terminal node, and the entropy in the clear minimum pattern and clear maximum pattern. Sheet 2: The 100 unrelated triplets are listed; cell type names follow (Heng et al., 2008). For each triplet are listed the number of genes with a clear minimum in each cell type and a clear maximum in each cell type (t-test p-value < 0.005) and the entropy in the clear minimum pattern and clear maximum pattern. DOI: http://dx.doi.org/10.7554/eLife.20488.003 [file elife-20488-fig1-data1.xlsx]

## Sheet: related triplets
Root	Leaf 1	Leaf 2	Min in Root	Min in Leaf 1	Min in Leaf 2	Max in Root	Max in Leaf 1	Max in Leaf 2		length of triplet	bifurcation?	terminal nodes?		entropy (min pattern)	entropy (max pattern)
B.FrE.FL	B1a.PC	preB.FrD.FL	0	15	10	9	17	28		2	0	1		0.970951	1.44707
B.FrE.FL	B1a.PC	proB.FrBC.FL	1	19	47	20	19	67		3	0	1		0.96495	1.31682
preB.FrD.FL	B1a.PC	proB.FrBC.FL	2	39	28	22	28	33		3	0	1		1.14133	1.56566
preB.FrD.FL	B.FrE.FL	proB.FrBC.FL	0	10	30	12	24	27		2	0	0		0.811278	1.50997
B.FrE.FL	B1a.PC	proB.FrA.FL	4	24	35	18	17	71		4	0	1		1.25404	1.24511
preB.FrD.FL	B1a.PC	proB.FrA.FL	7	39	18	15	32	40		4	0	1		1.29936	1.4834
preB.FrD.FL	B.FrE.FL	proB.FrA.FL	3	14	21	11	20	37		3	0	0		1.29276	1.42214
proB.FrBC.FL	B1a.PC	proB.FrA.FL	13	85	6	18	66	34		4	0	1		0.850308	1.39991
proB.FrBC.FL	B.FrE.FL	proB.FrA.FL	11	40	8	7	54	29		3	0	0		1.2228	1.25522
proB.FrBC.FL	preB.FrD.FL	proB.FrA.FL	12	14	5	2	45	22		2	0	0		1.47251	1.07605
preB.FrD.BM	B.FrF.BM	preB.FrC.BM	1	11	7	5	22	31		2	0	1		1.21081	1.31837
preB.FrD.BM	B.FrF.BM	proB.FrA.BM	4	6	21	19	18	17		4	0	1		1.22038	1.58348
preB.FrC.BM	B.FrF.BM	proB.FrA.BM	3	13	8	58	42	12		4	0	1		1.38244	1.36754
preB.FrC.BM	preB.FrD.BM	proB.FrA.BM	1	1	17	28	11	15		3	0	0		0.590724	1.47224
preB.FrD.BM	B.FrF.BM	proB.FrBC.BM	0	4	2	2	17	2		3	0	1		0.918296	0.892943
preB.FrC.BM	B.FrF.BM	proB.FrBC.BM	2	7	0	9	27	0		3	0	1		0.764205	0.811278
preB.FrC.BM	preB.FrD.BM	proB.FrBC.BM	2	1	0	3	0	0		2	0	0		0.918296	0
proB.FrBC.BM	B.FrF.BM	proB.FrA.BM	1	9	6	4	29	5		4	0	1		1.24756	1.02448
proB.FrBC.BM	preB.FrD.BM	proB.FrA.BM	0	2	11	1	7	7		3	0	0		0.619382	1.28669
proB.FrBC.BM	preB.FrC.BM	proB.FrA.BM	0	0	14	1	12	8		2	0	0		0	1.20091
B.T3.Sp	B.Fo.Sp	B.FrE.BM	1	8	21	1	3	20		4	0	1		1.03227	0.785235
B.T2.Sp	B.Fo.Sp	B.FrE.BM	0	7	10	0	12	13		4	0	1		0.977418	0.998846
B.T2.Sp	B.FrE.BM	B.T3.Sp	0	10	2	0	12	7		3	0	0		0.650022	0.949452
B.T1.Sp	B.Fo.Sp	B.FrE.BM	0	9	5	0	24	13		4	0	1		0.940286	0.935269
B.T1.Sp	B.FrE.BM	B.T3.Sp	1	2	4	1	10	12		3	0	0		1.37878	1.20883
B.T1.Sp	B.FrE.BM	B.T2.Sp	1	3	2	0	7	3		2	0	0		1.45915	0.881291
B.T2.Sp	B.T1.Sp	B.T3.Sp	0	5	2	0	3	11		2	0	0		0.863121	0.749595
B.T2.Sp	B.Fo.Sp	B.T1.Sp	0	7	3	1	11	6		3	0	1		0.881291	1.19417
B.T3.Sp	B.Fo.Sp	B.T1.Sp	1	6	7	7	2	5		3	0	1		1.29584	1.43156
B.T3.Sp	B.Fo.Sp	B.T2.Sp	0	4	4	4	2	1		2	0	1		1	1.37878
preT.DN2-3.Th	preT.DN2.Th	preT.DN3-4.Th	0	0	2	1	3	0		2	0	0		0	0.811278
preT.DN2-3.Th	preT.DN3-4.Th	preT.ETP.Th	0	4	1	0	0	6		3	0	0		0.721928	0
preT.DN3-4.Th	T.DN4.Th	preT.DN2-3.Th	0	0	0	0	0	4		2	0	0		0	0
preT.DN3-4.Th	T.ISP.Th	preT.DN2-3.Th	0	1	0	0	11	7		3	0	0		0	0.964079
preT.DN3-4.Th	T.DPbl.Th	preT.DN2-3.Th	1	3	0	1	21	7		4	0	0		0.811278	0.9997
preT.DN3-4.Th	T.DP.Th	preT.DN2-3.Th	1	2	0	1	10	4		4	0	0		0.918296	1.15894
preT.DN2.Th	preT.DN3-4.Th	preT.ETP.Th	0	9	0	3	1	9		3	0	0		0	1.14012
preT.DN3-4.Th	T.DN4.Th	preT.DN2.Th	0	0	2	0	1	19		3	0	0		0	0.286397
preT.DN3-4.Th	T.ISP.Th	preT.DN2.Th	1	1	3	2	9	26		4	0	0		1.37095	1.08132
preT.DN3-4.Th	T.DN4.Th	preT.ETP.Th	0	1	0	0	0	19		4	0	0		0	0
T.DN4.Th	T.ISP.Th	preT.DN3-4.Th	0	1	0	1	6	0		2	0	0		0	0.591673
T.DN4.Th	T.DPbl.Th	preT.DN3-4.Th	0	2	0	1	22	2		3	0	0		0	0.639556
T.DN4.Th	T.DPsm.Th	preT.DN3-4.Th	0	3	1	0	17	0		4	0	0		0.811278	0
T.DN4.Th	T.DP.Th	preT.DN3-4.Th	0	5	0	0	8	0		4	0	0		0	0
T.ISP.Th	T.DPbl.Th	preT.DN3-4.Th	0	1	9	1	13	3		3	0	0		0.468996	0.978016
T.ISP.Th	T.DPsm.Th	preT.DN3-4.Th	1	16	2	4	20	3		4	0	0		0.774243	1.08106
T.ISP.Th	T.DP.Th	preT.DN3-4.Th	0	10	1	8	13	2		4	0	0		0.439497	1.30157
T.DPbl.Th	T.DPsm.Th	preT.DN3-4.Th	0	10	10	12	13	6		4	0	0		1	1.51436
T.DP.Th	T.DP69+.Th	preT.DN3-4.Th	3	1	2	4	5	11		5	0	0		1.45915	1.43876
preT.DN2.Th	preT.DN2-3.Th	preT.ETP.Th	1	3	5	1	6	8		2	0	0		1.35164	1.27291
preT.DN2-3.Th	T.DN4.Th	preT.DN2.Th	0	5	0	1	2	3		3	0	0		0	1.45915
preT.DN2-3.Th	T.ISP.Th	preT.DN2.Th	5	13	3	9	51	5		4	0	0		1.32231	0.954173
preT.DN2-3.Th	T.DN4.Th	preT.ETP.Th	1	5	1	1	1	7		4	0	0		1.14883	0.986427
T.DN4.Th	T.ISP.Th	preT.DN2-3.Th	0	1	1	0	14	9		3	0	0		1	0.965636
T.DN4.Th	T.DPbl.Th	preT.DN2-3.Th	0	3	1	0	23	6		4	0	0		0.811278	0.735509
T.DN4.Th	T.DP.Th	preT.DN2-3.Th	0	8	1	0	12	11		5	0	0		0.503258	0.998636
T.ISP.Th	T.DPbl.Th	preT.DN2-3.Th	2	3	40	7	15	25		4	0	0		0.611142	1.41946
T.ISP.Th	T.DP.Th	preT.DN2-3.Th	1	23	8	40	18	17		5	0	0		0.99869	1.46318
preT.DN2.Th	T.DN4.Th	preT.ETP.Th	2	7	2	2	5	9		4	0	0		1.3093	1.36631
T.DN4.Th	T.ISP.Th	preT.DN2.Th	0	3	7	1	17	28		4	0	0		0.881291	1.08676
T.DPsm.Th	T.DN4.Th	T.DP69+.Th	2	1	0	8	13	5		4	0	0		0.918296	1.48062
T.DPbl.Th	T.DN4.Th	T.DP69+.Th	3	0	9	30	5	16		4	0	0		0.811278	1.30348
T.DPbl.Th	T.DN4.Th	T.DPsm.Th	2	3	8	15	5	9		3	0	0		1.33468	1.45307
T.ISP.Th	T.DN4.Th	T.DP69+.Th	2	0	14	16	4	12		4	0	0		0.543564	1.40564
T.ISP.Th	T.DN4.Th	T.DP.Th	0	2	22	11	5	22		3	0	0		0.413817	1.35922
T.ISP.Th	T.DN4.Th	T.DPsm.Th	4	2	15	8	2	16		3	0	0		1.12549	1.2389
T.ISP.Th	T.DN4.Th	T.DPbl.Th	3	13	0	4	5	11		2	0	0		0.696212	1.43876
T.DPsm.Th	T.DP69+.Th	T.ISP.Th	4	5	7	11	7	86		3	0	0		1.54618	0.831555
T.DPbl.Th	T.DP69+.Th	T.ISP.Th	0	85	1	16	30	26		3	0	0		0.0914016	1.53912
T.DPbl.Th	T.DPsm.Th	T.ISP.Th	0	72	12	9	31	31		2	0	0		0.591673	1.42173
T.DPsm.Th	T.DP69+.Th	T.DPbl.Th	5	9	4	6	8	73		2	0	0		1.49554	0.795047
T.4int8+.Th	T.8SP69+.Th	T.DP69+.Th	0	0	6	8	0	3		2	0	0		0	0.845351
T.4int8+.Th	T.8SP24int.Th	T.DP69+.Th	0	0	10	0	1	6		3	0	0		0	0.591673
T.4int8+.Th	T.8SP24-.Th	T.DP69+.Th	0	3	15	10	11	5		4	0	0		0.650022	1.51264
T.DP69+.Th	T.4+8int.Th	T.4int8+.Th	5	1	2	5	2	9		2	1	0		1.29879	1.36631
T.DP69+.Th	T.4SP69+.Th	T.4int8+.Th	3	1	0	1	3	3		3	1	0		0.811278	1.44882
T.DP69+.Th	T.4SP24int.Th	T.4int8+.Th	0	2	0	1	2	12		4	1	0		0	0.905587
T.8SP69+.Th	T.8SP24int.Th	T.DP69+.Th	0	0	9	0	1	2		3	0	0		0	0.918296
T.8SP69+.Th	T.8SP24-.Th	T.DP69+.Th	0	5	19	0	4	7		4	0	0		0.738285	0.94566
T.DP69+.Th	T.4+8int.Th	T.8SP69+.Th	2	1	1	1	2	12		3	1	0		1.5	0.905587
T.DP69+.Th	T.4SP69+.Th	T.8SP69+.Th	7	0	0	0	4	4		4	1	0		0	1
T.8SP24int.Th	T.8SP24-.Th	T.DP69+.Th	1	6	14	4	3	5		4	0	0		1.11552	1.55459
T.DP69+.Th	T.4+8int.Th	T.8SP24-.Th	4	4	7	3	4	33		5	1	0		1.53012	0.841431
T.4+8int.Th	T.4SP69+.Th	T.DP69+.Th	1	0	0	1	10	2		2	0	0		0	0.991264
T.4+8int.Th	T.4SP24int.Th	T.DP69+.Th	4	1	0	3	4	1		3	0	0		0.721928	1.40564
T.4+8int.Th	T.4SP24-.Th	T.DP69+.Th	5	4	0	2	16	4		4	0	0		0.991076	1.0958
T.4SP69+.Th	T.4SP24int.Th	T.DP69+.Th	0	0	5	0	0	1		3	0	0		0	0
T.4SP69+.Th	T.4SP24-.Th	T.DP69+.Th	0	2	9	5	6	2		4	0	0		0.684038	1.46048
T.4SP24int.Th	T.4SP24-.Th	T.DP69+.Th	0	3	2	2	8	5		4	0	0		0.970951	1.39958
T.8SP69+.Th	T.4int8+.Th	T.8SP24int.Th	6	0	0	1	0	0		2	0	0		0	0
T.8SP69+.Th	T.4int8+.Th	T.8SP24-.Th	1	0	1	0	17	4		3	0	0		1	0.702467
T.8SP24int.Th	T.4int8+.Th	T.8SP24-.Th	0	2	13	0	0	5		3	0	0		0.56651	0
T.4SP69+.Th	T.4SP24int.Th	T.4int8+.Th	0	0	4	0	0	10		4	1	0		0	0
T.4SP69+.Th	T.4SP24-.Th	T.4int8+.Th	1	0	3	6	1	5		5	1	0		0.811278	1.32501
T.4SP24int.Th	T.4SP24-.Th	T.4int8+.Th	1	1	4	4	2	7		5	1	0		1.25163	1.41956
T.8SP24int.Th	T.8SP24-.Th	T.8SP69+.Th	0	7	0	11	1	0		2	0	0		0	0.413817
T.8SP69+.Th	T.4+8int.Th	T.8SP24int.Th	1	10	2	0	10	3		4	1	0		0.991264	0.77935
T.8SP69+.Th	T.4+8int.Th	T.8SP24-.Th	0	25	3	0	16	4		5	1	0		0.491237	0.721928
T.4SP69+.Th	T.4+8int.Th	T.4SP24int.Th	0	5	0	0	3	0		2	0	0		0	0
T.4SP69+.Th	T.4+8int.Th	T.4SP24-.Th	0	10	5	6	2	7		3	0	0		0.918296	1.42947
T.4SP24int.Th	T.4+8int.Th	T.4SP24-.Th	0	13	5	1	5	8		3	0	0		0.852405	1.26381
T.4SP24int.Th	T.4SP24-.Th	T.4SP69+.Th	0	8	0	0	6	0		2	0	0		0	0
T.4Nve.Sp	T.4Mem.Sp	T.4SP24-.Th	5	13	3	15	12	11		2	0	1		1.32231	1.57223
T.4Nve.LN	T.4Mem.LN	T.4SP24-.Th	6	3	0	0	2	4		2	0	1		0.918296	0.918296
T.4SP24-.Th	T.4Mem.Sp	T.4SP24int.Th	1	8	5	1	13	6		3	0	1		1.26381	1.14115
T.4Nve.Sp	T.4Mem.Sp	T.4SP24int.Th	8	8	12	19	12	17		3	0	1		1.55666	1.55961
T.4SP24-.Th	T.4Mem.LN	T.4SP24int.Th	1	5	0	2	3	7		3	0	1		0.650022	1.38443
T.4Nve.LN	T.4Mem.LN	T.4SP24int.Th	3	1	2	3	5	8		3	0	1		1.45915	1.47722
T.4SP24-.Th	T.4Nve.Sp	T.4SP24int.Th	0	6	9	1	26	9		2	0	0		0.970951	0.982682
T.4SP24-.Th	T.4Nve.LN	T.4SP24int.Th	0	2	5	0	1	9		2	0	0		0.863121	0.468996
T.4SP24int.Th	T.4Nve.Sp	T.4SP69+.Th	0	15	0	0	33	0		3	0	0		0	0
T.4SP24int.Th	T.4Nve.LN	T.4SP69+.Th	0	10	0	0	5	0		3	0	0		0	0
T.4SP24-.Th	T.4Mem.LN	T.4SP69+.Th	1	6	1	3	1	10		4	0	1		1.06128	1.09491
T.4SP24-.Th	T.4Mem.Sp	T.4SP69+.Th	0	21	3	2	12	13		4	0	1		0.543564	1.3058
T.4SP24-.Th	T.4Nve.Sp	T.4SP69+.Th	0	20	5	3	15	18		3	0	0		0.721928	1.32501
T.4SP24-.Th	T.4Nve.LN	T.4SP69+.Th	0	11	1	0	2	16		3	0	0		0.413817	0.503258
T.4SP24int.Th	T.4+8int.Th	T.4Mem.LN	0	2	2	3	2	6		5	0	0		1	1.43537
T.4SP24int.Th	T.4+8int.Th	T.4Mem.Sp	0	2	4	2	3	20		5	0	1		0.918296	0.916118
T.4SP24int.Th	T.4+8int.Th	T.4Nve.Sp	1	12	10	3	6	50		4	0	1		1.20883	0.756245
T.4SP24int.Th	T.4+8int.Th	T.4Nve.LN	0	8	11	4	5	11		4	0	0		0.981941	1.43876
T.4SP24-.Th	T.4+8int.Th	T.4Nve.Sp	1	32	5	10	19	23		4	0	0		0.731884	1.50867
T.4SP24-.Th	T.4+8int.Th	T.4Nve.LN	0	18	4	4	16	2		4	0	0		0.684038	1.0958
T.8Nve.LN	T.8Mem.LN	T.8SP24-.Th	0	18	0	0	17	10		2	0	1		0	0.950956
T.8Nve.LN	T.8Mem.LN	T.8SP24int.Th	1	14	2	0	10	25		3	0	1		0.834347	0.863121
T.8SP24-.Th	T.8Mem.LN	T.8SP24int.Th	1	32	1	2	42	26		3	0	1		0.38158	1.11944
T.8SP24-.Th	T.8Nve.LN	T.8SP24int.Th	1	2	5	1	1	16		2	0	0		1.29879	0.614369
T.8Nve.Sp	T.8Mem.Sp	T.8SP24-.Th	2	3	0	8	6	14		2	0	1		0.970951	1.49261
T.8Nve.Sp	T.8Mem.Sp	T.8SP24int.Th	4	1	2	3	4	28		3	0	1		1.37878	0.918974
T.8SP24-.Th	T.8Mem.Sp	T.8SP24int.Th	2	23	6	3	8	17		3	0	1		1.03317	1.29872
T.8SP24-.Th	T.8Nve.Sp	T.8SP24int.Th	0	11	0	0	4	18		2	0	0		0	0.684038
T.8SP24-.Th	T.8Nve.LN	T.8SP69+.Th	0	4	2	1	0	9		3	0	0		0.918296	0.468996
T.8SP24int.Th	T.8Nve.LN	T.8SP69+.Th	0	6	1	6	2	0		3	0	0		0.591673	0.811278
T.8SP24-.Th	T.8Nve.Sp	T.8SP69+.Th	0	11	1	2	3	8		3	0	0		0.413817	1.33468
T.8SP24int.Th	T.8Nve.Sp	T.8SP69+.Th	1	16	0	3	1	0		3	0	0		0.322757	0.811278
T.8SP24-.Th	T.8Mem.LN	T.8SP69+.Th	1	32	1	2	24	10		4	0	1		0.38158	1.13497
T.8SP24-.Th	T.8Mem.Sp	T.8SP69+.Th	1	16	3	3	13	8		4	0	1		0.884184	1.38244
T.8SP24int.Th	T.4int8+.Th	T.8Nve.LN	0	2	10	0	1	5		4	0	0		0.650022	0.650022
T.8SP24int.Th	T.4int8+.Th	T.8Nve.Sp	0	2	22	0	0	7		4	0	0		0.413817	0
T.8SP69+.Th	T.4int8+.Th	T.8Nve.LN	0	1	8	0	8	6		4	0	0		0.503258	0.985228
T.8SP69+.Th	T.4int8+.Th	T.8Nve.Sp	0	1	10	0	6	4		4	0	0		0.439497	0.970951
proB.CLP.BM	preT.ETP.Th	proB.FrA.BM	0	1	1	0	21	0		2	1	0		1	0
proB.CLP.BM	preT.ETP.Th	proB.FrBC.BM	0	0	6	3	9	9		3	1	0		0	1.44882
proB.CLP.BM	preT.DN2.Th	proB.FrA.BM	0	5	0	1	68	1		3	1	0		0	0.215748
proB.FrA.BM	proB.CLP.BM	proB.FrBC.BM	0	0	3	0	2	10		2	0	0		0	0.650022
proB.FrBC.BM	preB.FrD.BM	proB.CLP.BM	0	4	6	1	7	19		4	0	0		0.970951	1.03777
preT.DN2.Th	preT.DN2-3.Th	proB.CLP.BM	1	4	27	2	11	18		3	0	0		0.738064	1.24089
preT.ETP.Th	preT.DN2-3.Th	proB.CLP.BM	0	2	3	3	14	7		3	0	0		0.970951	1.34707
preT.ETP.Th	preT.DN2.Th	proB.CLP.BM	0	4	17	5	18	8		2	0	0		0.702467	1.38425
proB.FrA.FL	proB.CLP.FL	proB.FrBC.FL	0	9	18	2	1	20		2	0	0		0.918296	0.678407
proB.FrBC.FL	preB.FrD.FL	proB.CLP.FL	5	9	8	3	47	15		3	0	0		1.54402	1.03123

## Sheet: unrelated triplets
Cell type 1	Cell type 2	Cell type 3	Min in Type 1	Min in Type 2	Min in Type 3	Max in Type 1	Max in Type 2	Max in Type 3		entropy (min pattern)	entropy (max pattern)
B1a.PC	proB.CLP.BM	T.8Mem.Sp	15	31	12	32	38	26		1.45793	1.56796
B.FrE.FL	proB.CLP.BM	T.8Mem.Sp	7	21	14	32	25	28		1.45915	1.5776
B.FrF.BM	proB.CLP.BM	T.8Mem.Sp	9	28	8	25	32	17		1.33329	1.53941
B.T3.Sp	proB.CLP.BM	T.8Mem.Sp	11	44	22	89	32	24		1.37878	1.34281
B.T2.Sp	proB.CLP.BM	T.8Mem.Sp	12	38	20	70	33	20		1.43101	1.39818
B1a.PC	proB.FrA.FL	T.8Mem.Sp	24	34	15	32	115	31		1.51015	1.2914
B.FrE.FL	proB.FrA.FL	T.8Mem.Sp	10	30	31	30	66	35		1.44544	1.49402
B.FrF.BM	proB.FrA.FL	T.8Mem.Sp	16	31	10	29	100	21		1.4329	1.24545
B.T3.Sp	proB.FrA.FL	T.8Mem.Sp	14	47	48	75	94	34		1.42464	1.47683
B.T2.Sp	proB.FrA.FL	T.8Mem.Sp	20	43	41	63	100	29		1.51364	1.42957
B1a.PC	proB.CLP.FL	T.8Mem.Sp	11	35	12	32	79	25		1.36491	1.39559
B.FrE.FL	proB.CLP.FL	T.8Mem.Sp	4	27	26	30	46	31		1.29616	1.55576
B.FrF.BM	proB.CLP.FL	T.8Mem.Sp	13	32	9	31	75	14		1.37276	1.28985
B.T3.Sp	proB.CLP.FL	T.8Mem.Sp	7	47	34	79	63	20		1.30385	1.40771
B.T2.Sp	proB.CLP.FL	T.8Mem.Sp	13	46	25	59	67	16		1.41272	1.39268
B1a.PC	preT.ETP.Th	T.8Mem.Sp	18	23	10	28	54	22		1.50929	1.4747
B.FrE.FL	preT.ETP.Th	T.8Mem.Sp	9	22	9	26	33	28		1.44277	1.57763
B.FrF.BM	preT.ETP.Th	T.8Mem.Sp	12	17	5	25	57	15		1.43699	1.37131
B.T3.Sp	preT.ETP.Th	T.8Mem.Sp	12	32	18	75	54	20		1.46906	1.41807
B.T2.Sp	preT.ETP.Th	T.8Mem.Sp	15	25	15	64	53	17		1.53948	1.41634
B1a.PC	preT.DN2.Th	T.8Mem.Sp	26	22	12	35	89	19		1.51792	1.30969
B.FrE.FL	preT.DN2.Th	T.8Mem.Sp	9	25	21	39	68	26		1.47473	1.47416
B.FrF.BM	preT.DN2.Th	T.8Mem.Sp	16	26	12	29	98	14		1.50987	1.1649
B.T3.Sp	preT.DN2.Th	T.8Mem.Sp	14	37	35	94	89	17		1.47769	1.33406
B.T2.Sp	preT.DN2.Th	T.8Mem.Sp	23	30	22	75	87	13		1.57074	1.30376
B1a.PC	proB.CLP.BM	T.8Nve.LN	11	30	11	27	37	42		1.40594	1.5618
B.FrE.FL	proB.CLP.BM	T.8Nve.LN	8	22	16	22	25	29		1.47775	1.57575
B.FrF.BM	proB.CLP.BM	T.8Nve.LN	8	26	5	16	32	33		1.23871	1.51929
B.T3.Sp	proB.CLP.BM	T.8Nve.LN	9	53	23	65	36	29		1.2782	1.49581
B.T2.Sp	proB.CLP.BM	T.8Nve.LN	9	41	15	51	36	30		1.30249	1.54885
B1a.PC	proB.FrA.FL	T.8Nve.LN	25	28	13	26	103	35		1.517	1.31825
B.FrE.FL	proB.FrA.FL	T.8Nve.LN	11	24	26	21	63	35		1.49952	1.44665
B.FrF.BM	proB.FrA.FL	T.8Nve.LN	20	24	5	20	97	31		1.36803	1.26209
B.T3.Sp	proB.FrA.FL	T.8Nve.LN	16	47	42	57	93	33		1.46145	1.46607
B.T2.Sp	proB.FrA.FL	T.8Nve.LN	15	45	33	45	100	32		1.46172	1.41383
B1a.PC	proB.CLP.FL	T.8Nve.LN	14	40	7	26	68	31		1.24497	1.44787
B.FrE.FL	proB.CLP.FL	T.8Nve.LN	5	30	14	24	40	37		1.28574	1.55261
B.FrF.BM	proB.CLP.FL	T.8Nve.LN	13	29	3	18	73	27		1.18647	1.32927
B.T3.Sp	proB.CLP.FL	T.8Nve.LN	9	50	23	61	58	25		1.29945	1.49191
B.T2.Sp	proB.CLP.FL	T.8Nve.LN	9	48	13	45	64	29		1.20481	1.51421
B1a.PC	preT.ETP.Th	T.8Nve.LN	13	19	11	24	41	24		1.54557	1.53486
B.FrE.FL	preT.ETP.Th	T.8Nve.LN	7	15	9	23	21	19		1.50955	1.58059
B.FrF.BM	preT.ETP.Th	T.8Nve.LN	13	14	6	17	41	19		1.50141	1.46345
B.T3.Sp	preT.ETP.Th	T.8Nve.LN	13	26	23	58	38	18		1.52905	1.4448
B.T2.Sp	preT.ETP.Th	T.8Nve.LN	15	23	14	53	40	17		1.54759	1.4546
B1a.PC	preT.DN2.Th	T.8Nve.LN	26	32	14	27	81	26		1.51	1.36369
B.FrE.FL	preT.DN2.Th	T.8Nve.LN	16	22	18	28	64	25		1.57225	1.44556
B.FrF.BM	preT.DN2.Th	T.8Nve.LN	24	24	7	20	87	23		1.42264	1.24532
B.T3.Sp	preT.DN2.Th	T.8Nve.LN	19	46	33	72	86	19		1.49982	1.37945
B.T2.Sp	preT.DN2.Th	T.8Nve.LN	25	41	16	56	85	17		1.48248	1.3576
B1a.PC	proB.CLP.BM	T.4Nve.Sp	25	41	12	33	36	63		1.4293	1.52052
B.FrE.FL	proB.CLP.BM	T.4Nve.Sp	14	29	14	26	26	73		1.49101	1.39554
B.FrF.BM	proB.CLP.BM	T.4Nve.Sp	16	36	6	16	32	59		1.2782	1.40431
B.T3.Sp	proB.CLP.BM	T.4Nve.Sp	15	78	19	67	35	48		1.18615	1.53528
B.T2.Sp	proB.CLP.BM	T.4Nve.Sp	19	60	16	57	35	66		1.31592	1.5384
B1a.PC	proB.FrA.FL	T.4Nve.Sp	46	49	18	31	110	63		1.47272	1.41704
B.FrE.FL	proB.FrA.FL	T.4Nve.Sp	22	36	28	26	63	86		1.55614	1.44299
B.FrF.BM	proB.FrA.FL	T.4Nve.Sp	37	46	5	20	98	60		1.24985	1.35723
B.T3.Sp	proB.FrA.FL	T.4Nve.Sp	23	77	44	58	96	50		1.42826	1.52482
B.T2.Sp	proB.FrA.FL	T.4Nve.Sp	32	82	38	56	108	70		1.45358	1.52938
B1a.PC	proB.CLP.FL	T.4Nve.Sp	27	57	9	30	69	58		1.27694	1.50827
B.FrE.FL	proB.CLP.FL	T.4Nve.Sp	13	42	17	26	46	81		1.39118	1.44155
B.FrF.BM	proB.CLP.FL	T.4Nve.Sp	26	42	4	19	72	55		1.21591	1.4164
B.T3.Sp	proB.CLP.FL	T.4Nve.Sp	15	74	27	60	63	47		1.28484	1.57382
B.T2.Sp	proB.CLP.FL	T.4Nve.Sp	26	80	23	51	67	64		1.33675	1.57526
B1a.PC	preT.ETP.Th	T.4Nve.Sp	33	34	9	31	54	36		1.40624	1.54315
B.FrE.FL	preT.ETP.Th	T.4Nve.Sp	13	23	8	30	30	48		1.45608	1.54663
B.FrF.BM	preT.ETP.Th	T.4Nve.Sp	26	22	3	18	49	33		1.25921	1.47741
B.T3.Sp	preT.ETP.Th	T.4Nve.Sp	26	53	16	63	52	29		1.41416	1.51803
B.T2.Sp	preT.ETP.Th	T.4Nve.Sp	26	47	15	59	53	36		1.43806	1.55558
B1a.PC	preT.DN2.Th	T.4Nve.Sp	53	49	13	32	86	38		1.395	1.43874
B.FrE.FL	preT.DN2.Th	T.4Nve.Sp	29	37	18	37	60	54		1.52696	1.55677
B.FrF.BM	preT.DN2.Th	T.4Nve.Sp	42	37	6	21	92	33		1.29484	1.30714
B.T3.Sp	preT.DN2.Th	T.4Nve.Sp	33	76	28	79	89	31		1.43443	1.46618
B.T2.Sp	preT.DN2.Th	T.4Nve.Sp	48	70	13	68	85	36		1.34462	1.50477
B1a.PC	proB.CLP.BM	T.4Mem.Sp	16	38	9	25	34	21		1.34314	1.55557
B.FrE.FL	proB.CLP.BM	T.4Mem.Sp	7	26	14	22	23	23		1.40212	1.58465
B.FrF.BM	proB.CLP.BM	T.4Mem.Sp	11	31	6	16	29	18		1.26947	1.53379
B.T3.Sp	proB.CLP.BM	T.4Mem.Sp	12	55	18	71	31	18		1.27936	1.36297
B.T2.Sp	proB.CLP.BM	T.4Mem.Sp	12	48	11	48	32	19		1.23212	1.49008
B1a.PC	proB.FrA.FL	T.4Mem.Sp	27	35	14	26	107	29		1.49517	1.26312
B.FrE.FL	proB.FrA.FL	T.4Mem.Sp	10	29	31	17	65	40		1.44813	1.40764
B.FrF.BM	proB.FrA.FL	T.4Mem.Sp	22	32	6	20	98	22		1.3466	1.1808
B.T3.Sp	proB.FrA.FL	T.4Mem.Sp	17	49	44	56	94	26		1.46479	1.41651
B.T2.Sp	proB.FrA.FL	T.4Mem.Sp	18	50	31	43	99	25		1.46944	1.36136
B1a.PC	proB.CLP.FL	T.4Mem.Sp	18	42	5	28	66	29		1.20474	1.45945
B.FrE.FL	proB.CLP.FL	T.4Mem.Sp	7	31	12	20	44	38		1.31883	1.51483
B.FrF.BM	proB.CLP.FL	T.4Mem.Sp	18	31	4	20	65	22		1.26304	1.35829
B.T3.Sp	proB.CLP.FL	T.4Mem.Sp	12	54	18	60	60	26		1.28705	1.49778
B.T2.Sp	proB.CLP.FL	T.4Mem.Sp	15	50	16	44	64	23		1.34237	1.47421
B1a.PC	preT.ETP.Th	T.4Mem.Sp	20	24	7	25	42	16		1.4346	1.47656
B.FrE.FL	preT.ETP.Th	T.4Mem.Sp	10	20	9	20	25	20		1.48573	1.57662
B.FrF.BM	preT.ETP.Th	T.4Mem.Sp	14	21	2	15	45	11		1.22184	1.30763
B.T3.Sp	preT.ETP.Th	T.4Mem.Sp	14	34	14	58	37	15		1.44485	1.40758
B.T2.Sp	preT.ETP.Th	T.4Mem.Sp	14	30	12	44	41	16		1.45862	1.47133
B1a.PC	preT.DN2.Th	T.4Mem.Sp	31	28	10	25	80	17		1.45048	1.26404
B.FrE.FL	preT.DN2.Th	T.4Mem.Sp	16	19	16	26	62	21		1.58006	1.41396
B.FrF.BM	preT.DN2.Th	T.4Mem.Sp	26	27	4	19	85	13		1.29616	1.11298
B.T3.Sp	preT.DN2.Th	T.4Mem.Sp	24	38	25	69	81	16		1.55149	1.35687
B.T2.Sp	preT.DN2.Th	T.4Mem.Sp	22	33	16	49	78	17		1.52197	1.37222
