# Supplementary material for: Discovering sparse transcription factor codes for cell states and state transitions during development
Source: eLife. 2017 Mar 15;6:e20488. doi: 10.7554/eLife.20488 (PMC5352226; doi:10.7554/eLife.20488)
Supplement: Figure 1—source data 2. — The list of human transcription factors used to cluster and infer lineages for the hematopoietic and intestinal development trees. The list was adapted from (Thomson et al., 2011). DOI: http://dx.doi.org/10.7554/eLife.20488.004 [file elife-20488-fig1-data2.xls]

## Sheet: mtf
1300003B13Rik
1300018I17Rik
1700003F12Rik
1700014N06Rik
1700086D15Rik
1700090G07Rik
1810007M14Rik
2810021G02Rik
2810021J22Rik
3632451O06Rik
4921520G13Rik
4930430A15Rik
4931423N10Rik
4933426I21Rik
5730403M16Rik
5830417I10Rik
6330416L07Rik
6720456H20Rik
6720489N17Rik
9130019O22Rik
9230110K08Rik
AW146020
Aatf
Abt1
Abtb1
Acyp2
Adnp
Aebp1
Aebp2
Aes
Aff1
Aff3
Ahctf1
Ahr
Ahrr
Aip
Aire
Alx3
Alx4
Ank1
Ank2
Ankfy1
Ankhd1
Ankib1
Ankra2
Ankrd1
Ankrd10
Ankrd2
Ankrd22
Ankrd32
Ankrd33
Ankrd36
Ankrd42
Ankrd45
Ankrd46
Ankrd49
Ankrd5
Ankrd52
Ankrd54
Ankrd55
Ankrd56
Ankrd57
Ankrd6
Ankrd7
Anks3
Anks4b
Ar
Arhgap17
Arid1a
Arid3a
Arid3b
Arid4a
Arid5b
Arnt
Arnt2
Arntl
Arx
Asb1
Asb10
Asb11
Asb12
Asb15
Asb2
Asb3
Asb4
Asb5
Asb6
Asb8
Asb9
Ascl1
Ascl2
Ascl3
Ash1l
Ash2l
Asxl1
Asz1
Atf1
Atf2
Atf3
Atf4
Atf5
Atf6
Atf7
Atf7ip
Atm
Atoh1
Atxn3
B3gat3
B930041F14Rik
BC003267
BC024139
BC031441
Bach1
Bach2
Bard1
Barhl1
Barx1
Barx2
Basp1
Bat4
Batf
Batf2
Baz1b
Baz2a
Bbx
Bcl11a
Bcl3
Bcl6
Bcl6b
Bclaf1
Bcor
Bcorl1
Blzf1
Bmi1
Bmyc
Bnc1
Bola1
Bpnt1
Brca1
Brd8
Brdt
Brpf1
Brwd1
Btbd11
Btf3
C1d
C330022B21Rik
Camk4
Carf
Carhsp1
Carm1
Caskin1
Cbfb
Cbx2
Cbx3
Cbx4
Cbx7
Cbx8
Ccnc
Ccnh
Ccnk
Ccnt1
Ccnt2
Cdc5l
Cdk2
Cdk4
Cdk7
Cdk9
Cdkn2a
Cdkn2b
Cdkn2c
Cdkn2d
Cdx1
Cdx2
Cdx4
Cebpa
Cebpb
Cebpd
Cebpg
Cebpz
Cecr6
Chd4
Chd7
Chgb
Ciao1
Cic
Ciita
Cited1
Cited2
Cited4
Clip2
Clock
Clpb
Cml3
Cnbp
Cnot7
Cnot8
Cops2
Cops5
Cphx
Creb1
Creb3
Creb3l1
Creb3l3
Creb3l4
Creb5
Crebbp
Crebzf
Crem
Crx
Csda
Csdc2
Csde1
Ctbp2
Ctcf
Ctnnb1
Ctnnbl1
Cxxc1
D11Bwg0517e
Dach1
Dach2
Daxx
Dazap2
Dbp
Dbx1
Dcp1a
Ddit3
Ddx20
Ddx54
Ddx58
Deaf1
Dedd
Dedd2
Dek
Dido1
Dlx1
Dlx2
Dlx3
Dlx4
Dlx5
Dlx6
Dmap1
Dmbx1
Dmrt1
Dmrt2
Dmrt3
Dmrta1
Dmrta2
Dmrtc2
Dmtf1
Dnmt1
Dnmt3a
Dot1l
Dpf2
Dpf3
Dr1
Drap1
Drg1
Dusp26
Dysfip1
E2f1
E2f2
E2f3
E2f4
E2f5
E2f6
E4f1
Ebf1
Ebf2
Ebf3
Ebf4
Ecd
Eed
Egr1
Egr2
Egr3
Egr4
Ehf
Ehmt1
Ehmt2
Eid2
Elavl2
Elf1
Elf2
Elf3
Elf5
Elk1
Elk3
Elk4
Ell
Ell2
Emx1
Emx2
En1
En2
Enpp2
Eomes
Ep300
Epas1
Ercc2
Ercc3
Ercc8
Erf
Erg
Esr1
Esr2
Esrra
Esrrb
Esrrg
Esx1
Ets1
Ets2
Etv1
Etv2
Etv3
Etv4
Etv6
Evx1
Evx2
Ewsr1
Ezh1
Ezh2
Fah
Fank1
Fbxo24
Fbxw7
Fem1a
Fem1b
Fem1c
Fev
Fhl2
Fhl5
Fli1
Fmnl2
Fos
Fosb
Fosl1
Fosl2
Foxa1
Foxa2
Foxa3
Foxb1
Foxb2
Foxc1
Foxc2
Foxd1
Foxd2
Foxd3
Foxd4
Foxe3
Foxf1a
Foxf2
Foxg1
Foxh1
Foxi1
Foxj1
Foxj2
Foxj3
Foxk1
Foxl1
Foxl2
Foxm1
Foxn1
Foxn2
Foxn4
Foxo1
Foxp1
Foxp2
Foxp3
Foxp4
Foxq1
Fus
Fusip1
Gabpa
Gabpb1
Garnl1
Gas7
Gata1
Gata2
Gata3
Gata4
Gata5
Gata6
Gbx2
Gcdh
Gcm1
Gcm2
Gfi1
Gfi1b
Gli1
Gli2
Gli3
Glis1
Glis2
Glrp1
Gls2
Gmcl1
Gmeb1
Gmeb2
Gpkow
Grlf1
Gsc
Gtf2a1
Gtf2b
Gtf2e1
Gtf2e2
Gtf2f1
Gtf2f2
Gtf2h1
Gtf2h2
Gtf2h3
Gtf2h4
Gtf2i
Gtf2ird1
Gtf3c1
Gtf3c2
Gtf3c4
Gzf1
Hand1
Hand2
Hbp1
Hcfc1
Hcls1
Hdac10
Hdac11
Hdac2
Hdac3
Hdac5
Hdac8
Hdac9
Hdgfrp2
Helz
Hes1
Hes2
Hes3
Hes5
Hes6
Hes7
Hesx1
Hexim1
Hey1
Hey2
Heyl
Hhex
Hic1
Hic2
Hif1a
Hif1an
Hif3a
Hils1
Hipk2
Hira
Hivep1
Hivep2
Hivep3
Hlf
Hltf
Hmbox1
Hmg20a
Hmg20b
Hmga1
Hmga2
Hmgb2
Hmgb3
Hmgb4
Hmgcs1
Hmgn2
Hmx1
Hmx2
Hmx3
Hnf4a
Hnf4g
Homez
Hoxa1
Hoxa10
Hoxa11
Hoxa13
Hoxa2
Hoxa3
Hoxa4
Hoxa5
Hoxa7
Hoxa9
Hoxb1
Hoxb13
Hoxb2
Hoxb3
Hoxb4
Hoxb5
Hoxb6
Hoxb8
Hoxb9
Hoxc10
Hoxc13
Hoxc4
Hoxc5
Hoxc6
Hoxc8
Hoxc9
Hoxd1
Hoxd10
Hoxd11
Hoxd12
Hoxd13
Hoxd3
Hoxd4
Hoxd8
Hoxd9
Hr
Hsbp1
Hsf1
Hsf2
Hsf2bp
Hsf4
Hspb9
Htatip2
Htatsf1
Htr5a
Huwe1
Id1
Id2
Id3
Id4
Ifnar2
Ighmbp2
Ikbkb
Ikbkg
Ikzf1
Ikzf2
Ikzf3
Il31ra
Ilf3
Ing1
Ing2
Ing3
Ing4
Insm1
Insm2
Ints12
Invs
Irf1
Irf2
Irf2bp1
Irf3
Irf4
Irf5
Irf6
Irf7
Irf8
Irx1
Irx2
Irx3
Irx4
Irx5
Irx6
Isl1
Isl2
Isx
Ivns1abp
Jazf1
Jmy
Jun
Junb
Keap1
Khdrbs1
Klf1
Klf10
Klf12
Klf13
Klf15
Klf16
Klf2
Klf3
Klf4
Klf5
Klf6
Klf7
Klf9
Klhl29
Krr1
L3mbtl2
Lass2
Lass4
Lass5
Lass6
Lba1
Lbh
Lbx1
Lbx2
Lcor
Lcorl
Ldb1
Ldb2
Lef1
Lhx1
Lhx2
Lhx3
Lhx4
Lhx5
Lhx6
Lhx8
Lhx9
Limd1
Lin28
Lmo1
Lmo2
Lmo4
Lmx1a
Lmx1b
Lrrc6
Lsm11
Lsm4
Lyl1
Maf
Mafb
Maff
Mafg
Mafk
Maged1
Maml1
Map3k12
Mapk1
Mapk3
Mapk8
Mapk8ip1
Max
Maz
Mbd2
Mbd3
Mbd3l1
Mcm2
Mcm3
Mcm4
Mcm5
Mcm6
Mcm7
Mcm8
Mecp2
Med12
Med31
Med4
Med8
Mef2a
Mef2b
Mef2c
Mef2d
Meis1
Men1
Meox1
Meox2
Mga
Mib2
Mid1
Mitf
Mixl1
Mki67ip
Mkl1
Mll1
Mll3
Mll5
Mllt1
Mllt10
Mllt3
Mlx
Mlxipl
Mnat1
Mnt
Mpl
Msc
Msrb2
Msx1
Msx2
Msx3
Mta1
Mta2
Mta3
Mtf1
Mtf2
Mtfmt
Mtpn
Musk
Mxd1
Mxd3
Mxd4
Mxi1
Myb
Mybbp1a
Mybl1
Mybl2
Myc
Mycbp
Mycl1
Mycn
Mycs
Myef2
Myf5
Myf6
Mynn
Myocd
Myod1
Myog
Myst2
Myst3
Myst4
Myt1
Myt1l
Mzf1
Nab1
Nab2
Naca
Narg1
Ncoa1
Ncoa2
Ncoa3
Ncoa5
Ncoa6
Ncor1
Ncor2
Ndn
Nedd8
Neurod1
Neurod2
Neurod4
Neurod6
Neurog1
Neurog2
Neurog3
Nfat5
Nfatc1
Nfatc2
Nfatc2ip
Nfatc3
Nfatc4
Nfe2
Nfe2l1
Nfe2l2
Nfe2l3
Nfia
Nfib
Nfic
Nfil3
Nfix
Nfkb1
Nfkb2
Nfkbib
Nfkbie
Nfkbil1
Nfkbiz
Nfx1
Nfxl1
Nfya
Nfyb
Nfyc
Nhlh1
Nhlh2
Nkd2
Nkrf
Nkx1-2
Nkx2-2
Nkx2-3
Nkx2-4
Nkx2-5
Nkx2-6
Nkx2-9
Nkx3-1
Nkx6-1
Nkx6-2
Nkx6-3
Nmi
Nobox
Notch1
Notch2
Notch3
Notch4
Npas1
Npas2
Npas3
Nr0b1
Nr0b2
Nr1d1
Nr1d2
Nr1h2
Nr1h3
Nr1h4
Nr1i2
Nr1i3
Nr2c1
Nr2c2
Nr2e1
Nr2e3
Nr2f1
Nr2f2
Nr2f6
Nr3c1
Nr3c2
Nr4a1
Nr4a2
Nr4a3
Nr5a1
Nr5a2
Nr6a1
Nrarp
Nrf1
Nrip1
Nrip2
Nrl
Nsbp1
Nsd1
Nudt12
Nupr1
ORF63
Obox3
Obox5
Olig1
Olig2
Onecut1
Onecut3
Orc2l
Osgin1
Ostf1
Otp
Otud4
Otx1
Otx2
Ovol1
Ovol2
Papola
Papolb
Papolg
Pappa2
Pard3b
Patz1
Pawr
Pax1
Pax3
Pax4
Pax5
Pax6
Pax7
Pax8
Pax9
Pbrm1
Pbx1
Pbx2
Pbx3
Pbx4
Pbxip1
Pcbd1
Pcdh1
Pcgf2
Pcgf6
Pdcd11
Pdcd7
Pdlim1
Pdlim4
Pdx1
Peg3
Per1
Per2
Per3
Pfdn1
Pgbd1
Pgr
Phf1
Phf10
Phf12
Phf13
Phf14
Phf2
Phf20
Phf21a
Phf21b
Phf23
Phf5a
Phf7
Phf8
Phox2a
Phox2b
Phtf1
Pias1
Pias2
Pias4
Pir
Pitx1
Pitx2
Pitx3
Pknox1
Pknox2
Pla2g6
Plagl1
Plagl2
Plrg1
Pmfbp1
Pml
Pms1
Pogk
Polr2a
Polr2b
Polr2c
Polr2d
Polr2e
Polr2f
Polr2g
Polr2h
Polr2i
Polr2j
Polr2k
Polr2l
Polr3b
Polr3d
Polr3e
Polr3f
Polr3h
Polrmt
Pou1f1
Pou2af1
Pou2f1
Pou2f2
Pou2f3
Pou3f1
Pou3f2
Pou3f3
Pou3f4
Pou4f1
Pou4f2
Pou4f3
Pou5f1
Pou6f1
Pou6f2
Ppara
Ppard
Pparg
Ppargc1a
Ppargc1b
Ppp1r10
Ppp1r12c
Ppp1r13b
Ppp1r16b
Ppp1r1b
Ppp2r1a
Ppp3cb
Ppp5c
Pqbp1
Prdm1
Prdm16
Prdm5
Preb
Prkar1a
Prop1
Prox1
Prr3
Prrx1
Prrx2
Prrxl1
Prss35
Psmc3
Psmc5
Psmd10
Psmd9
Ptf1a
Ptges2
Ptma
Pura
Purb
Pwp1
Pygo1
Pygo2
Rab11a
Rab11b
Rab15
Rab18
Rab1b
Rab25
Rab8a
Rab8b
Rabl3
Rai1
Rai14
Rara
Rarb
Rarg
Rassf7
Rax
Rb1
Rbak
Rbbp7
Rbl1
Rbm14
Rbm39
Rbm9
Rbpj
Rbpjl
Rcor2
Rel
Rela
Relb
Rem2
Rest
Rexo4
Rfc1
Rfx1
Rfx2
Rfx3
Rfx4
Rfx5
Rfxank
Rfxap
Rhox6
Rhox9
Ring1
Ripk4
Rnf14
Rnf141
Rnf38
Rnf4
Rnps1
Rora
Rorb
Rorc
Rps6ka4
Rsrc1
Runx1
Runx1t1
Runx2
Runx3
Ruvbl1
Ruvbl2
Rxra
Rxrb
Rxrg
Rybp
Safb
Safb2
Sall1
Sall2
Sall3
Sall4
Sap18
Sap30
Sap30bp
Satb1
Satb2
Scand1
Scap
Scmh1
Scrt1
Scx
Sec14l2
Sertad1
Sertad2
Setbp1
Sf1
Sfpi1
Sfrs5
Sh3d19
Sh3pxd2b
Shank3
Shox2
Shprh
Siah2
Sim1
Sim2
Sin3a
Sin3b
Sirt1
Sirt2
Sirt3
Sirt4
Sirt5
Sirt6
Sirt7
Six1
Six2
Six3
Six4
Six5
Six6
Ski
Smad1
Smad2
Smad3
Smad4
Smad5
Smad7
Smad9
Smarca1
Smarca2
Smarca4
Smarca5
Smarcb1
Smarce1
Smyd1
Snai1
Snai2
Snai3
Snapc2
Snapc4
Sncaip
Snip1
Snrpb
Solh
Sox1
Sox10
Sox11
Sox12
Sox13
Sox14
Sox15
Sox17
Sox18
Sox2
Sox21
Sox3
Sox30
Sox4
Sox5
Sox6
Sox7
Sox8
Sox9
Sp1
Sp2
Sp3
Sp4
Sp5
Sp6
Sp7
Spdef
Spen
Spib
Spic
Spz1
Sqstm1
Sra1
Srebf1
Srebf2
Srf
Sry
Ssbp2
Ssbp3
Ssbp4
Ssrp1
Ssxb1
St18
Stag1
Stat1
Stat2
Stat3
Stat4
Stat5a
Stat5b
Stat6
Strap
Strm
Sub1
Supt3h
Supt4h1
Supt5h
Supt7l
Suz12
T
Tada2l
Tada3l
Taf1
Taf10
Taf11
Taf12
Taf13
Taf1a
Taf1b
Taf1c
Taf3
Taf4a
Taf5
Taf5l
Taf6
Taf6l
Taf7
Taf9
Tal1
Tal2
Tardbp
Tbp
Tbpl1
Tbr1
Tbx1
Tbx15
Tbx18
Tbx19
Tbx2
Tbx20
Tbx21
Tbx22
Tbx3
Tbx4
Tbx5
Tbx6
Tcea1
Tcea2
Tcea3
Tceal1
Tceb2
Tceb3
Tcerg1
Tcf12
Tcf15
Tcf19
Tcf20
Tcf21
Tcf3
Tcf4
Tcf7
Tcf7l2
Tcfap2a
Tcfap2b
Tcfap2c
Tcfap2d
Tcfap2e
Tcfap4
Tcfcp2
Tcfcp2l1
Tcfe2a
Tcfe3
Tcfeb
Tcfec
Tcfl5
Tead1
Tead2
Tead3
Tead4
Tef
Tfam
Tgfb1i1
Tgif1
Tgif2
Th1l
Thra
Thrap3
Thrb
Thrsp
Tial1
Tle1
Tle2
Tle3
Tle4
Tle6
Tlx1
Tlx2
Tlx3
Tmem131
Tmpo
Tnfaip3
Tob1
Tox4
Trerf1
Trib3
Trim24
Trim28
Trim30
Trip13
Trip4
Trip6
Trp53
Trp53bp1
Trp63
Trp73
Trps1
Tsc22d1
Tsc22d3
Tsc22d4
Tsg101
Tshz1
Tshz3
Ttrap
Tulp4
Twist1
Twist2
Tysnd1
Ube2w
Ubn1
Ubp1
Ubtf
Ugp2
Uhrf1
Uhrf2
Usf1
Usf2
Utf1
Vax1
Vax2
Vdr
Vgll2
Vps72
Vsx1
Wasl
Whsc2
Wt1
Wwp1
Wwtr1
Xab2
Xbp1
Xrcc3
Yaf2
Ybx1
Yeats4
Yy1
Zbtb1
Zbtb16
Zbtb17
Zbtb20
Zbtb22
Zbtb3
Zbtb32
Zbtb33
Zbtb43
Zbtb48
Zbtb7a
Zcchc8
Zdhhc1
Zdhhc13
Zdhhc15
Zdhhc16
Zdhhc21
Zdhhc25
Zdhhc5
Zdhhc6
Zeb1
Zeb2
Zfp1
Zfp105
Zfp108
Zfp109
Zfp110
Zfp111
Zfp112
Zfp113
Zfp119
Zfp128
Zfp13
Zfp131
Zfp14
Zfp142
Zfp143
Zfp148
Zfp160
Zfp161
Zfp182
Zfp189
Zfp191
Zfp192
Zfp2
Zfp202
Zfp207
Zfp219
Zfp235
Zfp238
Zfp239
Zfp248
Zfp263
Zfp27
Zfp275
Zfp277
Zfp281
Zfp282
Zfp286
Zfp287
Zfp292
Zfp295
Zfp319
Zfp334
Zfp35
Zfp354a
Zfp354b
Zfp354c
Zfp36
Zfp36l1
Zfp37
Zfp386
Zfp39
Zfp398
Zfp40
Zfp407
Zfp41
Zfp410
Zfp418
Zfp42
Zfp423
Zfp426
Zfp445
Zfp446
Zfp449
Zfp451
Zfp454
Zfp46
Zfp467
Zfp473
Zfp51
Zfp52
Zfp523
Zfp524
Zfp54
Zfp553
Zfp566
Zfp57
Zfp580
Zfp59
Zfp592
Zfp593
Zfp597
Zfp60
Zfp606
Zfp61
Zfp612
Zfp617
Zfp637
Zfp64
Zfp647
Zfp653
Zfp661
Zfp68
Zfp688
Zfp689
Zfp707
Zfp709
Zfp748
Zfp768
Zfp786
Zfp81
Zfp810
Zfp82
Zfp84
Zfp9
Zfp90
Zfp92
Zfp93
Zfp94
Zfpm1
Zfpm2
Zfx
Zfy2
Zhx1
Zhx3
Zic1
Zic2
Zic3
Zik1
Zim1
Zkscan1
Zkscan14
Zkscan3
Zkscan5
Zkscan6
Zmym2
Zmynd11
Znrd1
Zscan2
Zscan21
Zscan22
Zswim4
