# Supplementary material for: Discovering sparse transcription factor codes for cell states and state transitions during development
Source: eLife. 2017 Mar 15;6:e20488. doi: 10.7554/eLife.20488 (PMC5352226; doi:10.7554/eLife.20488)
Supplement: Figure 2—source data 2. — Listed are, for each triplet of cell types, the probabilities of the four topologies for prior odds p(βi=1)p(βi=0)=0.05; the number of topologies that reach probability p(T | {giA,B,C})>0.6 for some value of p(βi=1)p(βi=0) between 10−6 and 102; the non-null topology that has the highest probability p(T | {giA,B,C}) over the range of prior odds (if the null topology is the most likely topology for the entire range of prior odds, the topology is marked ‘null’); and the value of highest probability p(T | {giA,B,C}) over the range of prior odds; the correct topology and triplet length in the traditional model; and the correct topology and triplet length in the Adolfsson model. DOI: http://dx.doi.org/10.7554/eLife.20488.010 [file elife-20488-fig2-data2.xlsx]

## Sheet: undirected
Hematopoietic data: Table of triplet probabilities
triplet			correct topology (trad.)	correct topology (adolfs.)	triplet length (trad.)	triplet length (adolfs.)	probabilities for prior odds p(b_i=1)/p(b_i=0) = 5E-2				number of non-null topologies with prob > 0.6	most likely topology	probability at max
A	B	C					p(A|{g})	p(B|{g})	p(C|{g})	p(0|{g})
MLP	CMP	CLP	MLP	MLP	2	0	0.999972	6.43955e-23	3.93371e-07	2.80726e-05	1	MLP	1
MLP	CMP	MEP	CMP	CMP	2	4	8.14378e-09	1	1.18927e-71	2.80907e-10	1	CMP	1
MLP	CMP	GMP	CMP	undefined	2	4	0.601795	0.398205	1.27148e-104	5.24896e-14	2	CMP	1
MLP	CMP	FrA	MLP	MLP	3	5	0.999999	5.96384e-18	1.53307e-24	9.77144e-07	1	MLP	1
MLP	CMP	ETP	MLP	MLP	3	5	0.999917	2.36746e-17	1.07791e-21	8.30618e-05	1	MLP	0.999984
MLP	CMP	LT	MLP	LT	4	5	0.918359	4.42471e-08	0.000127958	0.0815125	1	MLP	0.94031
MLP	CMP	ST	MLP	ST	3	3	0.433878	0.00602257	0.0201319	0.539968	1	ST	0.769586
MLP	CMP	MPP	MLP	MLP	2	3	0.966932	2.84402e-07	0.00378965	0.0292783	1	MLP	0.985315
MLP	CMP	FrBC	MLP	MLP	4	6	0.999999	9.48149e-12	2.80729e-46	1.30366e-06	1	MLP	1
MLP	CLP	MEP	MLP	MLP	3	5	1	6.65461e-09	6.00717e-216	1.05996e-19	1	MLP	1
MLP	CLP	GMP	MLP	MLP	3	2	1	8.02148e-18	5.01915055692960e-311	3.4872e-34	1	MLP	1
MLP	CLP	FrA	CLP	CLP	2	2	6.79946e-18	0.991652	0.000824781	0.00752361	1	CLP	1
MLP	CLP	ETP	CLP	CLP	2	2	0.00275763	0.0158203	1.22345e-07	0.981422	1	CLP	0.628369
MLP	CLP	LT	MLP	MLP	4	4	0.0927613	5.64386e-13	2.07092e-27	0.907239	1	MLP	1
MLP	CLP	ST	MLP	MLP	3	3	0.999974	2.32939e-13	2.25448e-24	2.64217e-05	1	MLP	1
MLP	CLP	MPP	MLP	MLP	2	2	0.997141	4.16382e-09	1.47941e-06	0.00285732	1	MLP	1
MLP	CLP	FrBC	CLP	CLP	3	3	1.58255e-16	0.999996	1.66266e-44	3.87051e-06	1	CLP	0.999998
MLP	MEP	GMP	MLP	MLP	4	5	0.999543	5.62455e-59	2.92624e-135	0.000457261	1	MLP	1
MLP	MEP	FrA	MLP	MLP	4	6	1	8.15688e-168	3.43037e-40	8.07394e-21	1	MLP	1
MLP	MEP	ETP	MLP	MLP	4	6	1	3.94938e-206	4.96431e-10	4.15522e-18	1	MLP	1
MLP	MEP	LT	MLP	LT	5	6	0.969881	5.60233e-223	0.0301193	7.55175e-11	2	MLP	0.999345
MLP	MEP	ST	MLP	ST	4	4	0.000355461	4.34453e-151	0.999645	1.88898e-16	1	ST	1
MLP	MEP	MPP	MLP	MLP	3	4	0.987374	2.38708e-172	0.0126264	1.44389e-16	1	MLP	1
MLP	MEP	FrBC	MLP	MLP	5	7	1	8.7061e-163	5.26331e-26	1.65951e-14	1	MLP	1
MLP	GMP	FrA	MLP	MLP	3	3	1	4.80549e-206	2.98802e-43	1.48333e-30	1	MLP	1
MLP	GMP	ETP	MLP	MLP	3	3	1	3.65892e-282	5.75591e-19	3.93956e-31	1	MLP	1
MLP	GMP	LT	MLP	MLP	5	4	1	0	2.40439e-31	1.2853e-39	1	MLP	1
MLP	GMP	ST	MLP	MLP	4	3	1	5.43017e-243	1.24767e-12	3.44774e-31	1	MLP	1
MLP	GMP	MPP	MLP	MLP	3	2	1	2.14983e-258	4.70243e-10	5.00098e-33	1	MLP	1
MLP	GMP	FrBC	MLP	MLP	4	4	1	2.15873e-272	5.48678e-45	1.64855e-34	1	MLP	1
MLP	FrA	ETP	MLP	MLP	4	4	0.0525557	2.97734e-17	0.00296107	0.944483	0	Null	0.975457
MLP	FrA	LT	MLP	MLP	5	5	0.163912	6.32595e-58	4.8372e-18	0.836088	1	MLP	1
MLP	FrA	ST	MLP	MLP	4	4	1	8.68866e-51	5.58027e-22	1.92158e-09	1	MLP	1
MLP	FrA	MPP	MLP	MLP	3	3	0.999996	1.50589e-41	4.01862e-06	3.6158e-07	1	MLP	1
MLP	FrA	FrBC	FrA	FrA	3	3	5.72533e-49	0.999778	1.71323e-23	0.000221849	1	FrA	0.99988
MLP	ETP	LT	MLP	MLP	5	5	3.11527e-13	8.39857e-27	4.93413e-21	1	0	Null	1
MLP	ETP	ST	MLP	MLP	4	4	0.953803	1.86207e-26	1.27519e-15	0.0461971	1	MLP	0.971463
MLP	ETP	MPP	MLP	MLP	3	3	0.982992	4.65282e-20	0.00728524	0.00972242	1	MLP	0.995964
MLP	ETP	FrBC	MLP	MLP	5	5	3.16746e-08	0.102862	1.7553e-41	0.897138	1	ETP	0.925053
MLP	LT	ST	ST	ST	3	3	1.61428e-20	0.00012589	0.998927	0.000947033	1	ST	0.999971
MLP	LT	MPP	MPP	MPP	3	3	9.84265e-06	3.9971e-10	0.945738	0.0542526	1	MPP	0.948002
MLP	LT	FrBC	MLP	MLP	6	6	0.0941209	3.4768e-20	3.48296e-99	0.905879	1	LT	0.983301
MLP	ST	MPP	MPP	MPP	2	2	0.0134558	1.19722e-05	0.709899	0.276634	1	MPP	0.722388
MLP	ST	FrBC	MLP	MLP	5	5	1	3.80255e-17	1.6468e-82	5.66626e-11	1	MLP	1
MLP	MPP	FrBC	MLP	MLP	4	4	1	1.51675e-10	7.20672e-75	1.8142e-10	1	MLP	1
CMP	CLP	MEP	CMP	CMP	3	5	1	3.80558e-19	9.00359e-57	1.09118e-10	1	CMP	1
CMP	CLP	GMP	CMP	CMP	3	5	1	3.21553e-11	3.40024e-72	1.65851e-11	1	CMP	1
CMP	CLP	FrA	CLP	CLP	3	5	3.18842e-25	0.978613	0.0210206	0.000366526	1	CLP	1
CMP	CLP	ETP	CLP	CLP	3	5	1.11256e-17	0.000208483	0.99128	0.00851172	1	ETP	0.991889
CMP	CLP	LT	LT	LT	8	6	2.46813e-11	3.42119e-15	0.998536	0.0014637	1	LT	0.998744
CMP	CLP	ST	ST	ST	6	4	0.45473	2.43765e-09	0.359723	0.185547	2	ST	0.999999
CMP	CLP	MPP	MPP	MPP	4	4	7.70523e-08	6.40424e-06	0.997417	0.0025763	1	MPP	1
CMP	CLP	FrBC	CLP	CLP	4	6	1.11801e-19	0.999794	3.40847e-13	0.000206224	1	CLP	0.999934
CMP	MEP	GMP	CMP	CMP	2	2	1	9.42628e-30	2.00249e-64	2.08752e-15	1	CMP	1
CMP	MEP	FrA	CMP	CMP	4	6	1	8.10075e-48	4.39019e-36	1.78509e-12	1	CMP	1
CMP	MEP	ETP	CMP	CMP	4	6	1	1.973e-58	1.44408e-21	6.19845e-10	1	CMP	1
CMP	MEP	LT	CMP	CMP	5	3	1	1.67247e-69	4.73268e-10	1.30535e-09	1	CMP	1
CMP	MEP	ST	CMP	CMP	4	2	0.950282	1.79977e-58	0.0497183	1.331e-07	1	CMP	1
CMP	MEP	MPP	CMP	CMP	3	3	1	7.8863e-60	2.61318e-08	1.25149e-08	1	CMP	1
CMP	MEP	FrBC	CMP	CMP	5	7	1	4.42708e-45	7.7283e-37	1.88703e-10	1	CMP	1
CMP	GMP	FrA	CMP	CMP	4	6	1	1.42177e-46	2.24208e-19	1.86005e-09	1	CMP	1
CMP	GMP	ETP	CMP	CMP	4	6	1	1.35093e-69	3.72165e-12	2.07905e-12	1	CMP	1
CMP	GMP	LT	CMP	CMP	5	3	1	2.78184e-118	2.7472e-07	8.52108e-20	1	CMP	1
CMP	GMP	ST	CMP	CMP	4	2	0.998656	7.05017e-88	0.00134389	2.25045e-15	1	CMP	1
CMP	GMP	MPP	CMP	undefined	3	0	0.999765	1.02003e-86	0.000234613	3.98839e-15	1	CMP	1
CMP	GMP	FrBC	CMP	CMP	5	7	1	7.17444e-64	7.11882e-27	1.64006e-14	1	CMP	1
CMP	FrA	ETP	undefined	undefined	0	0	2.07012e-13	1.52514e-12	0.99775	0.00225007	1	ETP	1
CMP	FrA	LT	LT	LT	9	7	3.92408e-07	5.38911e-37	0.999965	3.44981e-05	1	LT	0.999983
CMP	FrA	ST	ST	ST	7	5	0.977159	1.15272e-29	0.0225801	0.000261154	2	CMP	0.990787
CMP	FrA	MPP	MPP	MPP	5	5	5.46748e-05	6.01706e-22	0.999889	5.63585e-05	1	MPP	1
CMP	FrA	FrBC	FrA	FrA	4	6	1.77413e-29	0.999749	1.10524e-08	0.000251136	1	FrA	0.99975
CMP	ETP	LT	LT	LT	9	7	4.56362e-10	7.33456e-24	0.996836	0.00316416	1	LT	0.996871
CMP	ETP	ST	ST	ST	7	5	0.0885799	1.69133e-22	0.86505	0.0463698	1	ST	0.999258
CMP	ETP	MPP	MPP	MPP	5	5	1.51094e-06	3.47154e-13	0.998342	0.0016567	1	MPP	0.999995
CMP	ETP	FrBC	undefined	undefined	0	0	7.39261e-08	0.929593	1.27075e-18	0.0704066	1	ETP	0.986273
CMP	LT	ST	ST	ST	4	2	1.77702e-07	0.00419797	0.983991	0.0118104	1	ST	1
CMP	LT	MPP	MPP	LT	4	4	2.4909e-06	0.291098	0.00308978	0.705809	1	LT	0.629612
CMP	LT	FrBC	LT	LT	10	8	3.05195e-06	0.99842	3.76156e-54	0.00157687	1	LT	0.999528
CMP	ST	MPP	MPP	ST	3	2	8.23035e-06	0.833244	2.75656e-06	0.166745	1	ST	0.999574
CMP	ST	FrBC	ST	ST	8	6	0.974435	0.0255523	8.61334e-49	1.23646e-05	2	CMP	0.978721
CMP	MPP	FrBC	MPP	MPP	6	6	0.0427387	0.957225	9.93741e-38	3.67883e-05	1	MPP	0.99999
CLP	MEP	GMP	undefined	undefined	0	0	3.90806e-38	1.90629e-37	2.52659e-82	1	0	Null	1
CLP	MEP	FrA	CLP	CLP	4	6	0.950721	4.48162e-165	0.0492795	8.49025e-14	1	CLP	1
CLP	MEP	ETP	CLP	CLP	4	6	8.26365e-16	2.55104e-182	1	1.70749e-18	1	ETP	1
CLP	MEP	LT	LT	LT	9	7	4.88218e-37	1.09167e-174	1	2.85877e-17	1	LT	1
CLP	MEP	ST	ST	ST	7	5	9.11475e-18	1.38887e-114	1	4.49151e-16	1	ST	1
CLP	MEP	MPP	MPP	MPP	5	5	1.91228e-09	1.27243e-136	1	8.27409e-16	1	MPP	1
CLP	MEP	FrBC	CLP	CLP	5	7	0.426723	7.22551e-154	0.573277	9.77952e-09	1	FrBC	0.999998
CLP	GMP	FrA	CLP	CLP	4	3	0.772828	3.30515e-195	0.227172	6.33383e-21	1	CLP	1
CLP	GMP	ETP	CLP	CLP	4	3	2.48073e-14	4.57945e-228	1	2.61641e-24	2	ETP	1
CLP	GMP	LT	LT	LT	9	7	2.52122e-26	3.1884e-280	1	2.55798e-22	1	LT	1
CLP	GMP	ST	ST	ST	7	5	1.03066e-08	1.44829e-170	1	1.04331e-17	2	ST	1
CLP	GMP	MPP	MPP	MPP	5	4	1.74161e-07	3.20998e-191	1	1.47995e-22	1	MPP	1
CLP	GMP	FrBC	CLP	CLP	5	7	1	3.74172e-228	6.24886e-10	5.00789e-23	1	CLP	1
CLP	FrA	ETP	CLP	CLP	2	2	0.956698	0.0295132	1.61696e-24	0.0137887	1	CLP	1
CLP	FrA	LT	CLP	CLP	5	5	0.999949	4.22962e-05	3.84609e-39	8.22997e-06	1	CLP	1
CLP	FrA	ST	CLP	CLP	4	4	0.999655	0.000308949	3.51402e-38	3.64889e-05	1	CLP	1
CLP	FrA	MPP	CLP	CLP	3	3	0.999086	0.000188752	9.42126e-21	0.000725343	1	CLP	1
CLP	FrA	FrBC	FrA	FrA	2	2	1.53293e-08	0.999863	2.1589e-22	0.000137384	1	FrA	0.999996
CLP	ETP	LT	CLP	CLP	5	5	7.08488e-23	0.00900258	1.70975e-21	0.990997	0	Null	1
CLP	ETP	ST	CLP	CLP	4	4	1.41376e-10	0.999492	4.28982e-26	0.00050761	1	ETP	0.999978
CLP	ETP	MPP	CLP	CLP	3	3	6.61424e-07	0.918953	1.17758e-08	0.0810464	1	ETP	0.925812
CLP	ETP	FrBC	CLP	CLP	3	3	0.32839	4.20035e-13	4.46862e-28	0.67161	1	CLP	0.972781
CLP	LT	ST	ST	ST	4	4	1.7444e-49	0.999997	1.45912e-10	3.24374e-06	1	LT	1
CLP	LT	MPP	MPP	MPP	4	4	1.63978e-22	0.000826785	0.00171073	0.997462	0	MPP	0.50499
CLP	LT	FrBC	CLP	CLP	6	6	0.999995	2.51182e-32	6.78162e-38	4.83722e-06	1	CLP	0.999995
CLP	ST	MPP	MPP	MPP	3	3	4.6988e-20	8.17248e-08	0.999858	0.00014178	1	MPP	1
CLP	ST	FrBC	CLP	CLP	5	5	0.999998	4.23983e-30	1.20166e-29	2.18303e-06	1	CLP	0.999999
CLP	MPP	FrBC	CLP	CLP	5	5	1	1.58351e-21	5.32381e-32	2.10735e-07	1	CLP	1
MEP	GMP	FrA	undefined	undefined	0	0	2.71544e-28	1.84835e-44	9.57348e-71	1	1	GMP	0.902497
MEP	GMP	ETP	undefined	undefined	0	0	1.12155e-46	9.36297e-86	0.999999	5.53612e-07	1	ETP	1
MEP	GMP	LT	LT	LT	10	6	2.11777e-37	2.54066e-152	0.00824178	0.991758	1	LT	1
MEP	GMP	ST	ST	ST	8	4	9.63351e-50	5.68794e-120	1	9.10898e-22	1	ST	1
MEP	GMP	MPP	MPP	undefined	6	0	8.44252e-44	7.05988e-108	1	3.74445e-12	1	MPP	1
MEP	GMP	FrBC	undefined	undefined	0	0	8.59946e-36	6.29066e-127	5.73623e-45	1	0	Null	1
MEP	FrA	ETP	undefined	undefined	0	0	6.82656e-142	7.81223e-32	1	1.45989e-17	1	ETP	1
MEP	FrA	LT	LT	LT	10	8	1.71064e-134	9.44709e-86	1	1.34282e-20	1	LT	1
MEP	FrA	ST	ST	ST	8	6	3.90033e-90	6.50743e-46	1	8.21131e-18	1	ST	1
MEP	FrA	MPP	MPP	MPP	6	6	3.18437e-110	7.84883e-32	1	5.00003e-17	1	MPP	1
MEP	FrA	FrBC	FrA	FrA	5	7	4.43856e-146	2.55363e-05	0.999974	4.79462e-11	2	FrBC	1
MEP	ETP	LT	LT	LT	10	8	6.16037e-199	5.57265e-24	1	1.33104e-15	1	LT	1
MEP	ETP	ST	ST	ST	8	6	1.5518e-128	1.4235e-21	1	8.10517e-17	1	ST	1
MEP	ETP	MPP	MPP	MPP	6	6	1.41556e-145	2.05802e-10	1	1.37879e-15	1	MPP	1
MEP	ETP	FrBC	undefined	undefined	0	0	2.86794e-142	1	2.25018e-09	7.69633e-10	1	ETP	1
MEP	LT	ST	ST	ST	5	3	7.27544e-178	8.17432e-08	1	2.74286e-19	1	ST	1
MEP	LT	MPP	MPP	LT	5	5	1.98377e-173	0.979218	0.0207823	1.69033e-11	1	LT	0.999998
MEP	LT	FrBC	LT	LT	11	9	4.3085e-139	1	2.03894e-42	2.27309e-07	1	LT	1
MEP	ST	MPP	MPP	ST	4	3	6.60109e-133	0.999997	2.74554e-06	1.34226e-14	1	ST	1
MEP	ST	FrBC	ST	ST	9	7	5.7928e-90	1	8.08902e-37	1.11574e-14	1	ST	1
MEP	MPP	FrBC	MPP	MPP	7	7	2.63246e-101	1	4.58335e-22	3.70501e-10	1	MPP	1
GMP	FrA	ETP	undefined	undefined	0	0	1.59746e-149	2.06927e-28	1	3.20123e-19	2	ETP	1
GMP	FrA	LT	LT	LT	10	7	2.93292e-175	4.83839e-53	1	4.99335e-18	1	LT	1
GMP	FrA	ST	ST	ST	8	6	2.53325e-107	6.60664e-26	1	4.36585e-14	1	ST	1
GMP	FrA	MPP	MPP	MPP	6	5	2.25438e-129	3.01295e-20	1	5.93768e-19	1	MPP	1
GMP	FrA	FrBC	FrA	FrA	5	4	3.53884e-178	0.998619	0.00138121	5.99941e-17	2	FrBC	1
GMP	ETP	LT	LT	LT	10	7	2.6114e-273	0.00153138	0.998469	2.1592e-20	2	ETP	1
GMP	ETP	ST	ST	ST	8	6	5.00556e-172	4.25797e-10	1	6.97171e-21	2	ETP	1
GMP	ETP	MPP	MPP	MPP	6	5	7.51595e-185	1.31208e-05	0.999987	6.31931e-24	2	ETP	1
GMP	ETP	FrBC	undefined	undefined	0	0	7.29868e-204	1	3.31531e-17	2.45326e-23	1	ETP	1
GMP	LT	ST	ST	ST	5	3	8.28218e-289	1.31579e-05	0.999987	3.30068e-35	1	ST	1
GMP	LT	MPP	MPP	MPP	5	4	4.09781e-276	0.00904692	0.990953	3.32638e-31	1	MPP	1
GMP	LT	FrBC	LT	LT	11	9	2.57533e-246	1	8.31223e-37	6.58037e-17	1	LT	1
GMP	ST	MPP	MPP	ST	4	3	1.25705e-196	0.943512	0.0564878	1.96623e-25	1	ST	1
GMP	ST	FrBC	ST	ST	9	7	3.85873e-146	1	2.13975e-28	1.20851e-19	1	ST	1
GMP	MPP	FrBC	MPP	MPP	7	6	1.18882e-158	1	1.85016e-20	7.9913e-23	1	MPP	1
FrA	MPP	FrBC	FrA	FrA	4	4	0.999969	2.2549e-35	7.57736e-17	3.10687e-05	1	FrA	0.999969
FrA	ST	FrBC	FrA	FrA	5	5	0.999692	3.91864e-48	6.69447e-15	0.000308209	1	FrA	0.999922
FrA	ST	MPP	MPP	MPP	4	4	6.05479e-55	3.25873e-07	1	2.39522e-08	1	MPP	1
FrA	LT	FrBC	FrA	FrA	6	6	0.98935	6.59334e-45	1.78091e-12	0.0106499	1	FrA	0.999907
FrA	LT	MPP	MPP	MPP	5	5	5.05133e-65	0.377462	0.619828	0.00271054	2	MPP	1
FrA	LT	ST	ST	ST	5	5	1.35693e-100	1	6.42227e-13	2.59282e-12	1	LT	1
FrA	ETP	FrBC	FrA	FrA	3	3	0.635055	2.16622e-34	6.65024e-12	0.364945	1	FrA	0.986813
FrA	ETP	MPP	MPP	MPP	6	6	1.95774e-23	0.999924	2.5222e-07	7.61008e-05	1	ETP	1
FrA	ETP	ST	ST	ST	8	8	1.9336e-28	1	5.69125e-23	2.28231e-07	1	ETP	1
FrA	ETP	LT	LT	LT	10	10	7.63515e-50	0.998892	1.4409e-16	0.00110761	1	ETP	1
ETP	MPP	FrBC	MPP	MPP	7	7	0.999998	3.82264e-11	1.10311e-41	1.6468e-06	1	ETP	1
ETP	ST	FrBC	ST	ST	9	9	1	1.00024e-20	1.11031e-41	2.54143e-07	1	ETP	1
ETP	ST	MPP	MPP	MPP	4	4	8.65288e-26	4.63107e-06	0.999367	0.000628677	1	MPP	0.999996
ETP	LT	FrBC	LT	LT	11	11	0.223555	8.02078e-17	4.01937e-58	0.776445	0	Null	1
ETP	LT	MPP	MPP	MPP	5	5	8.91745e-28	0.000987076	0.0107684	0.988245	1	MPP	0.666524
ETP	LT	ST	ST	ST	5	5	2.33911e-57	0.999891	1.20662e-05	9.67571e-05	1	LT	0.999898
LT	ST	MPP	ST	ST	2	2	0.000166069	0.984544	3.48493e-08	0.0152899	1	ST	0.997514
LT	ST	FrBC	ST	ST	6	6	1	1.38626e-10	9.44554e-116	4.56036e-10	1	LT	1
LT	MPP	FrBC	MPP	MPP	6	6	0.996729	0.00275138	6.75211e-87	0.000519632	1	LT	0.996993
ST	MPP	FrBC	MPP	MPP	5	5	0.00138697	0.998613	2.79477e-71	6.69748e-08	1	MPP	1
