# Supplementary material for: Discovering sparse transcription factor codes for cell states and state transitions during development
Source: eLife. 2017 Mar 15;6:e20488. doi: 10.7554/eLife.20488 (PMC5352226; doi:10.7554/eLife.20488)
Supplement: Figure 2—source data 3. — Listed are, for crucial triplets along the lineage tree, the 200 genes with the highest probabilities of belonging to the two transition gene classes and the root marker class, and their associated probabilities. DOI: http://dx.doi.org/10.7554/eLife.20488.011 [file elife-20488-fig2-data3.xlsx]

## Sheet: Sheet1
CMP -- LT -- MPP		CMP -- ST -- MPP						MEP -- CMP -- GMP						GMP -- MPP -- CLP		GMP -- MLP -- CLP						ETP -- CLP -- FrA						CLP -- FrA -- FrBC
TF name	p(LT marker|data,T)	TF name	p(ST marker|data,T)	TF name	p(transition|data,T)	TF name	p(transition|data,T)	TF name	p(CMP marker|data,T)	TF name	p(transition|data,T)	TF name	p(transition|data,T)	TF name	p(MPP marker|data,T) (G8)	TF name	p(MLP marker|data,T)	TF name	p(transition|data,T)	TF name	p(transition|data,T)	TF name	p(CLP marker|data,T)	TF name	p(transition|data,T)	TF name	p(transition|data,T)	TF name	p(transition|data,T)
Ndn	0.999984	Mpl	0.779584	Gata1	0.998366	Hlf	0.982098	Zbtb20	0.991388	Nsbp1	0.999001	Satb1	0.999904	Atoh1	0.995273	Dach1	0.997161	Cebpa	0.999984	Tcf4	1	Meis1	0.826083	Nfatc2	0.874486	Ebf1	1	Runx2	0.999984
Id2	0.999867	Rai14	0.759619	Dach1	0.933798	Tsc22d1	0.979288	Dach1	0.963223	Mga	0.998692	Lass6	0.999489	Ikzf2	0.96458	Nfix	0.984347	Tcfec	0.99957	Satb1	1	Cdc5l	0.69507	Nr1d2	0.870131	Irf8	1	Ikzf2	0.998203
Egr1	0.999796	Tcfec	0.493136	Gata2	0.913021	Hoxa9	0.813548	Pbx1	0.950631	Zfp292	0.997941	Stat4	0.999435	Jun	0.959966	Ikzf2	0.964467	Polr2l	0.989974	Mef2c	0.999997	Zfp192	0.68725	Ikzf2	0.707267	Hdac9	0.999938	Nfil3	0.997703
Fus	0.960906	Lass6	0.332598	Zbtb16	0.882524	Irf2	0.704691	Mef2c	0.948259	Mll3	0.996342	Sfpi1	0.998766	Hlf	0.955601	Hlf	0.95517	Clpb	0.981434	Zbtb20	0.999996	Pias2	0.480278	Nfkbib	0.517328	Pax5	0.99752	Smarca2	0.993803
Lass4	0.942498	Pfdn1	0.273788	Pbx1	0.867619	Maged1	0.550428	Aff3	0.944941	Mllt3	0.995477	Irf8	0.998152	Taf1a	0.955235	Zfpm1	0.939217	Gfi1	0.979223	Aff3	0.99999	Phf14	0.450957	Mycn	0.474234	Mycl1	0.992914	Tsc22d1	0.993423
Cbx7	0.939604	Meis1	0.248083	Zfpm1	0.712155	Esr1	0.547985	Hhex	0.914163	Tcf4	0.994567	Cebpa	0.996973	Mpl	0.954983	Nfic	0.936274	Pdlim1	0.944374	Zfp292	0.99999	Zbtb20	0.359755	Zfp637	0.443653	Ddx54	0.987061	Hoxa9	0.993066
Mycn	0.92833	Lass4	0.244682	Gfi1b	0.553078	Nfatc2	0.536131	Smarca2	0.91321	6330416L07Rik	0.993483	Lass5	0.994947	Lass4	0.948087	Zfp295	0.933235	Nfe2	0.904135	Mll5	0.999985	Hmg20a	0.351097	Zkscan14	0.403152	E2f2	0.983544	Irf8	0.988047
Mpl	0.92355	Nfat5	0.24391	Pdlim1	0.256753	Hmg20a	0.439559	Gata2	0.90298	Zbtb1	0.993463	Bmyc	0.987598	Klf10	0.931816	Lmo2	0.929015	Tysnd1	0.89886	Arid4a	0.999985	Zfp148	0.26495	Zfp59	0.357809	Esr1	0.841186	Prdm5	0.984866
Tsc22d3	0.919171	Ctbp2	0.233716	Shank3	0.202077	Irf5	0.348529	Zfp238	0.889802	Lcorl	0.991394	Rel	0.987351	Lmo2	0.84143	Klf10	0.913076	Men1	0.893001	Mll1	0.999978	Shprh	0.264223	Hoxa9	0.338466	Fmnl2	0.807554	Meis1	0.977556
Sfrs5	0.913778	Yy1	0.206147	Tle6	0.153539	Erg	0.347687	Sry	0.873334	Atm	0.988854	Lbh	0.986891	Zfp110	0.740044	Atf1	0.900666	Psmd9	0.818719	Mef2a	0.999976	Mef2c	0.243794	Jmy	0.335646	Cdkn2c	0.628927	Mycl1	0.972445
Fli1	0.912075	Mycn	0.205408	Hmgb3	0.145036	Notch1	0.346335	Smad5	0.862036	Sp4	0.987331	Elk3	0.982882	Pbx4	0.705785	Lass4	0.861041	Nfkbib	0.818031	Notch1	0.999974	Taf10	0.230177	Nmi	0.251738	Tcf19	0.441457	Nfatc2	0.965847
Atf4	0.907038	Smarca2	0.205162	Tcfe3	0.0931904	Hnf4a	0.342431	Lass4	0.828122	Bclaf1	0.986563	Fli1	0.982058	Polr3e	0.667325	Limd1	0.855581	Rxrb	0.814803	Irf2	0.999967	Nfil3	0.210561	Ddx58	0.248373	Arid3a	0.397927	Zbtb16	0.93319
Foxo1	0.904223	Wasl	0.191787	Stat5a	0.0922115	Gpkow	0.342315	Ikzf2	0.790464	Ash1l	0.986382	Arid5b	0.979631	Zdhhc21	0.659925	Taf1a	0.829253	Ruvbl2	0.801255	Mll3	0.999959	Trip13	0.204656	Mki67ip	0.230606	Gas7	0.385658	Ctbp2	0.869093
Rai14	0.897825	Ccnc	0.175328	Asb1	0.0881635	Irf7	0.309459	Grlf1	0.742926	Zfp445	0.985253	Hdac5	0.960771	Ing3	0.608738	Stat3	0.798982	Gata2	0.787218	Nfat5	0.999938	Fem1a	0.195316	Hnf4a	0.222196	Bach2	0.37133	Pbx4	0.840562
Meis1	0.892178	Mllt3	0.168687	Zeb2	0.0705287	Trp53bp1	0.243677	Tef	0.727773	BC003267	0.984795	Etv6	0.952528	Prdm5	0.608085	Tcea1	0.795575	Thra	0.754678	Zmym2	0.999927	Zfp386	0.157122	Sertad2	0.210633	Hmgb2	0.367077	Hnf4a	0.827236
Gata3	0.873211	Ccnk	0.168423	Gata3	0.0648098	Sirt3	0.200536	Elf1	0.724113	Arid4a	0.984009	Esr1	0.947107	Ppp1r13b	0.575495	Nkrf	0.717281	Gata1	0.734126	Tcf7l2	0.999923	Phf21a	0.157097	Tada2l	0.20006	6720489N17Rik	0.355924	Nfic	0.817766
Mllt3	0.865144	Zbtb7a	0.167111	Batf2	0.0605288	Tcfec	0.197115	Smad4	0.722668	Ahctf1	0.983967	Erg	0.941319	Zfp263	0.571143	Myc	0.68446	Stat5a	0.685816	Rfx3	0.999921	Mef2a	0.137504	Gata2	0.180047	Foxm1	0.331287	Ifnar2	0.784357
Zbtb20	0.83761	Nrip1	0.158436	Rb1	0.0541391	Sirt6	0.162869	Stat5a	0.719724	Nr3c1	0.980747	Runx2	0.929916	4933426I21Rik	0.5628	Etv3	0.678052	E2f1	0.685253	Zfp148	0.99992	Brd8	0.13032	Ankrd6	0.174186	Dek	0.288812	Lass6	0.73828
Nfkbiz	0.826091	Smad3	0.148057	Pbx3	0.0399775	Fmnl2	0.134759	Myst4	0.711917	Shprh	0.979699	Mpl	0.868763	Ccnt2	0.561215	Gtf2ird1	0.671	Zbtb16	0.67776	Zfp182	0.999906	Rybp	0.124543	Tnfaip3	0.172716	Cebpa	0.280282	Lmo2	0.735167
Cited2	0.825053	Ankrd46	0.145282	Zfp354c	0.0372527	Prdm5	0.127895	Tnfaip3	0.695025	Uhrf2	0.978398	Gfi1	0.850393	6720456H20Rik	0.540505	Crebzf	0.661649	Mybbp1a	0.674743	Bach2	0.999901	Zfp292	0.113028	Polr2e	0.167852	Mef2a	0.2556	Nrip1	0.734901
Nfat5	0.807214	Stat4	0.138259	Zfp81	0.0313433	Hmga2	0.122672	Ikbkg	0.676723	Nfat5	0.976388	Ncoa3	0.831774	Rnf14	0.501612	Cited2	0.646002	Mcm7	0.666235	Ash1l	0.999896	Arid5b	0.111004	Rnf4	0.159654	Pou2af1	0.252515	Hmga2	0.656188
Tcfcp2	0.779689	Hdac8	0.120915	Polr3e	0.0284363	Basp1	0.120735	Cbfb	0.676452	Garnl1	0.976101	Hcls1	0.823523	E2f6	0.49258	Prdm5	0.645939	Cxxc1	0.637976	Crebbp	0.999896	Cebpz	0.106429	Vps72	0.141443	Nfic	0.204219	Bmyc	0.647942
Etv3	0.77361	Smarcb1	0.120232	Ccnc	0.0255687	Ccnk	0.112745	Foxp1	0.673912	Nudt12	0.972785	Zscan2	0.820329	Blzf1	0.487666	Blzf1	0.639108	Smarcb1	0.583793	Mga	0.999892	Zfp113	0.0986084	Ash2l	0.119992	Meis1	0.196677	Glis2	0.620595
Smarca2	0.764771	Gpkow	0.119155	E2f1	0.0247771	Smad3	0.0942202	Etv3	0.639889	Nrip1	0.9701	Cited2	0.801231	Htatsf1	0.473581	Orc2l	0.618952	Hdac10	0.525778	Rel	0.999891	Zfp451	0.0977514	Bbx	0.107033	Zfp524	0.186981	Ahr	0.594937
Tcfec	0.728868	Gfi1b	0.118252	Drap1	0.0241277	Dnmt3a	0.0796335	Ezh1	0.571532	Polr3e	0.967802	Stat3	0.789841	Tada2l	0.470961	Tardbp	0.61573	Batf	0.523491	Fmnl2	0.999873	Atf6	0.0895943	Ciao1	0.102887	Arhgap17	0.167885	Mycn	0.548748
Mll5	0.715367	Sirt6	0.115892	Zfp748	0.0240485	Bcl3	0.07715	Runx1	0.530826	Bcl11a	0.960849	Nfkbie	0.780682	Mycn	0.449031	Tfam	0.604217	Mcm5	0.519961	Bcl11a	0.999854	Ncoa6	0.086105	Smad1	0.102451	Tcf4	0.0960295	Id2	0.540949
Zdhhc1	0.706575	Gtf2ird1	0.107914	Arid3a	0.0225095	Mpl	0.0734602	Ikbkb	0.500222	Zeb1	0.960334	Meis1	0.776883	Cnbp	0.44745	Gtf2e1	0.598251	Polr2f	0.509129	Trps1	0.999841	Rsrc1	0.0837947	Aatf	0.0990635	BC003267	0.0735896	Supt3h	0.531373
Prdm16	0.697385	Basp1	0.105659	Mycbp	0.0220411	Nr2c2	0.0667255	Trp53bp1	0.46022	Zfp748	0.958148	Zfp36	0.749485	Hnf4a	0.434993	E2f3	0.596535	Gtf2f1	0.505363	Phf14	0.999823	Ankrd49	0.0802629	Pogk	0.0895412	Rab18	0.0662554	Cebpa	0.51944
Per1	0.686279	Pdlim1	0.104607	Nrip1	0.0218548	Ctbp2	0.0647497	Zfp109	0.459822	Zmym2	0.957405	Sh3pxd2b	0.747812	Rfx5	0.429426	Smad1	0.593625	Atf4	0.496633	Runx2	0.999816	Cnot7	0.0801035	Prdm5	0.0866121	Fev	0.0615165	Basp1	0.472434
Keap1	0.679098	Krr1	0.103234	Tceb3	0.0214957	Nfkbie	0.0624043	Mecp2	0.458002	Rbm39	0.951316	Mycn	0.727936	Zfp161	0.427991	Ccnt2	0.565238	Ctnnbl1	0.478786	Bbx	0.999792	Pou2f1	0.0739015	Rfx5	0.0771992	Phf14	0.0572609	Etv6	0.438689
Klf6	0.647227	Polr2h	0.100042	Med31	0.0201898	Zdhhc6	0.0604972	Sox4	0.455192	Zfp281	0.949862	Phf21a	0.713266	Zfp84	0.406336	Krr1	0.557194	Hdac3	0.47046	Atm	0.999784	Papolg	0.0725151	Lmo2	0.0768024	Zfp182	0.0525887	Cebpb	0.382769
Polr2h	0.636428	Nmi	0.098401	Bcorl1	0.0188649	Tcf7l2	0.0573091	Anks3	0.445422	Mll1	0.947892	Hnf4a	0.618187	Ankrd10	0.382032	Scmh1	0.556489	Zfp593	0.452598	Phf21a	0.999781	Hipk2	0.0719821	Ar	0.0766332	Zeb2	0.0489061	Trerf1	0.376646
Nfe2	0.61733	Trp53bp1	0.0957641	Ankrd49	0.0184325	Arid5b	0.0549694	Arid1a	0.434853	Jmy	0.946594	Notch1	0.60424	Atxn3	0.376895	E2f4	0.535051	Ppp5c	0.437006	Zfp386	0.999769	Ncoa5	0.0715994	Tceb3	0.0675626	Pou2f1	0.0444292	Nfix	0.320632
Atoh1	0.608219	Pias1	0.0956179	Sry	0.0172061	Gfi1	0.0538384	Pbxip1	0.42894	Rb1	0.942772	Nfatc1	0.591946	Bard1	0.370843	Nfe2l2	0.527444	Ptges2	0.42739	Brwd1	0.999697	Lass6	0.0711425	Nfix	0.0651211	Ankrd22	0.0431787	Runx3	0.305937
Hcls1	0.606733	Ddx58	0.0952244	Sap30bp	0.0164387	Smarca2	0.0522203	Trim30	0.423913	Rybp	0.934057	Smad1	0.585235	Cbx3	0.355757	Sfrs5	0.527126	L3mbtl2	0.407763	Foxp1	0.999695	Smarca2	0.0709533	Gata3	0.063531	Pou2f2	0.040529	Sirt3	0.297179
Zfp36	0.596732	Nr2c2	0.0920106	Zbtb7a	0.0156626	Stat4	0.0519799	Rfx5	0.397955	1810007M14Rik	0.930352	Zbtb16	0.575986	Tardbp	0.354609	Zdhhc21	0.526056	Gcdh	0.405256	Pou2f1	0.999594	Zfp410	0.0702189	Rabl3	0.063369	Klf3	0.0291043	Batf	0.266735
Mapk3	0.589567	Zfp263	0.0912923	Ppargc1b	0.0156147	Trps1	0.0500211	Bach1	0.38991	Ankrd32	0.929475	Sox4	0.557958	Ankrd49	0.350023	Taf5l	0.521979	Xab2	0.376976	Ddx58	0.999572	Fmnl2	0.0665236	Ruvbl1	0.0577818	Rnf141	0.0275527	Eid2	0.264062
Phf1	0.588117	Maged1	0.0910284	Taf10	0.015471	Glis2	0.0491022	Nfya	0.36247	Dmtf1	0.923589	Hlf	0.512386	Tcea1	0.327644	Bach1	0.521937	Rab1b	0.368334	Rybp	0.999547	Arid4a	0.0661735	Mybbp1a	0.0555211	Tcfeb	0.0260457	B930041F14Rik	0.238076
Clip2	0.57458	Mid1	0.089209	Siah2	0.0154313	Eid2	0.0473354	Zeb2	0.356678	Mll5	0.92305	Ppp1r13b	0.478724	Krr1	0.327389	Trp53	0.508218	Hif1an	0.367252	Shprh	0.999541	Nfic	0.0646375	L3mbtl2	0.0517557	Hoxb3	0.0258926	Nr2c1	0.236165
Stat4	0.571545	Papolg	0.0891862	Pcgf2	0.015304	Hdac8	0.0458535	Ddx58	0.346544	Dek	0.918592	Arhgap17	0.456343	Pcgf6	0.303084	Ctbp2	0.505741	Abt1	0.35053	Tsc22d1	0.999421	Foxj2	0.0643319	Rel	0.0497012	Lin28	0.0255786	Msrb2	0.214138
Klf10	0.563274	Nfe2	0.0853096	Carhsp1	0.0152639	Ankrd46	0.0451679	Gabpb1	0.34618	Zfp451	0.910892	Lmo4	0.448582	Cops2	0.302058	Nfx1	0.503594	Pla2g6	0.340122	BC003267	0.999389	Hltf	0.0632043	Polr2g	0.0474166	Pbx1	0.02255	Satb1	0.193805
Atxn3	0.555546	Ikzf2	0.0849849	Zbtb3	0.0145552	Ankrd10	0.0442559	Lsm11	0.343011	Mid1	0.908244	Runx1	0.435129	Gtf2e2	0.300246	Basp1	0.498301	Polr3d	0.327701	Mllt3	0.999318	Pdcd11	0.0605063	Dcp1a	0.0471119	Ets1	0.0217264	Ssbp2	0.188889
Msrb2	0.550536	Fusip1	0.083156	Tmem131	0.0139816	Ppard	0.0437646	Mycn	0.306918	Zfp68	0.907928	Foxp4	0.420831	Etv3	0.297183	Strap	0.489582	Pcgf2	0.320518	Lcorl	0.999202	Tial1	0.0601193	Cebpz	0.0467566	Atf6	0.0206512	Zdhhc1	0.156661
Ets1	0.545384	Tsg101	0.0831036	Zfp248	0.0136983	Rai14	0.0416789	Baz2a	0.266302	Wwp1	0.907562	Hoxa7	0.37803	Phtf1	0.296623	Htatsf1	0.486572	Nfatc2ip	0.308631	Sp4	0.999107	Zfp59	0.0582501	Blzf1	0.0462477	Arntl	0.0197804	Fmnl2	0.131772
Xbp1	0.522049	Tada2l	0.083098	Ube2w	0.0135254	Rel	0.0413187	Rbpj	0.261565	Cebpg	0.90306	Ostf1	0.353517	Ing1	0.288728	Taf3	0.483673	Phf5a	0.296822	Hltf	0.998917	Pou2f2	0.0579747	Erf	0.0458547	Mxd3	0.0185492	Zfp523	0.102041
Creb3	0.518345	Tob1	0.0807406	Rps6ka4	0.0132439	Nfat5	0.0403029	Jun	0.260471	Mtf2	0.89987	Phf13	0.347279	Crebzf	0.288521	Fem1b	0.469227	Zfp637	0.254517	Zbtb1	0.99887	Mll5	0.0575713	Gfi1	0.0440776	Mta2	0.0184056	Zfp661	0.0947723
Zfp1	0.51431	Per3	0.0791077	Nkrf	0.0130766	Nmi	0.0384921	Meis1	0.254317	Hltf	0.897969	Cdkn2d	0.299609	Tsg101	0.282927	Ssbp3	0.453336	Ruvbl1	0.24612	Smarca2	0.998824	Tcf4	0.0575518	Ppp5c	0.043299	Foxj2	0.0179326	Zdhhc15	0.0925316
Eid2	0.511968	Men1	0.0782774	Zdhhc16	0.0129264	Clip2	0.0364969	Hipk2	0.242571	Aebp2	0.89717	Vax1	0.291829	Ttrap	0.28251	Tada2l	0.444268	Mybl2	0.236315	Ncoa2	0.998739	Ssbp2	0.0571515	Cnot7	0.0418968	Foxe3	0.0179049	Notch2	0.0695871
Zfp606	0.485647	Supt3h	0.0762415	Sox13	0.0127221	Hoxa7	0.0362502	Crebbp	0.239721	Creb1	0.89596	Fosl2	0.284939	Taf3	0.281082	Gtf2i	0.432323	Lsm11	0.23171	Hdac9	0.998461	Rfc1	0.0545325	Zfp1	0.04047	Nfe2l3	0.0168224	Zfp109	0.0601569
Smad3	0.48273	Prdm5	0.0740305	Arntl	0.0123557	Klf6	0.0324367	Sp1	0.233565	Taf1	0.890842	B930041F14Rik	0.276062	Gtf2h1	0.277041	Rsrc1	0.422957	Trip6	0.222152	Elk4	0.998395	Nmi	0.047109	Smad2	0.0397723	Taf10	0.0157422	Clip2	0.0556515
Nr1d2	0.472014	Tshz1	0.0735156	Sra1	0.0120344	Zfp1	0.0317656	Zfp398	0.228453	Pms1	0.889671	Tsc22d4	0.275578	Rab8b	0.268828	Ptma	0.420166	Tcfap4	0.20763	Zfp192	0.998332	Trim30	0.0463078	Ppp1r13b	0.039722	Runx2	0.0155284	Zkscan1	0.0516958
Rfxap	0.456815	Sap30bp	0.0700076	Polr3h	0.0119576	Nkx2-3	0.0307539	Zfp263	0.225836	Zfp386	0.887742	Hoxa9	0.272024	Zdhhc1	0.263579	Aatf	0.412388	Sox12	0.203596	Zmynd11	0.998231	Grlf1	0.0424811	Ercc2	0.0395214	Zfp90	0.0122887	Nfe2	0.0515285
Atf7ip	0.428227	Prr3	0.0699539	Zfp398	0.0119383	Purb	0.0282737	Tcf20	0.219378	Papola	0.886409	Prdm5	0.266943	Taf1b	0.260667	Ing3	0.405846	Polr2d	0.202065	Zfp606	0.99823	Zkscan3	0.0415856	Zfp566	0.0379097	Lcorl	0.0121948	Sox14	0.046039
Ppp1r13b	0.420634	Med31	0.0695731	Phf10	0.0109753	Smarcb1	0.0277271	Bbx	0.219248	Ankhd1	0.876759	Batf	0.262703	Ctbp2	0.253038	Ppp1r13b	0.405411	Hsf1	0.194834	Esr1	0.997727	Drg1	0.0397658	Abt1	0.0370264	Cited1	0.0114813	Klf5	0.0454564
Sqstm1	0.409699	E2f3	0.0685918	Ncoa1	0.0107465	Meis1	0.0274966	Zscan21	0.217118	Phf14	0.873584	Nr2f6	0.258334	Tmpo	0.249871	Ankrd49	0.401903	Polr2e	0.194121	Zeb1	0.997604	Plagl2	0.0380749	Gtf2h3	0.036245	Cbx7	0.0110946	Gfi1b	0.0448044
Zfp263	0.399176	Cdc5l	0.0674635	Taf12	0.0106128	Krr1	0.0271674	Tle4	0.215212	Narg1	0.872382	Tcea2	0.228927	Prkar1a	0.249112	Atxn3	0.398673	Six5	0.191555	Cebpz	0.997256	Sertad2	0.0347469	Zdhhc16	0.0361794	Mbd2	0.0104747	Hoxa4	0.0402012
Phf21a	0.39475	Max	0.0673204	Mynn	0.0104625	Mllt3	0.0269146	Rab11a	0.208127	Zfp59	0.866434	Arid3a	0.227216	Bmi1	0.24867	Zfp84	0.392515	Xbp1	0.177677	Elf1	0.997213	Ctbp2	0.0345223	Clock	0.0349072	Brd8	0.00918492	Mafg	0.0400711
Rab11a	0.384661	Ubn1	0.0672717	6330416L07Rik	0.0101811	Gtf2ird1	0.0266581	Notch2	0.206831	Sirt1	0.862902	Sirt3	0.214515	Ssbp2	0.246185	Yy1	0.392422	Scand1	0.176963	Myst3	0.997213	Garnl1	0.0337533	Zfp410	0.0345301	Pdcd11	0.00877054	Rara	0.0320818
Mafg	0.378487	Rfx5	0.0671477	Nfkbib	0.0100775	Cebpb	0.0257115	Polr2e	0.202294	Ccnt2	0.862774	Usf1	0.213228	Msrb2	0.245102	Pcgf6	0.383686	Bpnt1	0.176893	Ikzf1	0.997132	B3gat3	0.0333829	Zfp451	0.0342448	Taf13	0.00851873	Hoxb3	0.0273312
Gtf2h1	0.377855	Atxn3	0.0662539	Lmo4	0.00992008	Ssbp2	0.0245713	Runx3	0.190744	Ncoa2	0.860482	Zswim4	0.211646	Zfp1	0.244078	Trerf1	0.367602	Zfp61	0.174525	1810007M14Rik	0.997016	Nfix	0.0308697	Klf10	0.0336413	Phf1	0.00845282	Trps1	0.0264688
Arnt	0.37625	Rab11a	0.0658418	Sp4	0.00977203	Tob1	0.0238137	Pias4	0.188524	Brwd1	0.855668	Nfic	0.204661	Nmi	0.243384	Smad5	0.367579	Dpf2	0.171952	Ncor1	0.996979	Aatf	0.0306501	Zdhhc1	0.0336094	Lass6	0.00832238	Sox13	0.0212645
Lass5	0.369794	Mynn	0.0657456	Zfp647	0.00975551	Sox4	0.023686	Stat1	0.186969	Tmem131	0.855354	Zfp319	0.204395	Zfp109	0.242748	Rfx5	0.353769	Th1l	0.162022	Garnl1	0.996967	Smad2	0.030193	Etv6	0.0321079	Spdef	0.00811733	Fosl2	0.0205447
Cnot7	0.366844	Ppp1r13b	0.063816	Phf8	0.009673	Polr3b	0.0198532	Hif1a	0.185851	Zfpm1	0.854449	Dlx5	0.201815	Zfp191	0.240994	Cops2	0.350896	Polr2g	0.161629	Ppp1r16b	0.996641	Esr1	0.0297444	Arid5b	0.0319555	Zbtb20	0.0073016	Nkx2-5	0.020427
Nkx2-3	0.358567	Zeb1	0.0634899	Thra	0.00954376	Lass6	0.0197899	Hbp1	0.185534	Fem1b	0.850696	Ing4	0.20098	Hmgcs1	0.235518	Mecp2	0.349041	Psmc3	0.158259	Ep300	0.996428	Snapc4	0.0297262	Tsc22d1	0.0311647	Hmga2	0.0072962	Mef2c	0.020223
Rab11b	0.347814	Phf21a	0.0632155	Mid1	0.00939309	Mll5	0.0184601	Stat5b	0.184472	Gata1	0.844017	Tle6	0.187045	Ehmt1	0.226804	Mcm4	0.346156	Ankrd54	0.158226	Myst4	0.996272	Taf1a	0.0290422	Snapc4	0.0293319	Hmx3	0.0071439	Zfp647	0.0201283
Myst4	0.345409	Pknox1	0.0629542	Tnfaip3	0.00936072	Phf21a	0.0169708	Bcor	0.183815	Klf1	0.843515	Lass4	0.186949	Ccnt1	0.217256	Taf1b	0.341508	Znrd1	0.154017	Trim30	0.996048	Phf10	0.0280648	Tgif1	0.0281163	Osgin1	0.00647011	Hic2	0.0153403
Cic	0.335983	Zdhhc6	0.0616268	Ddit3	0.00930493	Zeb1	0.0167427	Emx1	0.176752	Cebpz	0.842224	Foxp1	0.186717	Zfp277	0.213494	Csde1	0.339285	Taf1c	0.152498	Wwp1	0.996034	Ifnar2	0.0278917	Asb3	0.0278907	Msx1	0.00639378	Rarg	0.0152175
Zfp386	0.333516	Tceb3	0.0615744	Trip4	0.00927817	Mycn	0.0163304	Ing4	0.173409	Zfp148	0.839643	Mkl1	0.18415	Gtf2h2	0.210552	Ccnk	0.336983	Ehmt2	0.150246	Ncoa6	0.995979	Mafg	0.0275712	Th1l	0.027579	Barx1	0.00638815	Wwp1	0.014696
Rsrc1	0.329465	Mll5	0.061378	Taf1c	0.00918087	Tcfcp2	0.0156766	Zfp592	0.162207	Zfp36l1	0.836767	Maml1	0.182306	Hif1a	0.210422	Bmi1	0.336716	Mcm2	0.146611	Dido1	0.995946	Pygo2	0.0274864	Phf13	0.027295	Nkx2-5	0.00601436	Lin28	0.014186
Zdhhc6	0.325775	Ccnt1	0.0605839	Ubn1	0.00906773	Zkscan6	0.0151703	Hivep1	0.154975	Myst3	0.831171	Lyl1	0.179523	Ankra2	0.2093	Notch2	0.332213	Zdhhc16	0.138571	Nrip1	0.995933	Taf4a	0.0271701	Zscan2	0.0263081	Evx2	0.00593828	Notch1	0.0140625
Taf1b	0.321058	Ttrap	0.0602423	Sirt1	0.00899342	Ddx58	0.0151335	Hif1an	0.154045	Zfp597	0.825877	Glis2	0.165631	Smad5	0.200085	Khdrbs1	0.328191	Uhrf1	0.129231	Smad7	0.995837	Zfp207	0.0271297	Gtf2ird1	0.0257004	Foxo1	0.00593564	Tcfcp2	0.0133784
Zfp810	0.31897	Tle4	0.0600874	Zbtb48	0.00883085	Men1	0.0142825	6720456H20Rik	0.149199	Mef2a	0.805653	Homez	0.165423	Tfam	0.197797	Ccnt1	0.320492	Psmd10	0.128656	Rfc1	0.995428	Nsbp1	0.0269283	Gtf2f1	0.0245997	Foxk1	0.00569158	Pdcd11	0.012962
Sp4	0.316555	Zfp148	0.0571182	Zfp182	0.00858916	Bmyc	0.0140532	Psmc3	0.148831	Nsd1	0.799405	Hoxb3	0.150686	Ctnnb1	0.197747	Polr3b	0.314505	Mib2	0.126782	Zfp451	0.995221	Zkscan14	0.0267843	Zhx1	0.0244299	Pawr	0.00564904	Zfp192	0.0125696
Elk4	0.308917	Asb8	0.0569077	Tcfeb	0.00842801	Tcf4	0.0130379	Lcor	0.146105	Tcerg1	0.799167	Mxd4	0.148822	Rsrc1	0.197609	Elf2	0.310694	Ssbp4	0.1191	Creb1	0.995063	Usf2	0.0262855	Hsf1	0.0241869	Ncoa1	0.00532949	Aire	0.0117643
Max	0.308243	AW146020	0.0565753	Bcor	0.00835426	Nfkbiz	0.0127019	Zkscan14	0.143392	Suz12	0.793166	Hipk2	0.139542	Ankfy1	0.193849	Hdac2	0.304486	Whsc2	0.118053	Nsbp1	0.994992	Lyl1	0.0262316	Zfp64	0.0235799	Sox14	0.00518227	Sirt4	0.0116324
Men1	0.301103	Hnf4a	0.0555335	Klf7	0.00828577	Ppp1r13b	0.0120228	Stat2	0.138018	Gtf2h1	0.791606	Bcl3	0.135814	Rbpj	0.191569	Ankib1	0.302596	Yaf2	0.114196	Baz2a	0.994598	Phf8	0.0259849	Dnmt3a	0.0219731	B3gat3	0.00518154	Fos	0.0107348
Prdm5	0.299921	Lcor	0.0546735	L3mbtl2	0.0082841	Hmbox1	0.011861	Dido1	0.136688	Smarca5	0.789779	Cbx4	0.131979	Tbpl1	0.18542	Phtf1	0.291574	Polr2j	0.113077	Meis1	0.993235	Ugp2	0.0259045	Zfp113	0.0218229	Zfp148	0.0050863	Pla2g6	0.010679
Ciao1	0.29932	Mecp2	0.0543426	Aatf	0.00825773	Ets2	0.0115603	Ep300	0.133511	Atxn3	0.789546	Zdhhc1	0.131352	Ankib1	0.182971	Bcor	0.286181	Ercc2	0.110922	Nfatc2	0.992884	Ets1	0.0249719	Med31	0.0211056	Zfp39	0.00490262	Pou4f2	0.0100864
Lmo2	0.294024	Dnmt3a	0.0537553	Nfe2	0.00810293	Wasl	0.0110014	Phf1	0.131526	Zfp81	0.771051	Pcgf2	0.128573	Atf1	0.182831	Csda	0.285924	Polrmt	0.10819	Jmy	0.992143	Taf5l	0.0249102	Pla2g6	0.0202073	Gtf2a1	0.00489334	Ankrd22	0.00957037
Hmbox1	0.286164	Zfp161	0.0537273	Nudt12	0.0080276	Tsc22d3	0.0107813	Zfp84	0.131186	Zdhhc21	0.762234	Zfp768	0.123176	Aebp2	0.182424	Mbd2	0.283751	Drg1	0.10569	Tmem131	0.992066	Arhgap17	0.0244195	Zfp81	0.0199757	Pitx3	0.00482001	Rybp	0.00937051
Hivep1	0.285617	Nr1d2	0.052462	Zfp64	0.00795713	Rfx3	0.0100364	Phf12	0.125872	Zhx1	0.759992	Drap1	0.122432	Nfic	0.178885	Mycn	0.276797	Deaf1	0.105179	Zfp81	0.991902	Ash1l	0.024139	Hif1an	0.0196271	Eid2	0.00481044	Phf14	0.0091138
Smad7	0.280572	Trerf1	0.0523975	Pias1	0.007897	Mef2a	0.00983722	Ppp1r13b	0.121231	Zkscan1	0.758598	Nfe2	0.119949	Tshz1	0.176708	Rest	0.273729	Per3	0.104366	Atf2	0.991103	Ubp1	0.0240307	Gabpb1	0.018968	Aire	0.00468421	Ankrd49	0.00744292
Stat3	0.277398	Irf7	0.052252	Papolg	0.0077	Nfatc1	0.00976993	Sin3b	0.120384	Fbxw7	0.756148	Srebf2	0.108112	Hif1an	0.165849	Rab8b	0.264545	Zdhhc6	0.103531	Sox4	0.990975	Brwd1	0.0234718	Gcdh	0.0188346	Nkx2-3	0.00460143	Ski	0.0071958
Basp1	0.27654	Ssbp2	0.051046	Anks3	0.00748724	Hcls1	0.00942838	Hmgcs1	0.119691	Atf7ip	0.754508	Smad9	0.106371	Stat3	0.162099	Yeats4	0.260435	Preb	0.103414	6720489N17Rik	0.990547	Carm1	0.0233789	Nrip1	0.0186383	Zfp238	0.00451539	Foxb2	0.00715774
Zfp281	0.276329	Nfic	0.0509965	Zfp410	0.00735569	Gzf1	0.00941328	Zfp191	0.11629	Bbx	0.752193	Anks3	0.105094	Hdac8	0.159499	Ankfy1	0.258196	Nr1d1	0.102384	Wasl	0.990527	Mga	0.0224425	Ski	0.0186171	Shprh	0.00449484	Msx1	0.00707038
Ankrd10	0.273096	Nab1	0.0503392	Max	0.00729302	Runx2	0.0093892	Zbtb48	0.114613	Ncor1	0.740824	Srf	0.103504	Nfe2l2	0.159127	Gtf2h1	0.252198	Psmc5	0.0991905	Nsd1	0.990505	Zmynd11	0.0223938	Per1	0.0185944	Sox1	0.00421439	Tal1	0.00674498
Irf3	0.272951	Zdhhc16	0.0499064	Clpb	0.0072671	Zfp36	0.00884718	Mxd1	0.1139	Hmgb3	0.730969	Nab2	0.0972673	Nfyb	0.159107	Foxp4	0.245956	Keap1	0.0982846	Zfp59	0.990454	Satb1	0.0220671	Drg1	0.0185568	Hic2	0.00415882	Hoxa7	0.00664312
4933426I21Rik	0.269626	Ankrd49	0.0482281	Prr3	0.00701712	Taf1a	0.00863812	Cxxc1	0.112744	Zfp131	0.723643	Runx3	0.0968894	Zfp295	0.156181	Nfya	0.243281	Taf6l	0.0981308	Ankrd6	0.99028	Ikzf1	0.021984	Dot1l	0.0185122	Ugp2	0.00392815	Nkx2-6	0.006295
Pdlim1	0.255907	Dedd	0.0479808	Ccnt1	0.00695437	Bbx	0.00829093	Med31	0.112265	Tial1	0.721857	Sox13	0.0938887	Srebf2	0.153007	Erf	0.239773	Zbtb17	0.097064	Otud4	0.98966	Nr2c2	0.0218377	Ehmt1	0.0182905	Ppp1r1b	0.0038711	Erf	0.00609489
Lcor	0.255372	Tbpl1	0.0476876	Smarca5	0.0069136	Rcor2	0.00801901	Huwe1	0.110827	6720489N17Rik	0.705401	Smad3	0.092396	Eed	0.150828	Dnmt3a	0.234962	Lsm4	0.0908626	Taf1	0.989575	Dido1	0.0218296	Rbm14	0.0181724	Pou4f2	0.00378432	Mxd1	0.00599768
Fos	0.254878	Arnt	0.0476149	Pcgf6	0.0066926	Wwp1	0.00799751	Sfrs5	0.107762	Zfp192	0.704242	Aip	0.0888384	Zfp410	0.147247	Hif1a	0.226779	Cdk4	0.0896872	Nfatc1	0.989388	Ing4	0.0215486	Pcgf6	0.017797	Emx1	0.00365255	Rhox6	0.00572475
AW146020	0.251715	Zdhhc1	0.0471121	Cdkn2d	0.00648849	Clock	0.0077835	Zfp407	0.107348	Pbrm1	0.690311	Mib2	0.0886931	Baz1b	0.145641	Ehmt1	0.224571	Csda	0.0850222	Smarca5	0.98872	Pbx1	0.0214659	Stat4	0.0175699	Bard1	0.00360537	Zkscan14	0.00518436
Nr2c2	0.251643	Hltf	0.0469683	Taf5	0.00647755	Zfx	0.007547	Atf7ip	0.107234	Cops2	0.690211	Rfx1	0.0868942	Dnmt3a	0.144642	Srebf2	0.223797	Ets2	0.0839142	Pbrm1	0.988068	Phf1	0.0209886	Ppp1r10	0.0173608	Fem1a	0.00351932	Smad7	0.00513591
Zkscan14	0.250789	Cnot7	0.0441183	Tcea2	0.00645311	Lmo2	0.00730605	Mpl	0.105377	Stag1	0.689632	Zfp523	0.0796645	Nr2c2	0.140218	Zfp35	0.223685	Mlx	0.0830562	Ets1	0.987962	E2f6	0.0209644	Supt3h	0.0170781	Zbtb16	0.00346965	Ppp1r1b	0.00494622
Gpkow	0.248081	Tox4	0.0439705	Nr2f6	0.00641426	Elf1	0.00694097	Zdhhc1	0.105107	Ezh2	0.684091	Scmh1	0.0783407	Orc2l	0.139944	Mta1	0.214211	Nedd8	0.0810587	Rb1	0.987903	Phf2	0.0203468	Znrd1	0.0169054	Mllt3	0.00325514	6720456H20Rik	0.00469363
Wasl	0.247402	Rfxap	0.0438083	Zfp36l1	0.00639394	Pfdn1	0.00686057	Ciao1	0.104189	AW146020	0.682066	Tle3	0.076823	Bach1	0.138025	Ubn1	0.203173	Taf12	0.0789532	Rbm39	0.987417	Ezh1	0.0201976	Nr1h2	0.0167593	Pbrm1	0.00323257	Snai1	0.00464904
Tob1	0.247102	Hmg20b	0.0437182	Zfp110	0.00637457	Rab1b	0.00685229	Pias2	0.103939	Ddx58	0.679934	Prrxl1	0.0735683	Fusip1	0.135344	Aebp2	0.202744	Ppp2r1a	0.073999	Uhrf2	0.987166	Gmeb1	0.0199697	Trps1	0.0167518	Tmpo	0.0031367	Nkx2-3	0.00462706
Nab1	0.246079	Trim30	0.043499	Taf1b	0.00637192	Satb1	0.00676533	Baz1b	0.103016	Clock	0.668901	E2f1	0.0715076	Fem1b	0.132598	Asxl1	0.197818	Med8	0.0730955	Stag1	0.987149	Orc2l	0.0198979	Thra	0.0166912	Phf2	0.00313135	Cebpz	0.00436008
Gtf2i	0.241675	Tcf12	0.0432245	Gmeb1	0.00614663	Nfic	0.0067353	Rest	0.100659	Pcgf6	0.667525	Gtf2ird1	0.0709292	Dr1	0.131373	Nab1	0.196381	Pwp1	0.0715989	Nfkbiz	0.986594	Mtfmt	0.0198268	Zswim4	0.0164999	Foxd2	0.0031011	Zfp768	0.0043051
Asb3	0.240218	Bbx	0.0421661	Cited4	0.00605426	Lbh	0.00665418	Ddit3	0.0999843	Mllt10	0.660307	Pou2f2	0.0702056	Zbtb33	0.131234	Eed	0.196199	Ankrd46	0.0702643	Bclaf1	0.985567	Zdhhc6	0.0197582	Deaf1	0.0163393	Nkx2-6	0.00296967	Zfp219	0.00403892
Nmi	0.23407	Hif1an	0.041949	Pygo2	0.00602841	Supt3h	0.00654865	L3mbtl2	0.0994252	Atf1	0.653477	Cbfb	0.0681459	Pknox1	0.130777	Ints12	0.194594	Mllt1	0.0696991	Dmtf1	0.985372	Bclaf1	0.019754	Zfp192	0.0160461	Mll5	0.00294983	Zfp524	0.00399019
Hif1an	0.229748	Hmbox1	0.0418495	Tal1	0.006017	Bach2	0.00639199	Ncoa2	0.0978355	4933426I21Rik	0.650237	Tgif1	0.0645722	Brca1	0.129347	E2f6	0.191429	Polr3h	0.0686755	Pias2	0.985181	E2f1	0.0194644	Tcea2	0.0158519	Vax1	0.00290278	Lbx1	0.00390622
Rnf14	0.229344	Gtf2h1	0.041773	Zfp263	0.00596747	Tsg101	0.00637547	Nab1	0.0976727	Atf2	0.647902	Trerf1	0.0626633	Gabpb1	0.128878	Tmpo	0.18913	Polr2h	0.0671093	Papola	0.984628	Zkscan1	0.0188484	Siah2	0.0156345	Hltf	0.00280978	Zfp451	0.00385567
Nfkb1	0.229146	Stat5a	0.0413075	Tbp	0.00595595	Nr1d2	0.00617669	Zfp113	0.0967831	Tshz1	0.640131	Lmx1b	0.0614353	Zfp142	0.127817	Tshz1	0.187265	Lass2	0.0668746	Erg	0.984567	Otud4	0.0186846	Plagl2	0.0156289	Zfp207	0.00264721	Sox1	0.00369639
Mtfmt	0.228627	Ankrd54	0.0412388	Per2	0.00591526	Lass4	0.0056477	Zmynd11	0.093532	Zeb2	0.638698	Mef2c	0.0607523	Nab1	0.124572	Cbx3	0.186989	Dmap1	0.0645811	Zfp445	0.984511	Sp1	0.0185001	Sap30	0.0154232	Stat1	0.00262247	Smad1	0.00359454
Ezh1	0.227395	Sin3b	0.0408555	Jmy	0.00586179	Atxn3	0.00555743	Foxj3	0.0897451	Huwe1	0.629829	Stat6	0.0585384	Ssbp3	0.123231	Nr2c2	0.185531	Ciao1	0.0619032	Narg1	0.984263	Zscan22	0.0184263	Dbp	0.0153911	Tcfcp2	0.00261433	BC003267	0.00332611
Zfp113	0.226026	Erg	0.0407179	Myst4	0.00581828	Pogk	0.005497	Rhox6	0.0877337	Tcf12	0.616096	Pbx1	0.0581397	Rest	0.123073	Smarce1	0.17981	Rbm14	0.0612817	Mllt10	0.984125	Zfp398	0.0182466	Polr2l	0.0150171	Atf5	0.00261032	Aatf	0.00321858
Helz	0.225338	Mxd1	0.0405696	Zfp407	0.00580253	Fusip1	0.00528398	Tox4	0.0860536	Papolg	0.616076	Ankrd46	0.0560711	Csde1	0.122993	Hif1an	0.179406	Vps72	0.0599585	Tcf12	0.983516	Foxp1	0.0179049	Ruvbl2	0.0149537	Hspb9	0.00255793	Glis1	0.0032169
Sap30bp	0.22171	E2f1	0.0404634	Zfp61	0.00569245	Arnt	0.0052552	Myb	0.0860157	Trim24	0.608213	Xbp1	0.0554393	Pwp1	0.122137	Nfkb1	0.170908	Sfpi1	0.0592688	Clock	0.983473	Pura	0.0177813	Taf11	0.0149284	Garnl1	0.00251106	Bola1	0.00308764
Dedd	0.221637	Nfkb1	0.0399073	Ski	0.0056481	Zfp148	0.00485219	Mef2a	0.0809604	Zfp39	0.600546	Pbx2	0.0551868	Cebpg	0.121683	Zfp263	0.168871	Rnps1	0.0591475	Zfx	0.983221	Atm	0.0175802	Phf23	0.0146582	Zfp41	0.00247489	Zfp113	0.00304109
Ccnc	0.220163	Zbtb20	0.0397308	Map3k12	0.00562789	Ezh1	0.00479761	Fem1c	0.0809459	Zfp191	0.587392	Zbtb3	0.0538155	Gtf3c4	0.119689	Ezh2	0.165231	Zfp64	0.0581933	Lcor	0.983185	Hhex	0.0174835	Ing2	0.0145879	Arid4a	0.00242039	Sertad2	0.00303164
Srebf2	0.219044	Gtf2e1	0.0396225	Mecp2	0.00551129	Hoxb4	0.00473262	Ing1	0.0805022	Otud4	0.585785	Hes7	0.0456709	Zfp281	0.118989	Phf8	0.164576	Plrg1	0.0575553	Papolg	0.980693	Ccnh	0.0174151	Hmg20a	0.0144686	Rb1	0.0024162	Sox3	0.0029857
Zfp292	0.216683	Taf1	0.0391957	Mapk8	0.00541526	Asb3	0.00456234	Ankrd10	0.0789157	Elk4	0.573728	Tcfeb	0.0448749	Fem1c	0.11753	Baz1b	0.164117	Mafg	0.0572071	Cdc5l	0.980021	Scmh1	0.0173305	Ssbp3	0.014306	Zfp810	0.00240921	Tcf7	0.00291874
Elk3	0.214266	Ppp1r12c	0.0390218	Hif1an	0.00536262	Dedd	0.00442417	Zfp277	0.0772801	Ep300	0.571036	Emx1	0.0431762	Supt3h	0.117311	Ppp3cb	0.162484	Mapk3	0.0556431	Huwe1	0.97774	Etv6	0.0170102	Tshz1	0.014202	Nr3c1	0.00233708	Hmg20a	0.00289874
Ddx58	0.205281	Phf8	0.0385217	Ugp2	0.00536019	Msrb2	0.00433691	Zbtb16	0.0768927	Pou2f1	0.565542	Sirt5	0.04291	Elf2	0.115357	Smad3	0.161558	Lass4	0.0521773	Hmg20a	0.977716	Zfp161	0.0169996	Max	0.0139725	Rybp	0.00233417	Lmx1b	0.00287175
Zfp426	0.2047	Sirt3	0.0382677	Nfe2l2	0.00534853	Tle4	0.00425306	Mafk	0.0755633	Zfp566	0.561482	Zfp275	0.0418555	Gmeb2	0.114817	Zfp191	0.158343	Polr2i	0.0517792	Suz12	0.977613	Zbtb1	0.0167758	Hdac8	0.0138767	Foxb2	0.00233321	Cdx1	0.00285395
Tle4	0.204255	Runx2	0.0382117	Hmg20b	0.00533332	Gtf2b	0.00418139	Nkx2-5	0.0733973	Fem1c	0.560148	Mllt1	0.04046	Hdac2	0.114662	Gtf2f2	0.15519	Asb8	0.0514053	Grlf1	0.976702	Hmgcs1	0.0166984	Zfp553	0.0138426	Egr4	0.0022852	Polr3h	0.00283651
Arid4a	0.201032	Hivep1	0.0379564	Hivep1	0.00528845	Tcf19	0.00415689	Maml1	0.0719604	Zmynd11	0.55529	Supt3h	0.0388903	Nfya	0.113274	Mta2	0.150803	Lmo2	0.0507656	Trim24	0.976222	Atf2	0.0166301	Fem1c	0.0136103	Lbx1	0.00227744	Zscan2	0.00270553
Krr1	0.191109	Garnl1	0.037766	6720489N17Rik	0.00527822	Zfp606	0.00370158	Adnp	0.0712742	Ncoa1	0.550921	Invs	0.0374844	Rab11a	0.112926	Zeb2	0.14871	Nr1h2	0.0505951	Nr3c1	0.97571	Zfp191	0.0165861	Nr2c1	0.0133356	Mef2c	0.00226773	Homez	0.00247646
Ssbp2	0.189733	Bcor	0.0374393	Rfx5	0.00517138	Per3	0.00366673	Rnps1	0.0686194	Zfx	0.536868	Bcorl1	0.0373972	Ahctf1	0.112629	Zcchc8	0.148632	Aip	0.0503716	Ezh1	0.975542	Hira	0.0165835	Pbx4	0.0130981	Sox3	0.00223505	Foxe3	0.00246143
Bach1	0.189286	Cebpz	0.0374273	Emx1	0.00516033	Zfp52	0.00366566	Zfp192	0.0683492	Nfe2l2	0.527067	Nfkb2	0.0364932	Cdk7	0.110383	Arnt	0.147973	Srf	0.0491111	Ncoa1	0.975331	Irf2	0.0165765	Ercc3	0.0129681	Zfp689	0.00223028	Tada3l	0.00239321
Zswim4	0.186966	Rab18	0.0372877	Nrf1	0.00514798	Erf	0.00361904	Ncor1	0.0675657	Carf	0.525953	Rassf7	0.0364839	Gmcl1	0.10883	Ash2l	0.147445	Ell	0.0473431	Mtf2	0.975208	Eed	0.0164843	Smad7	0.0129072	Brca1	0.00222864	Prr3	0.00238571
Hbp1	0.186458	Trip6	0.036994	Hsf2	0.0051412	Klf10	0.00360918	Myc	0.0671436	Ing2	0.515053	Zkscan14	0.0359098	Zhx1	0.10735	Gtf2a1	0.147401	Trip13	0.0472106	Arid1a	0.972489	Ccnt2	0.0163394	Hsbp1	0.0127334	Nkx2-4	0.00222499	Lhx6	0.00236714
Smad4	0.180075	Klf16	0.0368588	Scmh1	0.00504461	Nr2c1	0.00355709	Rnf38	0.0664107	Brca1	0.509564	Rhox6	0.0347884	Notch2	0.105171	Sfpi1	0.143612	Klf16	0.046382	Ankhd1	0.972058	Rel	0.0162987	Zfp295	0.0126006	Basp1	0.00215019	Sry	0.0023656
Fmnl2	0.17953	Rb1	0.0364956	Per1	0.00501862	Trim30	0.00355153	Phf21a	0.0657678	Gabpa	0.501695	Cbx8	0.0343894	Ppp3cb	0.103997	6720456H20Rik	0.143046	Zfp219	0.0458589	Zfp36l1	0.96948	Narg1	0.015958	Xab2	0.0124707	Rfc1	0.00211875	Nr1d2	0.00228423
Zbtb33	0.174396	Pou2f1	0.0362076	Zfp426	0.00489609	Rsrc1	0.00350193	Hmg20a	0.0653406	Rfc1	0.495155	Ascl1	0.034239	Basp1	0.0983347	Snapc4	0.141753	Pfdn1	0.0420698	Klf6	0.968357	Klf3	0.0158979	Ecd	0.0122714	Taf4a	0.00197134	Rnf141	0.00219791
Nfkbie	0.1731	Mapk8	0.0354103	Ppp1r10	0.00488976	Zfp292	0.00346117	Gtf3c1	0.0653341	Zbtb33	0.495138	Elk1	0.0341045	Spen	0.0975572	Pbx4	0.138158	Sra1	0.0403798	Stat1	0.96784	Baz2a	0.0158961	Bcor	0.0121171	Dmrt3	0.00194074	Zfp128	0.00218689
Irf5	0.172429	Mtfmt	0.0353409	Snapc2	0.00473704	Polr2h	0.00339316	Spen	0.0649734	Gfi1b	0.486608	Abtb1	0.0335968	Gabpa	0.0959818	Pias1	0.137508	Pdcd7	0.0396179	Pdcd11	0.967402	Zmym2	0.0158793	Cnbp	0.0119714	Arx	0.00193999	Nkx6-3	0.00218317
Sirt3	0.171731	Mef2a	0.0348032	Tle2	0.00473472	Zfp275	0.00325983	Ncoa3	0.064167	Tfam	0.483631	Pitx3	0.032884	Hbp1	0.0842387	Zfp207	0.134715	Gtf2ird1	0.0393964	Dek	0.967183	L3mbtl2	0.0158221	Zscan21	0.0118577	Hand1	0.00190029	Zfp202	0.00202085
Rnps1	0.170878	Mapk3	0.0347225	Dot1l	0.00470909	Gtf2a1	0.00320518	Nsd1	0.063864	Ankib1	0.466195	Phf1	0.0322394	Polr3b	0.0794433	Chd4	0.134528	Ighmbp2	0.0371809	Nfatc3	0.967037	Myc	0.015794	Gtf3c4	0.01173	Ncoa6	0.00186582	Emx1	0.00189595
Nfkb2	0.169494	Stat5b	0.034554	Hdgfrp2	0.00470127	Atoh1	0.00314628	Pias1	0.0637496	Taf7	0.462576	Mapk3	0.0321006	Zfp238	0.0783819	Ahctf1	0.134416	Sirt2	0.0369163	Zfp39	0.966927	Sirt3	0.0157167	Hira	0.0116663	Zfp606	0.00185892	Zfp59	0.00188716
Yaf2	0.168616	Ankrd10	0.0343829	Pbx2	0.00469751	Zfp161	0.00298902	Rfxank	0.0627275	Tcf20	0.453614	Zfp128	0.031174	Sirt1	0.0774406	Tbp	0.133309	Ercc3	0.0357193	Ubp1	0.962343	Basp1	0.0153776	Nfkbiz	0.011367	Lhx6	0.00184023	Zbtb20	0.00184501
Mxd1	0.166226	Pygo2	0.034111	E2f2	0.0046705	Rnf141	0.00294033	Drg1	0.0617978	Lcor	0.445292	Prdm16	0.0308224	Arnt	0.075285	Zfp281	0.132545	Lass5	0.034721	Arid5b	0.961542	Zeb2	0.0153649	Tsg101	0.0112002	Cdx1	0.0018313	Hand1	0.00183197
Crebzf	0.165269	Ruvbl2	0.0338345	Rfxank	0.00465902	Ppp5c	0.00285966	Mcm2	0.0615969	Nfatc3	0.44175	Zbtb48	0.0299477	Tob1	0.0732716	Ski	0.124829	E2f4	0.034654	Ctcf	0.959598	Bach2	0.0153389	Rbpj	0.0105088	Papolg	0.00174271	Zfp637	0.00177471
Purb	0.162132	Brwd1	0.0333217	E2f3	0.00464358	Btf3	0.00271076	Mxd4	0.0612041	Zdhhc15	0.436226	Rxrb	0.0293194	Phf10	0.0728694	Polr2a	0.124369	Srebf1	0.0341264	Foxj3	0.958705	Zbtb22	0.0153348	Cdc5l	0.0103992	Mxi1	0.00156614	Arx	0.00168982
Ankrd46	0.161246	Pwp1	0.0331269	Whsc2	0.00464135	Smad7	0.00268389	Dnmt3a	0.0611375	Polr3f	0.433897	Tnfaip3	0.029238	Deaf1	0.0722775	Gabpa	0.119279	Usf1	0.0334415	Sin3a	0.958339	Gpkow	0.0151206	Clpb	0.0100058	Foxp1	0.00154997	Zfp235	0.0016598
Ikzf2	0.161171	Pias4	0.0330829	Brwd1	0.00455004	Lass5	0.00242788	Hmbox1	0.0598904	Tob1	0.432366	Evx2	0.0286965	Ezh2	0.0714452	Rnf14	0.118088	Hmg20b	0.0322907	Zfp407	0.95763	Scand1	0.0150551	Rfx3	0.00994186	Hmx2	0.00154719	Rsrc1	0.0015965
Sirt6	0.157348	Nfkbib	0.0327002	Klf13	0.00446983	Nfkb1	0.00229984	Phf8	0.0580544	Htatsf1	0.428761	Glis1	0.0281953	Ccnh	0.0690518	Cebpg	0.117434	Ring1	0.0322554	Zfp113	0.957381	Ing1	0.0147352	E2f6	0.0098785	Ivns1abp	0.00147719	Zfp191	0.00154974
Trim30	0.157292	Gtf2h2	0.0322582	Gtf2f2	0.00440968	Ahr	0.00221742	Taf3	0.0577774	Cnot7	0.427525	Lin28	0.027875	Atf7ip	0.0685073	Zdhhc13	0.115684	Zfpm1	0.0316539	Zfp748	0.951092	Gtf2e1	0.0146204	Hmgcs1	0.00985424	Polr3e	0.00147537	6720489N17Rik	0.00152084
Ssbp3	0.157049	Taf1b	0.0322434	Tbpl1	0.00435478	Rnf14	0.00217562	Zbtb3	0.0564203	Tmpo	0.423452	Hhex	0.0269065	Ddx20	0.0682158	Phf10	0.114631	Sirt7	0.0301046	Zfp68	0.950562	Wwp1	0.0144609	Trp53bp1	0.00972242	Mapk3	0.0014429	Otp	0.00151469
Psmc5	0.156099	L3mbtl2	0.0321264	Patz1	0.00434417	Ruvbl2	0.00216856	Ubn1	0.0564012	Shank3	0.416217	Pbxip1	0.0260071	Ikbkg	0.0671664	Zbtb33	0.112377	Bcorl1	0.0287542	Zkscan1	0.945782	Hmbox1	0.0141883	Mib2	0.00965218	Vgll2	0.00139042	Zfp90	0.00146408
Arid5b	0.155825	6720489N17Rik	0.0320187	Barx1	0.00432915	Zfp192	0.00214795	Phf14	0.0558031	Baz1b	0.41252	Per3	0.025695	Gtf2a1	0.0662586	Zhx1	0.110221	Tceb2	0.027806	Pbx1	0.944356	Pml	0.0141284	Supt7l	0.00963942	Zscan22	0.00135438	Tgif2	0.00142196
Rest	0.155594	Pias2	0.0318467	Zfp109	0.00432643	Trerf1	0.00211239	Smad2	0.0557375	Nkrf	0.405514	Zfp282	0.0252241	Lass5	0.0660063	Fem1c	0.107502	Rab8a	0.0275824	Zfp90	0.941438	Tcf19	0.01404	Plrg1	0.00956541	Hoxa7	0.00134547	Pura	0.00135881
Atf7	0.151554	Smarca5	0.0315814	Rab11a	0.00431947	Tle3	0.00210221	Elk4	0.0552281	Gtf2h2	0.397097	Hoxb1	0.0249658	Nfix	0.0658135	Spen	0.106203	Mpl	0.0273396	Foxo1	0.941422	Trps1	0.0140314	Tcf7	0.00954178	Rsrc1	0.00131469	Hspb9	0.00133597
Ikbkb	0.149932	Zfp68	0.0315633	Zdhhc13	0.00431801	Elk3	0.00207645	Zfp161	0.0548211	Zfp113	0.395864	Ube2w	0.0238047	Pias1	0.0647636	Thrap3	0.105974	Tada3l	0.0272299	Irf1	0.937974	Gtf2a1	0.0138125	Rxrb	0.00954149	Dmrta2	0.0012801	Zfp182	0.00133225
Rela	0.14983	Cited2	0.0313517	Ankib1	0.0042345	Zfp810	0.00205761	Ski	0.0546824	Crebzf	0.395023	Nkx2-5	0.0236566	Cbx7	0.0647157	Tle4	0.105276	Ppargc1b	0.0271014	Smad4	0.937045	Cited2	0.0136166	Etv3	0.00948832	Nkx6-3	0.00127026	Foxl2	0.00133157
Ccnt1	0.149664	Polr3b	0.0313082	Invs	0.00422562	Pdcd11	0.00197878	Per1	0.053347	Ccnt1	0.389367	Hoxa4	0.0234402	Strap	0.0637519	Ncoa3	0.104731	Gtf2f2	0.0270983	Nr1d2	0.93556	Zfp407	0.0134974	Taf5l	0.0094751	Pura	0.00124207	Ddx54	0.00132047
Dmtf1	0.146196	Bmi1	0.0310526	Hltf	0.00419986	Sfpi1	0.00189529	Srebf1	0.0528835	Stat1	0.371176	Tbx1	0.0220629	Pura	0.0622073	Runx1	0.10254	Fev	0.0258746	Tcf20	0.934341	Thrap3	0.0134806	Lass4	0.00947454	Tial1	0.00121952	Irf1	0.00128261
Polr3b	0.146109	Tbp	0.030856	Sin3b	0.00417562	Ifnar2	0.00184292	Ing3	0.0527037	Eed	0.367348	Tef	0.0220169	Sin3b	0.0618772	Zfp592	0.100965	Zbtb3	0.0256876	Tial1	0.933301	Tceb3	0.01347	Bpnt1	0.00946469	Lhx4	0.00117521	Cbx8	0.00123463
Zmym2	0.145662	Gtf2i	0.0308409	Pou2f1	0.00416129	Ttrap	0.00174405	Zkscan3	0.0507544	Rbl1	0.361389	Nr1d1	0.0216473	Khdrbs1	0.0613331	Dpf2	0.0945212	Sqstm1	0.0253367	Trp53bp1	0.931717	1810007M14Rik	0.0132812	Pfdn1	0.00934476	Lmx1b	0.00116472	Irf7	0.0012266
Maged1	0.143989	Atf2	0.030764	Gtf2e1	0.00415414	Yy1	0.00166753	Supt7l	0.0502267	Nab1	0.357244	Osgin1	0.0214332	Sirt3	0.0608924	Polr2b	0.0935649	Ostf1	0.024657	Zdhhc15	0.929769	Nfyb	0.0128929	Ikbkb	0.00933756	Hes5	0.00112162	Tada2l	0.00121104
Atf6	0.135105	Zfp192	0.0303658	Dcp1a	0.00408561	Hhex	0.00161291	Klf10	0.0497397	Foxn2	0.349014	Hmg20b	0.0209245	Adnp	0.0595041	Sirt1	0.0911917	Trim28	0.0234546	Atf7ip	0.927475	Dmtf1	0.0128506	Ankrd10	0.00915944	Ankrd49	0.00109125	Sap30bp	0.00116273
Tcf4	0.133372	E2f6	0.0303372	5830417I10Rik	0.00407266	Cbx8	0.00159871	Cnot7	0.0494684	Zfp637	0.339779	Ddx54	0.0204385	Cnot8	0.0587379	Zdhhc5	0.0905069	Gtf2h4	0.0231924	Adnp	0.924695	Sirt2	0.0127984	Ighmbp2	0.00914774	Rarg	0.00108264	Pcgf6	0.00115723
Trp53bp1	0.131394	Ankra2	0.0299307	Otp	0.0040685	Phf1	0.00158919	Tcfe3	0.0493458	Mcm8	0.334262	Spdef	0.0204105	Sfrs5	0.057465	Ldb1	0.0902134	Zfp647	0.0230888	Rbl1	0.924382	Bach1	0.012461	Tbpl1	0.00910201	Otp	0.00108178	Ash2l	0.00115468
Hexim1	0.131169	Runx3	0.0297322	Atf6	0.00400507	Ankrd54	0.00157258	Ercc3	0.0487939	Blzf1	0.32021	Ifnar2	0.0197042	Mtpn	0.0572158	Nfe2l1	0.0868679	Zbtb22	0.0224504	Rnf38	0.922218	Lbh	0.0124509	Gtf2f2	0.00898171	Hes7	0.00107768	Klf3	0.00114661
Tcf12	0.129258	Zfx	0.0295626	Zdhhc5	0.00398028	Arid4a	0.0015629	Abt1	0.0479001	Zfp189	0.319823	Ehmt2	0.0189912	Ing4	0.0565676	Mtpn	0.086135	Sirt6	0.0216589	Hipk2	0.921208	Anks3	0.0124313	Stat5a	0.00889395	Stat2	0.00105034	Ikbkb	0.00114592
Csde1	0.127694	Gtf2a1	0.0295186	Nkx2-5	0.00393431	Tada2l	0.00155115	Sin3a	0.0473344	Wasl	0.319256	Sp2	0.018942	Foxn2	0.0558163	Rbl1	0.0851642	Tbp	0.0202823	Elk3	0.919224	Tcf7l2	0.0123448	Smad3	0.00828099	Foxl2	0.00103423	Foxj2	0.00112784
Taf1a	0.124143	Tal1	0.0291981	Ints12	0.00391877	Htatsf1	0.0015083	Nfatc1	0.0469417	6720456H20Rik	0.319073	Ncor2	0.0186607	Sirt2	0.0549413	Hivep1	0.0833924	Cops5	0.0201951	Zfp131	0.918113	Atf7	0.0122192	Sin3b	0.00819286	Zfp292	0.00102845	Dmrta2	0.00108596
Papolg	0.123319	Zdhhc5	0.0285628	Tox4	0.00391648	Mtfmt	0.00146392	Scmh1	0.0467785	Ncoa6	0.301367	Dmrt3	0.0185685	Ints12	0.0548868	Rbpj	0.0831843	Zkscan6	0.0197221	Runx3	0.916747	Ncor1	0.0122041	Phf21a	0.00816633	Med8	0.000968657	Nab2	0.00107911
Abtb1	0.122181	Yeats4	0.0284827	Nab1	0.00389435	Mapk3	0.00146298	Med12	0.0460236	Zfp143	0.295554	Nkx2-6	0.0184575	Rbbp7	0.0541953	Zfp238	0.0831816	Tada2l	0.0195916	Rara	0.916575	Stat2	0.0120501	Gtf2h4	0.0081141	Smarca2	0.000962222	Brwd1	0.00107253
Mib2	0.121319	Aatf	0.0284633	Zfp661	0.00386843	Ppp1r12c	0.00143939	Pou2f1	0.0444875	Rab8b	0.281364	Egr4	0.017638	Zdhhc13	0.0528396	Rbbp7	0.0819016	Cdk9	0.0195805	Klf7	0.913907	Zfp143	0.0119018	Rab1b	0.00797474	Cited4	0.000950639	Creb3	0.00107069
Zfp398	0.120758	Klf10	0.0281675	Ing2	0.00385295	E2f6	0.00143281	Mtf2	0.0442331	Zkscan3	0.280651	Fev	0.0171805	Irf7	0.0525636	Safb	0.0812961	Supt3h	0.0190378	Carf	0.910799	Rnf141	0.0118213	Snapc2	0.00761929	Sp4	0.000940972	Gtf2ird1	0.00104375
Zfp407	0.120728	Hcls1	0.0276705	Ikbkg	0.00385064	Ncor2	0.00141478	Mllt10	0.0442279	Sp1	0.276571	Sap30bp	0.0163648	Trp53bp1	0.0525041	Tsg101	0.0808063	Sap18	0.0185787	Atf6	0.904189	Myb	0.0115833	Ankrd54	0.00756627	Hoxb1	0.000907321	Insm1	0.00104122
Foxp1	0.120413	Plagl2	0.0275455	Zbtb1	0.00384566	Nfkbil1	0.00138114	Gmeb2	0.0440058	Dido1	0.266608	Cecr6	0.0162689	Tbp	0.0508103	Mid1	0.0771982	Sap30bp	0.018568	Etv6	0.901461	Mll3	0.0115773	Ankrd32	0.00733132	Hipk2	0.000906372	Phf1	0.00103794
Irf7	0.120222	Zfp110	0.0272349	Cdkn2c	0.0037667	Taf6	0.00127762	Asb1	0.0437988	Nfyb	0.259428	Ell	0.0157634	Rbl1	0.050121	Atf7ip	0.0771316	Rfx1	0.018274	Hivep1	0.900938	Hdac5	0.0113021	Ahr	0.00727243	Creb1	0.000844896	Nkx2-4	0.00101479
Nfe2l1	0.119456	Irf2	0.0272044	Polr2a	0.00375265	Keap1	0.00127736	Mll1	0.0436034	Tardbp	0.256085	Tead3	0.0155613	Thrap3	0.0496428	Adnp	0.0770021	Rps6ka4	0.0176561	Irf7	0.896602	Ankhd1	0.0110158	Zfp191	0.00719326	Rbl1	0.000806728	Polr2k	0.00101374
Nfix	0.118664	Hsbp1	0.0271448	Fosl2	0.00364738	Arhgap17	0.00126661	Pura	0.0434046	Taf12	0.247933	Mnt	0.015314	Nrf1	0.0458138	Ctnnb1	0.07664	Snrpb	0.0171976	Sp1	0.8934	Rb1	0.0110145	Mafk	0.0071439	Mll3	0.000802608	Htatip2	0.000983943
Gtf2h3	0.117388	Wwp1	0.0271362	Dbp	0.00364481	Foxj2	0.00126619	Zfp189	0.0427706	Ttrap	0.242488	Ski	0.0146909	Mki67ip	0.045492	Zfp142	0.0758879	Rabl3	0.0170028	Tcerg1	0.885547	Ssrp1	0.0110108	Mnat1	0.00704526	Rps6ka4	0.000783697	Pitx3	0.000978758
Tox4	0.117295	Btf3	0.027009	Orc2l	0.0036338	Rybp	0.00125805	Ppp5c	0.0421164	Fusip1	0.240861	Clip2	0.0146767	Nfx1	0.0449983	Tle3	0.0749855	Ankrd52	0.0167452	Ncoa3	0.88488	Trim24	0.0110099	Stat3	0.00699836	Nsbp1	0.000776902	Hmgcs1	0.000973888
Zdhhc5	0.11624	Helz	0.0268294	Ikzf2	0.00362698	Cbx7	0.00125594	Prr3	0.0419616	Ank1	0.239852	1300018I17Rik	0.014644	Mxd4	0.0446581	Ubtf	0.0722508	Carm1	0.0166915	Sirt1	0.881033	Nfkbil1	0.0109722	Zbtb7a	0.00697903	Lmo4	0.000766743	Sertad1	0.000965338
Pias1	0.116146	Gabpa	0.0266142	Dmrt3	0.00362597	Crebzf	0.00121522	Helz	0.0415429	Mynn	0.236803	Zfp202	0.0145942	Tle4	0.0444538	Psmd10	0.07108	Esrra	0.0161847	Sertad2	0.875952	Mll1	0.010934	Lass2	0.00695153	Zkscan3	0.000742728	E2f6	0.000945709
Zkscan1	0.114744	Myst4	0.0265309	Mnat1	0.00362455	Etv3	0.0012139	Safb2	0.0415002	Ikzf2	0.235689	Klf2	0.0142174	Ankrd46	0.0437793	Fli1	0.0686437	Zbtb48	0.0159637	Zkscan3	0.87242	Glis2	0.0108831	Ell	0.00683305	Ash1l	0.000698528	Zbtb3	0.000933082
Zfp445	0.110238	Pqbp1	0.0264205	Runx3	0.00356667	Cbx4	0.00117423	5830417I10Rik	0.0411828	Jun	0.232378	Sox18	0.0140083	Nfkb1	0.0436575	Tcfap4	0.068326	Homez	0.015726	Hhex	0.870095	Trp53bp1	0.0107099	Gmeb2	0.00676535	Snai1	0.000668198	Mnat1	0.000927331
Sirt1	0.109853	Ankib1	0.0263119	AW146020	0.00353449	Ercc3	0.00108578	Ankfy1	0.0411424	Trip4	0.230639	Hmx3	0.0135187	Rnf141	0.0432766	Zfp161	0.0670376	Drap1	0.0156702	Zeb2	0.869658	Mkl1	0.0106718	Rfxap	0.00671934	Pbx2	0.000637144	Hmx2	0.000927145
Pml	0.108616	Gmcl1	0.0262626	Ecd	0.00351979	Cbx2	0.00108452	Elf2	0.0404618	Foxo1	0.218158	Pawr	0.0130902	Zkscan3	0.0431223	Ncoa5	0.0664036	Zfp768	0.015491	Arhgap17	0.864802	Zdhhc16	0.0106135	Cnot8	0.006649	Zdhhc13	0.0006324	Cited4	0.000915153
Zbtb43	0.108011	Zmym2	0.0259726	Gmeb2	0.00350156	Gtf2h1	0.00106664	Atf6	0.0404321	Zfp407	0.216066	Dnmt3a	0.0128919	Ncoa3	0.0427975	Etv6	0.0663914	Tcfe3	0.0151918	Hmbox1	0.864534	Hes6	0.010563	Gmcl1	0.00663805	Zfp688	0.000626065	Pou2f2	0.000906397
Dnmt3a	0.107704	Ikbkb	0.0258516	Psmd10	0.00347458	Nab2	0.00104701	Psmc5	0.0402953	Ubp1	0.215579	Wt1	0.0128635	Safb2	0.0416482	Hdac3	0.066339	Mbd3	0.0148015	Ahctf1	0.863613	Sirt6	0.010531	Zfp84	0.00662018	Sp3	0.000622009	Spdef	0.000901886
Hdac3	0.105945	Ncoa6	0.0257767	Sp2	0.00344823	Zdhhc15	0.00104107	Ankib1	0.0396237	Myst4	0.214968	Usf2	0.0127502	Mapk1	0.0414752	Zfp219	0.0652347	Creb3	0.014629	Stat4	0.861244	Ncor2	0.010462	Zfp593	0.00659564	Zfp189	0.000619747	Zfp275	0.000897638
Nr1h2	0.105339	Rest	0.0254748	Pms1	0.00344541	Zscan2	0.00103727	Ehmt1	0.0392524	Hivep1	0.211966	Zfp647	0.0124973	Zcchc8	0.041301	Max	0.0639973	Snip1	0.0142775	Helz	0.84905	Rfxank	0.0104572	Whsc2	0.00636287	Sry	0.00060762	Nkx6-2	0.000892291
Erg	0.104011	Keap1	0.0252236	Pknox1	0.00342909	Sirt5	0.00102278	Dedd	0.0392504	Bard1	0.197272	Dlx3	0.0122059	Zfp207	0.0406785	Deaf1	0.0639902	Bcl3	0.0142117	Brd8	0.845161	Whsc2	0.010339	Pwp1	0.00633411	Adnp	0.000603991	Hoxb1	0.00089126
Ercc3	0.100206	Sertad2	0.0252206	Carf	0.00336882	Pias2	0.000995703	Zfx	0.0391086	Psmd10	0.196657	Hmgn2	0.0120158	Smarce1	0.0401515	Hmbox1	0.0639803	Zfp35	0.0139195	Cebpg	0.844565	Dedd	0.0102562	Rnps1	0.00621298	Smarca4	0.000591804	Pias2	0.000888496
Xab2	0.0986071	Mkl1	0.0246829	Cdk7	0.00336209	Zkscan3	0.000990598	Tada3l	0.0388975	Cbx3	0.193071	Dpf2	0.0116974	Mcm4	0.0396165	Helz	0.0621427	Limd1	0.0135886	Pogk	0.837529	Runx2	0.0100773	Pqbp1	0.00605573	Irf2	0.00058942	Vgll2	0.00088153
Hdac10	0.0982118	Foxj3	0.0245617	Stat5b	0.00331191	Mcm8	0.000943024	Deaf1	0.0377559	Phf10	0.18832	Nfkbil1	0.0115512	Hsbp1	0.0388394	Pbx2	0.0612988	Irf3	0.013359	Runx1	0.832671	Fusip1	0.00995142	Zfp263	0.00596224	Mybl2	0.000587531	Ppp1r13b	0.000841566
Sin3b	0.0969633	Pbx2	0.0244646	Phtf1	0.00329033	Nr1h2	0.000904716	Nfkb1	0.0368883	Foxj3	0.183417	Zfp219	0.0115138	Zfp36	0.0384103	Pbx1	0.0605782	Hdgfrp2	0.0120783	Zfp281	0.825181	Nsd1	0.00992528	Rest	0.00595135	Ikzf1	0.000582037	Mib2	0.000828781
Pbxip1	0.096941	Zfp410	0.0241157	Hoxb3	0.00327959	Rest	0.000903564	Whsc2	0.0367015	Ankra2	0.182117	Nkx2-4	0.0113542	Tcf20	0.0382091	Dnmt1	0.0603822	Mcm3	0.0115079	Nab1	0.823478	Nab1	0.00980424	Tysnd1	0.00592829	Id2	0.000556673	Pawr	0.00081864
Gtf2a1	0.0948561	Zfp281	0.0238944	Ncoa6	0.00326765	Zfp59	0.000884063	Gpkow	0.0365579	Safb	0.171171	Foxm1	0.0113502	Hmgb3	0.0379413	Ttrap	0.0597905	Med31	0.0112	Zhx1	0.803586	Sin3a	0.0095975	Preb	0.00586295	Glis1	0.000537517	Nfkbiz	0.000808547
Ccnk	0.0946417	Smad2	0.0238881	Foxo1	0.00321164	Smad1	0.0008681	Erg	0.0365538	Klf10	0.168449	Insm1	0.0111281	Smad4	0.0374171	Lass5	0.0596818	Rab18	0.0109049	Pms1	0.799294	Pbrm1	0.00959053	Cdk7	0.00577993	Nkx6-2	0.000535195	Atf5	0.000808372
Hdac5	0.0927371	Ewsr1	0.0238706	Zfp39	0.00317566	Helz	0.000848737	Ezh2	0.0362925	Nr1d2	0.165992	Zfp13	0.0111123	Ncoa5	0.0371445	Zbtb7a	0.0595437	Snapc2	0.0103628	Taf4a	0.797642	Mlx	0.00948939	Sertad1	0.00567654	Phf10	0.00053178	Zfp688	0.000797449
Supt3h	0.0912577	Ccnh	0.0237135	Hand1	0.00315713	Tgif1	0.000815398	Tmpo	0.0361337	Hdac2	0.160861	Hes6	0.011029	Tcerg1	0.0370496	Thra	0.0582987	Asb6	0.0102284	Foxj2	0.797482	Myst4	0.00946959	Cebpb	0.00566303	Hdac5	0.000483078	Dedd2	0.000784318
Zfx	0.0905558	Cxxc1	0.0236366	Bola1	0.00314121	Hif1a	0.000811615	Atf2	0.0345886	Zfp109	0.157988	Barx1	0.0109359	Psmd10	0.0370272	Tox4	0.057557	Erf	0.010122	Gtf2a1	0.787465	Bbx	0.00945742	Taf1a	0.00560109	Insm1	0.000476719	Hes7	0.000770118
Ncoa6	0.088492	Zfp109	0.0234318	Phf23	0.0031298	Zfp90	0.000805197	Zhx1	0.0345597	Ankrd49	0.156093	Vax2	0.0108725	Cdk2	0.036817	Zfp398	0.0562554	Bola1	0.0100184	Gabpa	0.78001	Mapk8	0.00937354	Trip13	0.00559329	Zfp13	0.000474474	Snapc4	0.00076036
Stat5a	0.087815	Lmo4	0.0234008	Zfp35	0.00312771	Trib3	0.000791433	Zfp386	0.0341959	Tcea1	0.154833	Zfp689	0.0105211	Zfp68	0.0366985	Hmgb2	0.056096	Asb1	0.0100123	Hmga2	0.777295	Zfp238	0.00929563	Nfkb2	0.00557037	Zfp647	0.000456499	Pbx1	0.000756764
Jun	0.0868944	Rab11b	0.023382	Srf	0.00310961	Crebbp	0.000787722	Pknox1	0.0341936	Zdhhc13	0.153855	Eid2	0.0104067	Smad3	0.0363275	Trp53bp1	0.0546743	Zfp523	0.00998179	Mapk8	0.769937	Gtf2h1	0.00918332	Ilf3	0.00545578	Zfp143	0.000430752	Polr2f	0.000727656
Zfp410	0.0857959	Nfe2l2	0.0233469	BC003267	0.00308735	Phf14	0.000767824	Polr3e	0.0340344	C1d	0.152482	Ighmbp2	0.0102139	Stat2	0.0359499	5830417I10Rik	0.0546295	Ube2w	0.00965915	Nr2c2	0.748364	Zfp282	0.0091291	Sqstm1	0.00545069	Zfp661	0.000426856	Gtf2h4	0.00072118
Ncor2	0.0844794	Pcgf6	0.0232268	Zfp143	0.00307255	Zmym2	0.000759156	Zfp35	0.0339921	Trim30	0.149656	Ezh1	0.0100478	Mib2	0.0350882	Arhgap17	0.0545975	Snapc4	0.00953475	Cnot7	0.74034	Rnf38	0.009117	Prr3	0.00544205	Htatip2	0.000422567	Zfp386	0.000715493
Stat2	0.0842587	Zfp295	0.0231969	Bmi1	0.00306257	Smad4	0.000753143	Rbl1	0.0338984	Taf3	0.148175	Ruvbl2	0.00991456	Hivep1	0.035081	Plagl2	0.0532387	Fem1a	0.00941014	Zfp52	0.716611	Stat5b	0.00903904	Pdlim1	0.00541925	Sp1	0.000418501	Arid4a	0.000666817
Gfi1	0.0825078	Orc2l	0.0230306	Lcor	0.00304828	Etv6	0.000750125	Nfic	0.0338237	Sertad2	0.144854	Ppp1r12c	0.00975393	Gtf2b	0.0336445	Hmgb3	0.0529778	Taf6	0.00929314	Ankib1	0.713114	Zfp219	0.00903229	Polr3d	0.00530319	Mecp2	0.000417269	Rbpj	0.000642946
Foxj3	0.0819823	Fem1c	0.022974	Esrra	0.00304606	Rbak	0.000722786	Taf1b	0.0337239	Pias2	0.142775	Brpf1	0.00975091	Yy1	0.033409	Cic	0.0526492	Gmeb2	0.00927718	Aebp2	0.712869	5830417I10Rik	0.0090032	Runx1	0.00528194	Hoxa4	0.000392594	Zfp593	0.000631194
Mynn	0.0818312	Ezh1	0.0228844	Taf6l	0.00300612	Pbx4	0.000721835	Csde1	0.033689	Csde1	0.142389	Esrra	0.00955137	Safb	0.0325289	Klf13	0.0522199	Abtb1	0.00875232	Hoxa9	0.697034	Aes	0.00900027	Ccnt2	0.00520967	Tulp4	0.000389943	Lhx4	0.000616581
Htatsf1	0.0814271	Rel	0.0228125	Zfp524	0.0029925	Gtf2i	0.000716946	Nfatc3	0.0332595	Adnp	0.142137	Pitx1	0.00953238	Etv6	0.0318589	Zfp36	0.0521927	Hdac5	0.00864931	Ddx54	0.695219	Zfp445	0.00896812	Sirt6	0.00520786	Atf7ip	0.000384128	Cited1	0.000608146
