# Supplementary material for: Discovering sparse transcription factor codes for cell states and state transitions during development
Source: eLife. 2017 Mar 15;6:e20488. doi: 10.7554/eLife.20488 (PMC5352226; doi:10.7554/eLife.20488)
Supplement: Figure 4—source data 1. — Cells were assigned to a cluster based on an iterative clustering procedure. Their final cluster assignments are shown here. Cell types 8–11 contained bulk brain control cells, and non-neuronal cells which were excluded from the analysis. DOI: http://dx.doi.org/10.7554/eLife.20488.020 [file elife-20488-fig4-data1.xlsx]

## Sheet: gene_names
Figure 4 Source Data 1		In Vitro Brain Development Single Cell RNA-seq from Yao et al. 2016
Cell Name	26Dp1_A01	26Dp1_A02	26Dp1_A03	26Dp1_A04	26Dp1_A05	26Dp1_A06	26Dp1_A07	26Dp1_A08	26Dp1_A09	26Dp1_A10	26Dp1_A11	26Dp1_A12	26Dp1_B01	26Dp1_B02	26Dp1_B03	26Dp1_B04	26Dp1_B05	26Dp1_B06	26Dp1_B08	26Dp1_B09	26Dp1_B10	26Dp1_B11	26Dp1_B12	26Dp1_C01	26Dp1_C02	26Dp1_C03	26Dp1_C04	26Dp1_C05	26Dp1_C06	26Dp1_C07	26Dp1_C08	26Dp1_C09	26Dp1_C10	26Dp1_C11	26Dp1_C12	26Dp1_D01	26Dp1_D02	26Dp1_D03	26Dp1_D04	26Dp1_D05	26Dp1_D06	26Dp1_D07	26Dp1_D08	26Dp1_D09	26Dp1_D10	26Dp1_D11	26Dp1_D12	26Dp1_E01	26Dp1_E02
Cluster	4	4	4	4	4	6	4	6	4	4	4	10	4	4	4	4	4	4	4	4	4	4	11	4	4	4	3	4	4	4	4	4	4	2	11	4	4	4	4	4	4	4	4	2	4	4	11	4	4
[truncated: 2,168 more columns]
