# Supplementary material for: Discovering sparse transcription factor codes for cell states and state transitions during development
Source: eLife. 2017 Mar 15;6:e20488. doi: 10.7554/eLife.20488 (PMC5352226; doi:10.7554/eLife.20488)
Supplement: Figure 4—source data 3. — Listed are, for crucial triplets along the lineage tree, the genes with the p>0.8 of belonging to the two transition gene classes and the root marker class, and their associated probabilities. DOI: http://dx.doi.org/10.7554/eLife.20488.022 [file elife-20488-fig4-data3.xlsx]

## Sheet: C0-C1-C2
Transition Genes					Marker Genes
C0-C2	Probability	C0-C1	Probability		C0	C2	C1
ARID5B	1	AFF4	1		ATF4	ARID2	ARGFX
DMRTA1	1	AHRR	1		MBD4	ARID4A	BAZ2B
FOXG1	1	ARID1A	1		POU2F1	ARID4B	CRX
GLI3	1	ARID1B	1		ZNF561	ATF6B	DUXA
HES1	1	ARID3A	1		CDC5L	CSDE1	EBF2
HES5	1	ARX	1		ZNF93	EMX2	EBF3
HMGA2	1	ATF3	1		ZFX	FOXK1	ELF2
MYCL1	1	BACH2	1		TFDP1	HMG20B	ETV1
PRDM16	1	BAZ2A	1		E2F7	HSF1	FEZF1
REST	1	CEBPG	1		CBFB	KDM5B	HES2
RREB1	1	CREB5	1		KLF3	NCOR1	IRF1
SOX2	1	DMRTA2	1		ZNF770	SIX3	JUND
SOX9	1	ETS2	0.999999		ZNF281	SMARCE1	KLF6
SRY	1	FOXN3	0.999999		ZNF486	SOX5	KLF7
TGIF1	1	GATAD2B	0.99998		XBP1	SREBF2	LASS4
TP53	1	JDP2	0.999977		ZNF22	STAT3	LCOR
VAX1	1	LCORL	0.999964		RNF138	TFDP2	LHX1
HMGB2	1	LIN28A	0.99995		ZNF24	THAP5	LMX1B
TCF7L2	1	LIN28B	0.999913		NFE2L2	TUB	MEIS3
OTX2	1	LITAF	0.999861		ZNF92	ZEB1	NHLH1
GLIS3	1	MAFG	0.999616		ZNF85	ZIC2	PBX3
NR3C1	1	MAX	0.999481		ZNF43	ZIC4	POU5F1
HMGB1	1	NR2F1	0.999034		MYSM1	ZKSCAN1	RERE
SP8	1	NR2F2	0.998485		BACH1	ZNF226	RHD
ID1	1	NR4A1	0.998284		NR2C1	ZNF254	SATB1
ETV4	1	NR6A1	0.998019		ZNF644	ZNF292	SHOX
IKZF2	1	ONECUT2	0.996479		HIF1A	ZNF471	SIX4
ZBED1	1	PBRM1	0.996479		ARID3B	ZNF521	SOX11
SOX6	1	PBX2	0.993057		CREB3	ZNF532	TADA2B
HES4	1	POU3F1	0.992227		DNAJC2	ZNF80	TSC22D1
SIX5	1	POU3F2	0.991436		ZNF138	ZNF91	TSC22D3
HMGXB4	1	PROX1	0.988815		SMARCC1		VENTX
ZNF354C	1	RORB	0.987135		PMS1		ZBTB3
ID4	1	SOX15	0.986476		HMGB3		ZBTB8A
TCF7L1	1	SOX4	0.985932		ZNF681		ZFP42
YBX1	1	SUB1	0.96018		CAMTA1		ZNF264
PLAGL1	1	TEAD1	0.944516		ADNP		ZNF33B
ZNF90	1	TOX3	0.93495		TFAM		ZNF490
ZBTB38	1	ZHX3	0.932368		TCF3		ZNF492
BNC2	1	ZNF195	0.928222		SMAD2		ZNF493
MTA3	0.999999	ZNF238	0.922868		WHSC1		ZNF526
SOX21	0.999999	ZNF28	0.921517		SALL4		ZNF528
FEZF2	0.999999	ZNF286A	0.917149		SMAD5		ZNF554
ZNF878	0.999999	ZNF33A	0.909224		SSRP1		ZNF662
TGIF2	0.999999	ZNF587	0.884417		GTF2I		ZNF677
FOXM1	0.999997	ZNF652	0.871528		ZNF410		ZNF713
ZNF98	0.999984	ZNF664	0.847435		MGA		ZNF716
SOX1	0.99998	ZNF845	0.808009		DMTF1		ZNF785
ZNF485	0.999972				TSC22D2		ZNF791
ETV5	0.999968				ZNF430		ZNF793
PRDM5	0.99996				ZNF146		ZNF814
FOXO1	0.999932				TERF1		ZNF83
ZNF107	0.999926				AFF1		ZNF865
ZNF16	0.999923				YY1		ZSCAN2
NPAS3	0.999918				SP3		ZSCAN22
PLAG1	0.999917						ZSCAN29
ZNF536	0.99912
GLI2	0.998649
TEAD2	0.998291
MECOM	0.997304
NFATC4	0.996491
DNAJC1	0.996087
ZNF507	0.994575
SOX3	0.994508
ERF	0.994477
ZNF672	0.994264
CSDA	0.993553
SALL2	0.991768
ATF1	0.987251
ZNF740	0.984982
ZNF442	0.983896
NFYB	0.982841
PAX6	0.981494
PIAS2	0.980929
HMGA1	0.975959
ZNF443	0.975559
CUX1	0.958564
ZNF732	0.935426
HMG20A	0.926499
ZNF678	0.91309
BBX	0.895982
ZNF433	0.889572
TEAD3	0.877844
MAF	0.867615
ZNF771	0.825673
GABPA	0.825412
E2F5	0.803726

## Sheet: C0-C2-C4
Transition Genes					Marker Genes
C2-C0	Probability	C2-C4	Probability		C2	C0	C4
CSDA	1	ARGFX	1		PRDM16	ADNP	AFF4
FOXM1	1	ARID5B	1		FOXG1	AFF1	ARID4A
FOXO1	1	ASCL1	1		IRF1	ARID1B	JUND
GLI3	1	ATF6B	1		SIX3	ARID2	LASS5
HES1	1	BCL11A	1		BBX	ARID3B	LCOR
HMGA2	1	CRX	1		SOX5	ATF4	LHX2
HMGB2	1	CSDC2	1		TFDP2	BACH1	LHX9
ID1	1	CUX1	1		HBP1	CBFB	MAZ
ID3	1	EBF1	1			CDC5L	MXI1
REST	1	EMX2	1			CEBPG	PBX1
SMAD3	1	FEZF1	1			CREB1	RERE
SOX2	1	FOXP2	1			CREB3	TULP4
SOX21	1	HES6	1			CSDE1	ZBTB16
SRY	1	JUN	1			DMTF1	ZFHX4
TCF7L1	1	KDM5B	1			DNAJC1	ZFP90
TCF7L2	1	KLF12	1			DNAJC2	ZHX1
TGIF1	1	KLF13	1			E2F7	ZMIZ1
TGIF2	1	KLF7	1			EGR1	ZNF197
TP53	1	KLF8	1			FOXK1	ZNF493
ZNF732	1	MAFB	1			FOXP1	ZNF506
ZNF90	1	MECOM	1			GTF3A	ZNF669
RREB1	1	MEF2D	1			HIF1A	ZNF713
HMGB1	1	MEIS1	1			HMGB3	ZNF737
ID4	1	MNT	1			HSF1	ZNF83
HMGA1	1	MTA1	1			KDM5A	ZSCAN18
ETV5	1	MXD4	1			KLF3
SALL4	1	NFIA	0.999997			LCORL
PLAGL1	1	NFIB	0.999986			LIN28A
HES5	1	ONECUT2	0.999974			LIN28B
ZNF878	1	POU2F2	0.999952			LITAF
NR6A1	1	PRDM2	0.999947			MAX
BNC2	1	RORB	0.999904			MBD4
HMGXB4	1	SATB1	0.999888			MGA
MTA3	1	SMARCC2	0.999856			MYSM1
SP1	1	SOX11	0.999848			NCOR1
SALL1	1	SOX4	0.999839			NFAT5
NR3C1	1	SREBF1	0.999787			NFE2L2
PRDM5	1	SREBF2	0.999753			NFX1
IRX2	1	THRA	0.999735			NR2C1
CREB3L2	1	TOX	0.99957			PBRM1
OTX1	0.999999	TRPS1	0.999544			PMS1
SP8	0.999998	TUB	0.999536			POU2F1
ETV4	0.999996	USF1	0.999515			RNF138
GLI2	0.999993	ZBTB20	0.999162			SMAD2
SOX9	0.999977	ZBTB45	0.998802			SMAD5
CAMTA1	0.99996	ZFHX3	0.998567			SMARCC1
TEAD3	0.999939	ZIC1	0.998354			SMARCE1
E2F3	0.999773	ZIC2	0.997806			SP100
RFX4	0.999641	ZIC3	0.997417			SP3
E2F2	0.999615	ZIC4	0.994996			SSRP1
NFYC	0.998617	ZIC5	0.994748			SUB1
SIX4	0.996885	ZKSCAN1	0.986463			TCF12
NFATC3	0.996246	ZNF25	0.981892			TCF3
PAX6	0.985699	ZNF441	0.981246			TEAD1
ZNF354C	0.985671	ZNF467	0.970303			TERF1
MXD3	0.984992	ZNF490	0.970139			TFAM
PLAG1	0.979639	ZNF528	0.965574			TFDP1
ELK3	0.9764	ZNF532	0.961848			TOX3
TEAD2	0.974377	ZNF536	0.956163			TOX4
STAT1	0.934463	ZNF580	0.953091			TSC22D2
SALL2	0.907243	ZNF709	0.930152			WHSC1
CREM	0.905682	ZNF775	0.930018			XBP1
E2F8	0.874836	ZNF776	0.924538			YY1
ZNF485	0.86918	ZNF80	0.916387			ZFX
PBX2	0.855063	ZNF821	0.904804			ZNF138
		ZNF827	0.891053			ZNF146
		ZNF865	0.874345			ZNF148
						ZNF195
						ZNF24
						ZNF281
						ZNF286A
						ZNF3
						ZNF410
						ZNF426
						ZNF43
						ZNF430
						ZNF445
						ZNF486
						ZNF561
						ZNF562
						ZNF587
						ZNF626
						ZNF644
						ZNF652
						ZNF655
						ZNF664
						ZNF681
						ZNF714
						ZNF814
						ZNF85
						ZNF91
						ZNF92
						ZNF93
						ZNF98
						ZXDC
						ZZZ3

## Sheet: C0-C1-C3
Transition Genes					Marker Genes
C0-C1	Probability	C0-C3	Probability		C0	C1	C3
AFF1	1	AHRR	1		ADNP	ARGFX	ATF6B
ARID1A	1	ARID5B	1		CAMTA1	BAZ2B	CREB5
ARID2	1	ATF4	1		CBFB	CARHSP1	FOXK1
ARID3A	1	BBX	1		CDC5L	CRX	HMG20B
ARID3B	1	BHLHE40	1		CEBPG	DUXA	ID2
ARID4B	1	CSDA	1		CREB1	ELF2	JUN
ARX	1	CUX1	1		CREM	ETV1	KLF6
CAMTA2	1	DNAJC1	1		DMTF1	HES2	MAZ
CSDE1	1	E2F1	1		DNAJC2	IRF1	MEIS1
DMRTA2	1	E2F5	1		E2F7	JUND	MXI1
ETS2	1	E2F8	1		EGR1	KLF7	NFIB
FEZF1	1	EAF2	1		ETV5	LASS4	POU3F2
HIC2	1	ERF	1		GTF2I	LCOR	RELA
HMGA1	1	ETV4	1		GTF3A	LMX1B	RFX3
KDM5B	1	FOXM1	1		HIF1A	MAX	SREBF2
LHX2	1	FOXO1	1		HMGB2	MEIS3	STAT2
LHX5	1	GLI2	1		HMGB3	NHLH1	STAT3
LIN28A	0.999997	GLI3	1		JARID2	ONECUT2	TCF12
LIN28B	0.999963	GLIS3	1		LCORL	PBX1	TCF4
LITAF	0.999901	HES1	1		MBD4	PBX3	TFDP2
NANOG	0.999871	HES4	1		MGA	POU5F1	THAP5
NR6A1	0.999867	HES5	1		MYSM1	RERE	TOX
OTX2	0.999848	HMGA2	1		NFAT5	RHD	ZEB1
PBRM1	0.999845	HMGB1	1		NFYB	SATB1	ZEB2
PBX2	0.999819	HMGXB4	1		NFYC	SHOX	ZKSCAN1
POU3F1	0.999608	ID1	1		NR2F2	SUB1	ZMIZ1
SALL4	0.999523	ID3	1		PMS1	TADA2B	ZNF322A
SIX3	0.999445	ID4	1		POU2F1	TSC22D1
SIX4	0.999421	IKZF2	1		SALL2	TSC22D3
SMARCE1	0.998461	KLF13	1		SMAD2	TULP4
SOX11	0.998213	LEF1	1		SP100	VENTX
SOX15	0.997062	MAF	1		SP3	ZBTB3
SOX4	0.99572	MNT	1		SP4	ZBTB8A
TOX3	0.995093	MTA3	1		TCF3	ZFP42
ZFHX4	0.99068	MYCL1	1		TEAD1	ZNF264
ZNF195	0.98947	NFATC4	1		TERF1	ZNF33B
ZNF286A	0.984523	NFE2L2	1		TFAM	ZNF483
ZNF33A	0.98215	NFKB2	1		TFDP1	ZNF490
ZNF587	0.982036	NPAS3	0.999999		WHSC1	ZNF492
ZNF600	0.980049	NR2F1	0.999999		XBP1	ZNF493
ZNF652	0.947215	NR3C1	0.999997		YY1	ZNF526
ZNF664	0.936358	PAX6	0.999994		ZFX	ZNF554
ZNF697	0.925616	PIAS2	0.999988		ZNF100	ZNF627
ZNF91	0.92148	PINX1	0.999985		ZNF146	ZNF662
		PLAG1	0.999984		ZNF148	ZNF677
		PLAGL1	0.999981		ZNF22	ZNF713
		PRDM16	0.99998		ZNF24	ZNF716
		PRDM5	0.999978		ZNF253	ZNF737
		REST	0.999963		ZNF281	ZNF765
		RFX4	0.999953		ZNF43	ZNF785
		RREB1	0.999934		ZNF430	ZNF793
		SALL1	0.999863		ZNF486	ZNF83
		SALL3	0.999768		ZNF521	ZNF865
		SIX5	0.99976		ZNF561	ZSCAN2
		SMAD5	0.999632		ZNF644	ZSCAN22
		SOX1	0.999575		ZNF714	ZSCAN29
		SOX13	0.999543		ZNF770
		SOX2	0.999434		ZNF85
		SOX21	0.99912		ZNF92
		SOX3	0.998916		ZNF93
		SOX6	0.998511		ZNF98
		SOX9	0.998259
		SSRP1	0.998249
		STAT1	0.998188
		TCF7L1	0.998155
		TCF7L2	0.996491
		TEAD2	0.996283
		TGIF1	0.995516
		TGIF2	0.995446
		THRA	0.995404
		TP53	0.994508
		YBX1	0.993521
		ZBED1	0.992433
		ZBTB1	0.991676
		ZBTB38	0.989936
		ZNF107	0.985351
		ZNF16	0.985036
		ZNF181	0.982668
		ZNF235	0.976083
		ZNF239	0.963051
		ZNF354C	0.958564
		ZNF396	0.950707
		ZNF433	0.94898
		ZNF485	0.941455
		ZNF507	0.924009
		ZNF536	0.923891
		ZNF672	0.903123
		ZNF678	0.899242
		ZNF732	0.895962
		ZNF740	0.886964
		ZNF771	0.867615
		ZNF879	0.825265
		ZNF90	0.802848

## Sheet: C0-C2-C3
Transition Genes					Marker Genes
C0-C2	Probability	C0-C3	Probability		C0	C2	C4
ARID3B	1	AHR	1		SOX4	ARGFX	ARID5B
DMRTA1	1	AHRR	1		ZNF486	ARID4A	HMG20B
FEZF1	1	ATF3	1		ZNF732	BBX	ID2
FEZF2	1	ATF4	1		PAX6	CRX	JUN
FOXG1	1	ATF6	1		ZNF664	EMX2	JUND
HMGA1	1	CEBPG	1		ZNF281	HES1	KLF6
HMGA2	1	CREB3	1		MBD4	IRF1	MEIS1
HMGB2	1	CREB5	1		ZNF652	POU5F1	MXI1
LHX2	1	EGR1	1		ZNF587	PRDM16	NFIA
LIN28A	1	FOXN3	1		TP53	TCF7L2	PREB
LIN28B	1	FOXO1	1		ZNF85	TUB	RFX3
MECOM	1	GLIS3	1		ZNF93	ZBTB3	RFX4
NR6A1	1	GTF2I	1		ZNF286A	ZIC1	SOX9
OTX2	1	HIF1A	1		TERF1	ZIC2	SREBF2
SIX3	1	ID1	1		ZNF714	ZIC3	TOX
SP8	1	ID3	1		MYSM1	ZNF292	ZEB2
ZFHX4	1	ID4	1		ADNP	ZNF490	ZMIZ1
SRY	1	JDP2	1		ZNF430	ZNF492
SALL4	1	KLF13	1		ZNF195	ZNF532
HIC2	1	LEF1	1		DNAJC2	ZNF793
KDM5B	1	LITAF	1		CBFB	ZNF80
CSDE1	1	MAFG	0.999999		ZNF146	ZNF865
SOX11	1	MAX	0.999999		TCF3
ARID3A	1	MEF2D	0.999998		TFDP1
SMARCE1	1	MNT	0.999998		ZNF561
BNC2	1	NFE2L2	0.999922		SP3
ARID2	0.999999	NR2F1	0.999629		PMS1
OTX1	0.999997	NR2F2	0.999559		NFAT5
GLI3	0.999975	NR4A1	0.999408		ZNF644
HMGB3	0.999355	PINX1	0.999401		POU2F1
SIX4	0.999159	POU3F2	0.99899		SMAD2
ETV5	0.999062	PROX1	0.998347		CAMTA1
ZNF521	0.997832	SALL1	0.99788		TFAM
LHX5	0.994224	SALL3	0.997265		ZZZ3
ZNF878	0.986382	SOX13	0.996432		ZNF33A
ZNF98	0.980806	SOX21	0.993727		MGA
JARID2	0.969402	SREBF1	0.993696		DMTF1
VAX1	0.95629	SUB1	0.993332		ZNF770
TFDP2	0.913796	TCF12	0.992609		WHSC1
		TEAD1	0.989022		ZNF91
		THAP10	0.98872		YBX1
		THRA	0.978137		BAZ2A
		TOX3	0.966348		ZNF431
		TRPS1	0.958694		SSRP1
		TSC22D2	0.953601		CREM
		XBP1	0.951181		DNAJC1
		YBX2	0.926109		E2F7
		ZBTB20	0.911221		ZNF92
		ZFX	0.882379		TGIF2
		ZHX2	0.8627		ZNF90
		ZNF235	0.860314		ZNF562
		ZNF238	0.856057		ZNF148
		ZNF28	0.841272		BACH1
		ZNF536	0.801977		CREB1
		ZNF681	0.80027		ARID1A
					ARID1B
					MTA3
					HSF1
					SALL2
					PBRM1
					YY1
					REST
					SMARCC2
					ZNF471
					CDC5L
					KDM5A
					ZNF445
					AFF1
					NFYC
					ZNF43
					HMGXB4
					GTF3A
					CSDA
					ARID4B
					ZNF655
					ZNF138
					ZNF626
					TULP4
					NFX1
					LCORL
					KLF3
					VEZF1

## Sheet: C0-C3-C5
Transition Genes					Marker Genes
C3-C5	Probability	C3-C0	Probability		C3	C5	C0
AFF3	1	ATF1	1		RFX4	AFF4	ADNP
ASCL1	1	ATF3	1		JUND	ARGFX	AFF1
BCL11A	1	ATF4	1		RELA	ARID1B	ARID1A
FOXP2	1	ATF6	1		ZEB1	ARID4A	ARID2
IRX1	1	BBX	1		SOX9	BAZ2B	ARID3B
NFIA	1	CAMTA1	1		RFX3	CRX	ARID4B
NFIB	1	CARHSP1	1		TFDP2	DUXA	BACH1
NFIX	1	CDC5L	1		STAT3	HES2	BAZ2A
PAX3	1	CREB3	1		ZNF226	IRF1	CEBPG
POU3F4	1	CREB3L4	1		KLF6	LCOR	CREB1
THRA	1	CREM	1		ID2	LMX1B	CSDE1
TRPS1	1	CSDA	1		ATF6B	PBX1	DMTF1
ZBTB20	1	DNAJC1	1		JUN	PBX3	EGR1
ZIC1	1	DNAJC2	1		MXI1	PIAS1	HMGB1
ZNF536	1	E2F1	1			POU5F1	HMGB3
ZIC4	1	E2F3	1			RERE	HMGXB4
HOXB2	1	E2F5	1			RHD	JARID2
CAMTA2	1	E2F6	1			SHOX	KDM5B
NFIC	1	E2F7	1			SOX11	LCORL
EN2	1	EAF2	1			SP100	LIN28A
HES6	1	ELF1	1			SUB1	MAX
TSHZ1	1	ERF	1			TADA2B	MBD4
TOX	1	ETV4	1			TSC22D1	MGA
ARID5B	1	ETV5	1			TULP4	MYSM1
POU3F2	1	FOS	1			VENTX	NCOR1
NPAS3	1	FOXG1	1			ZBTB3	NFAT5
ZNF25	1	FOXM1	1			ZBTB8A	NFYB
ZNF528	1	FOXP1	1			ZFHX3	NR2C1
ZNF827	1	GLI3	1			ZFP14	OTX2
KLF13	1	GLIS3	1			ZFP42	PBRM1
CSDC2	1	GTF2I	1			ZHX3	PMS1
ZHX2	1	GTF3A	1			ZNF117	POU2F1
EBF1	0.999999	HBP1	1			ZNF250	SMAD2
GCM1	0.999999	HES1	1			ZNF254	SMARCC1
IRX2	0.999997	HES4	1			ZNF264	SMARCE1
BCL11B	0.999996	HES5	1			ZNF292	SP3
ZNF821	0.999965	HIC2	1			ZNF33A	TERF1
SMAD9	0.999963	HIF1A	1			ZNF347	TFAM
TOX2	0.99995	HINFP	1			ZNF430	TOX3
MEIS1	0.999888	HMG20B	1			ZNF445	WHSC1
KLF12	0.999886	HMGA1	1			ZNF483	YY1
MNT	0.999841	HMGA2	1			ZNF490	ZFX
PPARD	0.999797	HMGB2	1			ZNF492	ZNF148
FOXK1	0.999754	HSF1	1			ZNF493	ZNF281
MXD4	0.999706	ID1	1			ZNF506	ZNF286A
KLF7	0.999558	ID3	1			ZNF526	ZNF43
ZEB2	0.998873	ID4	1			ZNF527	ZNF431
ZMIZ1	0.997527	IRF3	1			ZNF532	ZNF486
ZKSCAN1	0.996824	IRF7	1			ZNF554	ZNF561
ZNF235	0.994467	JDP2	1			ZNF555	ZNF644
ZNF517	0.993772	KLF3	1			ZNF557	ZNF652
POU6F1	0.990475	LASS4	1			ZNF562	ZNF664
ZNF709	0.985112	LEF1	1			ZNF619	ZNF714
ZNF285	0.978758	LIN28B	1			ZNF662	ZNF732
ZNF696	0.977991	LITAF	1			ZNF665	ZNF770
PPARA	0.977559	MAZ	1			ZNF674	ZNF85
SOX4	0.96278	MTA3	1			ZNF677	ZNF92
ZNF441	0.916766	MXD3	1			ZNF681	ZNF93
ZNF276	0.872449	MYST2	1			ZNF708	ZNF98
MLXIP	0.87211	NFATC4	0.999999			ZNF716
ZNF471	0.825	NFE2L2	0.999999			ZNF737
SMARCC2	0.81989	NFKB2	0.999999			ZNF785
USF1	0.817491	NFYC	0.999999			ZNF793
		NR1H2	0.999998			ZNF814
		NR1H3	0.999998			ZNF865
		NR2F1	0.999998			ZNF91
		NR2F2	0.999997			ZSCAN12
		NR4A1	0.999996			ZSCAN22
		NRF1	0.999996			ZSCAN29
		PAX6	0.999993
		PBX2	0.999986
		PIAS3	0.999985
		PINX1	0.999976
		PLAG1	0.999973
		PLAGL1	0.99997
		PLAGL2	0.999964
		PRDM16	0.999949
		PRDM5	0.999934
		REPIN1	0.999926
		REST	0.999924
		RFX5	0.999881
		RNF138	0.999381
		RREB1	0.999116
		SALL2	0.999004
		SALL4	0.998907
		SIX5	0.998797
		SMAD3	0.998498
		SMAD5	0.998308
		SOX13	0.998183
		SOX2	0.99816
		SOX21	0.998006
		SOX3	0.996706
		SOX6	0.996404
		SP8	0.995843
		SSRP1	0.995663
		STAT1	0.993784
		STAT6	0.991832
		TCF12	0.983618
		TCF3	0.982876
		TCF7L1	0.981507
		TCF7L2	0.980612
		TEAD2	0.974152
		TEAD3	0.970992
		TFDP1	0.970637
		TGIF1	0.969773
		TGIF2	0.967905
		THAP9	0.966544
		TP53	0.966257
		TULP3	0.963045
		XBP1	0.959533
		YBX1	0.952748
		ZFHX4	0.950188
		ZNF219	0.948803
		ZNF22	0.938799
		ZNF24	0.934598
		ZNF257	0.932408
		ZNF322A	0.924664
		ZNF396	0.91816
		ZNF408	0.917349
		ZNF410	0.904857
		ZNF444	0.89025
		ZNF521	0.889585
		ZNF581	0.880965
		ZNF90	0.878368
		ZSCAN18	0.85024
		ZZZ3	0.835673

## Sheet: C5-C6-C7
Transition Genes					Marker Genes
C5-C6	Probability	C5-C7	Probability		C5	C6	C7
ARID3B	1	AHR	1		NANOG	BCL11A
CSDE1	1	AIRE	1		ZNF619	C16orf5
GTF2I	1	ARGFX	1		ZBTB3	GTF3A
KDM5B	1	DUXA	1		LMX1B	HSF1
ZKSCAN1	1	E2F2	1		PPARD	MAZ
ZKSCAN2	1	E2F8	1		ZNF264	MXI1
ZNF354C	1	HES1	1		ZNF674	POU3F2
ZNF460	1	HES2	1		ZNF814	ZBTB41
ZNF498	1	IRF1	1		ZHX3	ZFHX4
ZNF71	1	NFIB	1		ZNF347	ZNF25
ZNF764	1	POU5F1	1		ZXDC	ZNF281
ZNF778	1	PPARA	1		ZNF526	ZNF580
TSC22D1	1	SIX4	1		TCF4	ZSCAN18
ZNF286A	1	SOX2	1		ZNF528
TULP4	1	SOX7	1		NFX1
ZBTB25	1	SOX9	1		TFDP2
ZNF610	1	SP100	1		ZNF483
ZNF646	1	SP140L	0.999999		ZNF681
ZNF583	1	TGIF1	0.999999		ZSCAN22
PIAS2	1	ZFP42	0.999975		ZNF490
GLI4	1	ZIM3	0.999946		VENTX
ZNF18	1	ZNF208	0.997846		ZBTB8A
SMARCE1	1	ZNF471	0.995308		ZNF430
ZNF689	1	ZNF492	0.990563		ZSCAN29
ZNF574	1	ZNF556	0.990104		ZNF445
ZNF708	1	ZNF662	0.987752		ZNF785
POU3F4	1	ZNF716	0.952742		ZNF117
ZSCAN12	1	ZNF865	0.935686		ZNF805
ZNF620	1
CRX	1
ARID4B	1
BAZ2B	1
ZNF16	1
ZNF8	1
ZNF496	1
ZNF836	1
ZNF74	1
ZNF236	1
ZSCAN2	1
ZFP112	1
YBX1	1
ZNF135	1
ZNF221	1
TOX4	1
RERE	1
ZNF737	1
RFX3	1
TOX2	1
ZNF33A	1
ZNF512	1
SMARCC2	1
NFATC3	1
AFF4	1
USF1	1
ATF6B	1
ZNF606	1
ZNF253	1
WHSC1	1
ZNF91	1
ZNF548	1
ZNF167	1
ZNF655	1
ZHX1	1
ZBTB24	1
ZNF254	1
HMBOX1	1
ZNF506	1
ZBTB46	1
ZNF549	1
ZNF529	1
ZNF552	1
MYT1L	1
ZNF335	1
ZNF699	1
ZNF266	1
POU2F2	1
ZFP41	1
ZBTB48	1
ZNF24	1
NCOR1	1
ZNF229	1
ZNF808	1
ZNF678	1
EBF2	1
NR1H2	1
ZNF615	1
KDM5C	1
SOX11	1
ZNF846	1
TADA2A	1
THAP7	1
ZNF484	1
ZNF324	1
ZNF333	1
ZKSCAN4	1
PIAS1	1
ZNF696	1
FOXJ3	1
ZNF789	1
ZNF416	1
ZMIZ1	1
FOXP4	1
ZNF510	1
ZBTB20	1
STAT2	1
HMGXB3	1
SETDB1	1
KLF7	1
MYCL1	1
ZNF419	1
PATZ1	1
ZBTB40	1
ZNF493	1
LCOR	1
ZNF41	1
TUB	1
MBD3	0.999999
ZFP64	0.999999
SOX4	0.999999
ZNF292	0.999999
ZNF33B	0.999999
HIF1A	0.999999
ZNF536	0.999999
BBX	0.999999
ZNF607	0.999999
RFX5	0.999999
ZNF250	0.999998
ZNF582	0.999998
ZNF827	0.999998
NFAT5	0.999998
ZNF331	0.999998
ZNF431	0.999998
ZNF643	0.999998
ZNF76	0.999997
ZNF195	0.999997
ZNF177	0.999997
TCF12	0.999997
ARID4A	0.999997
JARID2	0.999996
ASCL1	0.999996
ZNF497	0.999996
GATAD2B	0.999996
THAP10	0.999995
ZNF146	0.999995
ZNF652	0.999995
ZNF589	0.999995
ZNF713	0.999994
ZNF232	0.999993
ZNF551	0.999992
SREBF2	0.999992
ZNF544	0.999991
TFE3	0.999991
ZNF317	0.999991
SMAD9	0.99999
ZSCAN30	0.999989
TERF1	0.999988
KDM5A	0.999987
ZNF514	0.999987
ZNF160	0.999987
ZFP82	0.999986
ELF2	0.999985
ZNF773	0.999985
ZNF148	0.999984
UBTF	0.999983
HMG20A	0.999983
ZNF75A	0.999982
ZNF629	0.999981
ZNF45	0.999978
ZNF3	0.999977
ZBTB37	0.999976
ZNF709	0.999976
ZNF540	0.999976
INSM1	0.999974
L3MBTL1	0.99997
ZNF880	0.999969
ZNF212	0.999967
ZNF174	0.999965
RXRB	0.999964
ARID2	0.999963
ZNF627	0.999961
ZNF234	0.99996
CSDC2	0.999959
ZNF285	0.999959
ZNF519	0.999957
ZNF143	0.999956
CREB1	0.999954
ZNF426	0.999951
ZNF672	0.999951
LASS5	0.99995
ZFP30	0.999946
ZNF84	0.999946
ZNF70	0.999936
HIVEP3	0.999936
ZNF577	0.999925
ZNF225	0.999924
ZNF382	0.999923
ZNF841	0.999917
ZNF559	0.999913
ZNF586	0.999907
LCORL	0.999907
ZNF770	0.999897
ZNF34	0.999896
MLXIP	0.99989
ATF7	0.999883
ZNF251	0.999868
ZNF302	0.999867
MYSM1	0.999859
ZSCAN16	0.999857
ZNF184	0.999822
ZBTB43	0.999816
ZNF532	0.999811
ZBTB17	0.999808
ZNF566	0.999804
NR2C1	0.999796
ATF2	0.999781
DMTF1	0.99977
SUB1	0.999762
ZBTB4	0.999752
SMARCC1	0.999722
ZNF512B	0.999718
ZNF714	0.999709
NRF1	0.999681
ZNF594	0.999653
ZNF320	0.999551
ETV6	0.999548
ZNF439	0.999527
ZNF337	0.999515
MYT1	0.9995
ZNF486	0.999498
ZNF193	0.999461
KIAA2018	0.999428
LHX5	0.999426
ZNF587	0.999423
ZNF226	0.999406
ZNF776	0.999368
ZNF500	0.999362
ZNF781	0.999349
KLF12	0.999322
VEZF1	0.999314
ZNF154	0.9993
ZNF468	0.999271
MTA1	0.999257
ZNF136	0.999206
ZNF624	0.999197
ZNF362	0.999114
ZNF124	0.999112
ARNTL	0.999101
ZNF557	0.999052
NFYA	0.99904
MEIS1	0.999016
ZNF140	0.99901
ST18	0.998924
HMGB3	0.998886
ZNF644	0.998865
GMEB1	0.998832
ZNF79	0.998793
TFDP1	0.998761
ZNF675	0.998757
ZNF641	0.998683
ZNF180	0.998658
FOXJ2	0.998584
ZNF790	0.998562
NR2C2	0.998503
BAZ2A	0.998495
HKR1	0.998488
ZNF791	0.998487
ZNF22	0.998485
MBD1	0.998414
HOMEZ	0.998299
ZNF397	0.998265
ZNF623	0.998195
ZNF454	0.998124
ZNF407	0.99805
PRDM2	0.998044
FOXK2	0.998027
ZNF418	0.997993
ZNF142	0.997969
ZNF263	0.997953
PBX1	0.997653
ZNF181	0.997556
SOX5	0.997527
MEIS3	0.997518
CUX2	0.997192
ZNF711	0.997133
ZKSCAN3	0.997128
POU2F1	0.997073
LASS2	0.996547
MIER3	0.996236
PAX3	0.996182
KLF11	0.996178
ZNF860	0.99608
ZFY	0.995802
HDX	0.995707
ZNF669	0.995413
ZNF584	0.995199
ZNF100	0.994996
ZNF417	0.994883
ZNF211	0.994785
SMAD5	0.994565
NHLH1	0.994473
VDR	0.994399
ZNF7	0.994267
BACH1	0.993895
ZNF275	0.993655
STAT3	0.992905
GZF1	0.992873
ZSCAN23	0.992577
ZNF248	0.99248
ZNF442	0.9919
ZNF451	0.991735
ZNF563	0.991528
ZNF213	0.991433
KLF8	0.991071
ARID1A	0.990939
GATAD1	0.990867
CIC	0.990867
ZNF227	0.989807
RCOR3	0.988348
FOXO3	0.987781
ZNF800	0.987572
STAT1	0.987138
ZNF771	0.986384
EBF1	0.985933
ZNF546	0.985171
LHX1	0.985124
ZNF570	0.984651
DEAF1	0.984506
ZNF420	0.983899
ZNF138	0.983718
ZNF443	0.982796
ZNF93	0.982228
NHLH2	0.980601
FOXK1	0.980209
THAP5	0.979995
TOX	0.97881
ZNF449	0.976621
ZNF470	0.975556
ZNF550	0.975509
ZNF821	0.974912
THAP9	0.974094
ZNF763	0.973674
ZNF274	0.973148
ZNF44	0.967838
PBRM1	0.967264
ZNF197	0.967172
ZNF793	0.966891
PRDM15	0.966617
CARHSP1	0.966078
ZNF343	0.965552
ZNF75D	0.963999
MNT	0.963968
KDM5D	0.963641
SP2	0.963284
HINFP	0.961677
NFE2L1	0.961528
ZNF660	0.961373
ZNF69	0.961219
SP4	0.959996
SIX3	0.95746
ZFP14	0.956036
MGA	0.955106
ZNF43	0.950861
ZNF599	0.94581
ZNF845	0.936115
ZNF432	0.936092
ZNF17	0.935139
PREB	0.932247
ZNF527	0.931851
ZNF554	0.931182
GTF2IRD1	0.926113
ZNF844	0.92148
ZNF700	0.91998
ZNF410	0.917612
ZNF441	0.916353
ZNF879	0.914153
ZFHX3	0.911228
ZNF219	0.905618
MECP2	0.901314
TSC22D3	0.899297
ZIK1	0.899094
ZNF423	0.898392
TEAD2	0.897947
PIAS4	0.897711
ZNF85	0.894954
CEBPG	0.878033
ZNF300	0.876655
ZBTB16	0.874915
MBD4	0.863653
ATF4	0.855166
SHOX	0.854134
ZNF134	0.850468
MEIS2	0.850449
DMBX1	0.849044
SNAPC4	0.846176
ZNF616	0.846121
ZNF32	0.845111
ZNF664	0.836713
PRDM8	0.832343
ARID1B	0.831074
ZNF816	0.812473
